# Supplementary material for: Estimation of stillbirths attributable to ambient fine particles in 137 countries
Source: PubMed Central journal article supplement (PMC9709081; doi:10.1038/s41467-022-34250-4), 2022-11-29
Supplement: 41467_2022_34250_MOESM1_ESM.pdf [file 41467_2022_34250_MOESM1_ESM.pdf]

1 *Estimation of Stillbirths Attributable to Ambient Fine Particles in 137 Countries*

2 Tao Xue<sup>1,\*,#</sup>, PhD, Mingkun Tong<sup>1,#</sup>, et al.

3  
4 **Supplementary Figures**

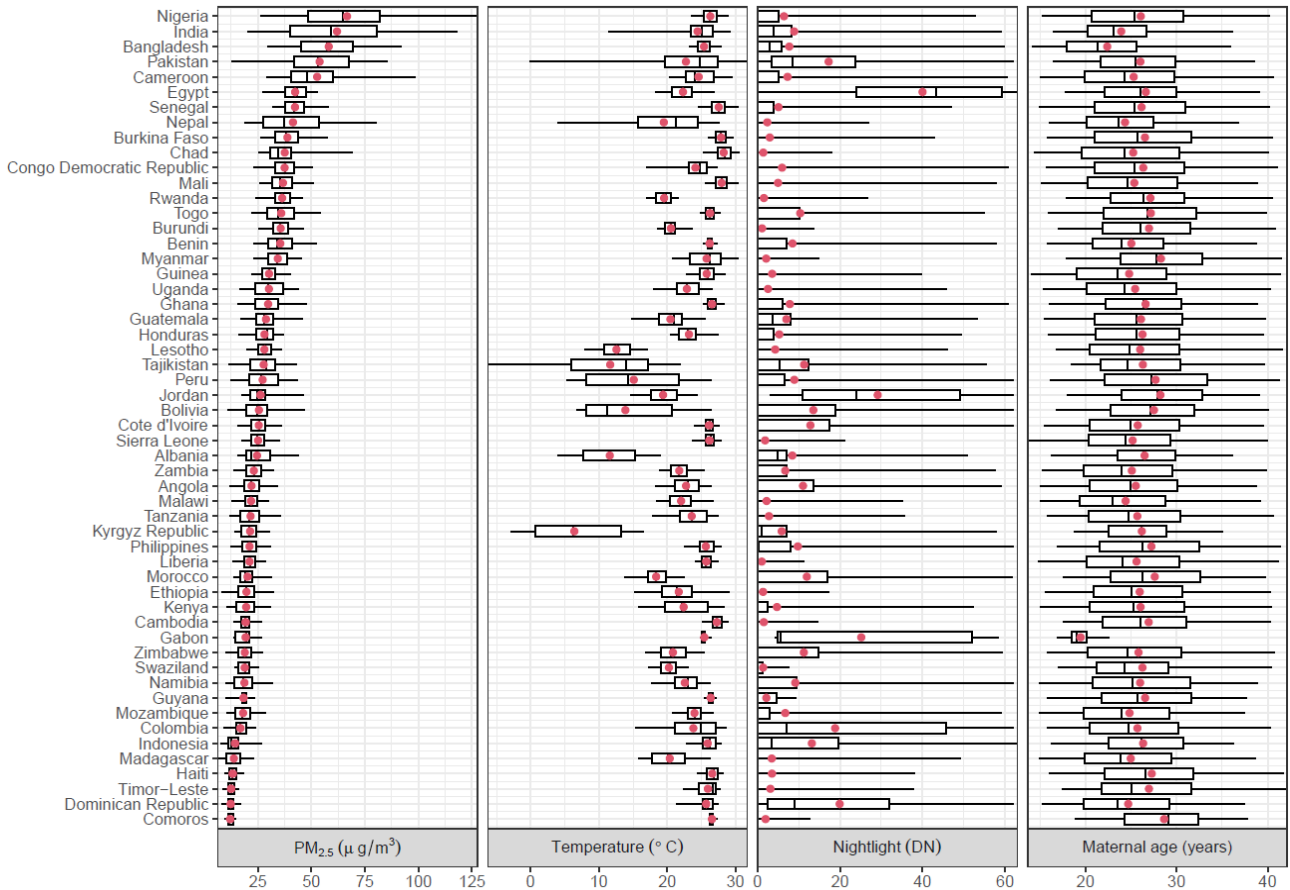

5  
6 Supplementary Fig. 1 Distributions of continuous covariates among the 13,870 stillbirths and their 32,449  
7 controls, by countries. The centre red dots and black bars are means and medians, respectively. The box bounds  
8 and whiskers indicate for ranges from 25<sup>th</sup> to 75<sup>th</sup> and from 2.5<sup>th</sup> to 97.5<sup>th</sup> percentile, respectively.

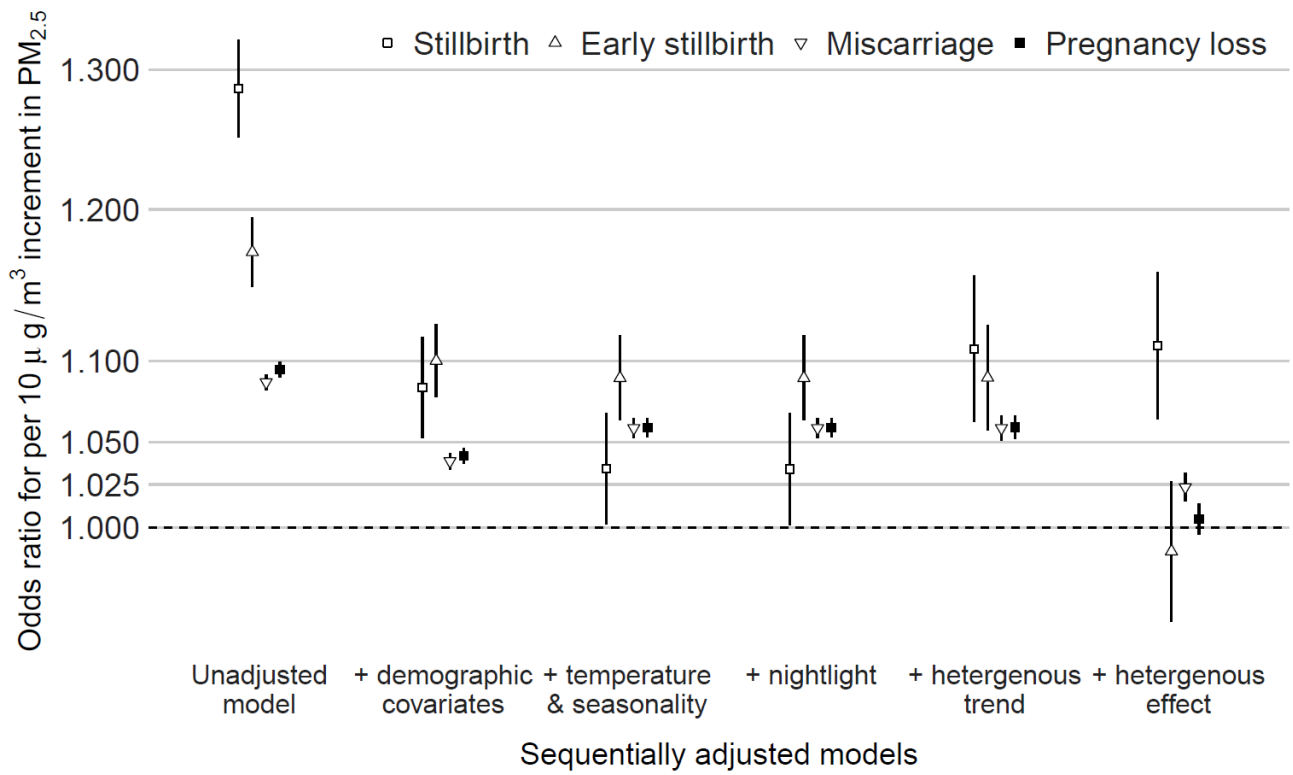

9

10 Supplementary Fig. 2 The linear association between  $\text{PM}_{2.5}$  exposure and stillbirth or secondary outcomes,  
 11 including early stillbirth, miscarriage and pregnancy loss. The dots are point estimates and the error bars are  
 12 corresponding 95% confidence intervals.

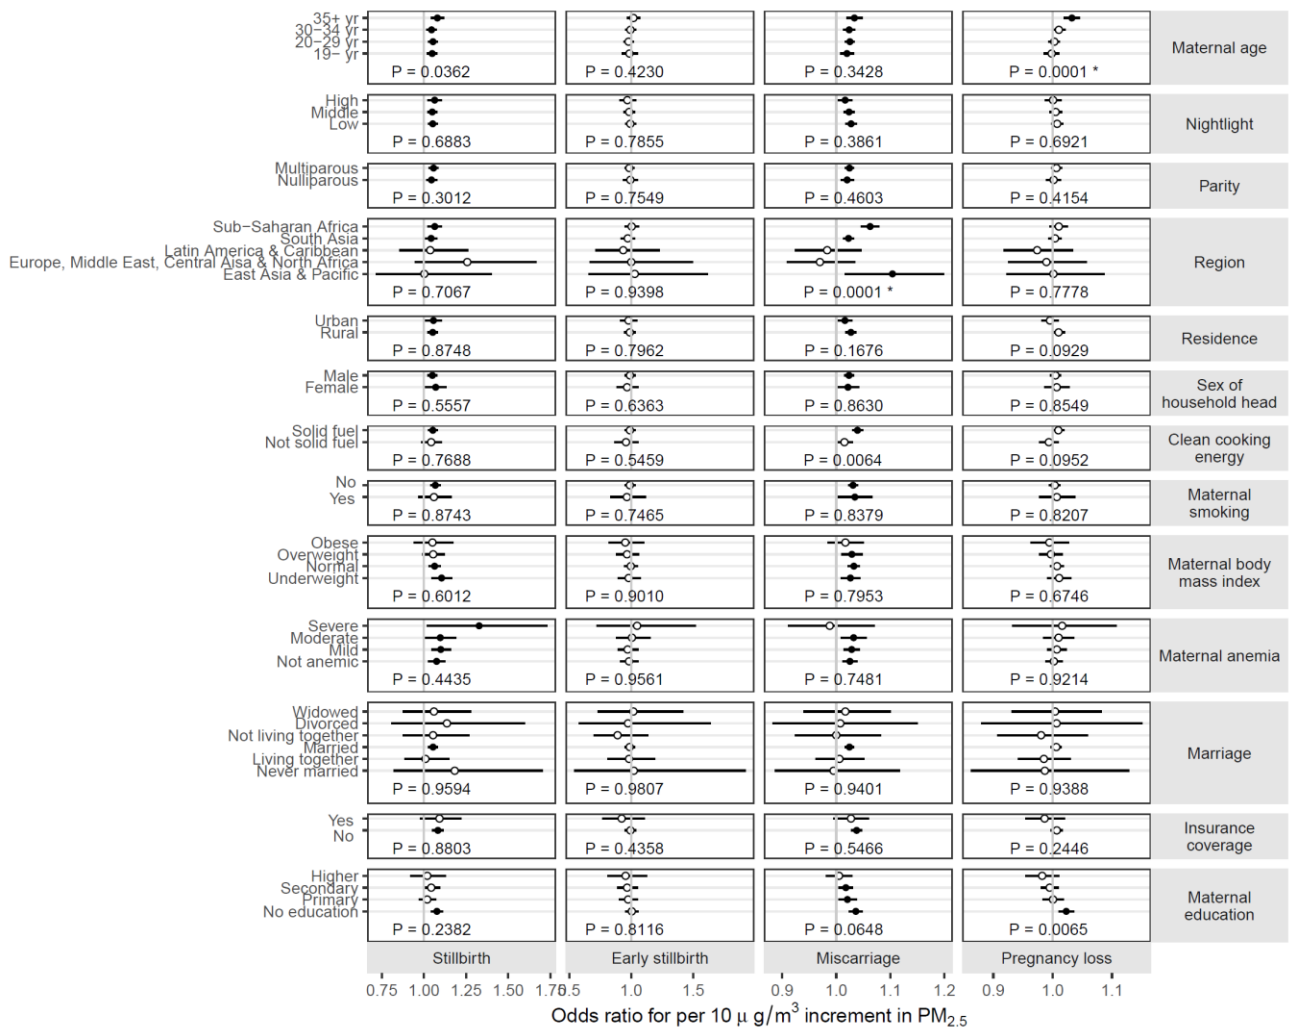

13

14 Supplementary Fig. 3 The subpopulation-specific linear associations between  $\text{PM}_{2.5}$  exposure and stillbirth or  
 15 secondary outcomes, including early stillbirth, miscarriage and pregnancy loss. The nightlight was classified as  
 16 low ( $\leq 4$  DN), middle ( $4 - 20.5$  DN), or high ( $> 20.5$  DN) level group. The dots are point estimates and the error  
 17 bars are corresponding 95% confidence intervals. The original p-values for Wald tests on interaction effects are  
 18 shown in each panel. The stars (\*) indicate for statistically significant differences after Bonferroni corrections  
 19 for multiple comparisons.

20

■ Stillbirth ■ Early stillbirth ■ Miscarriage ■ Pregnancy loss

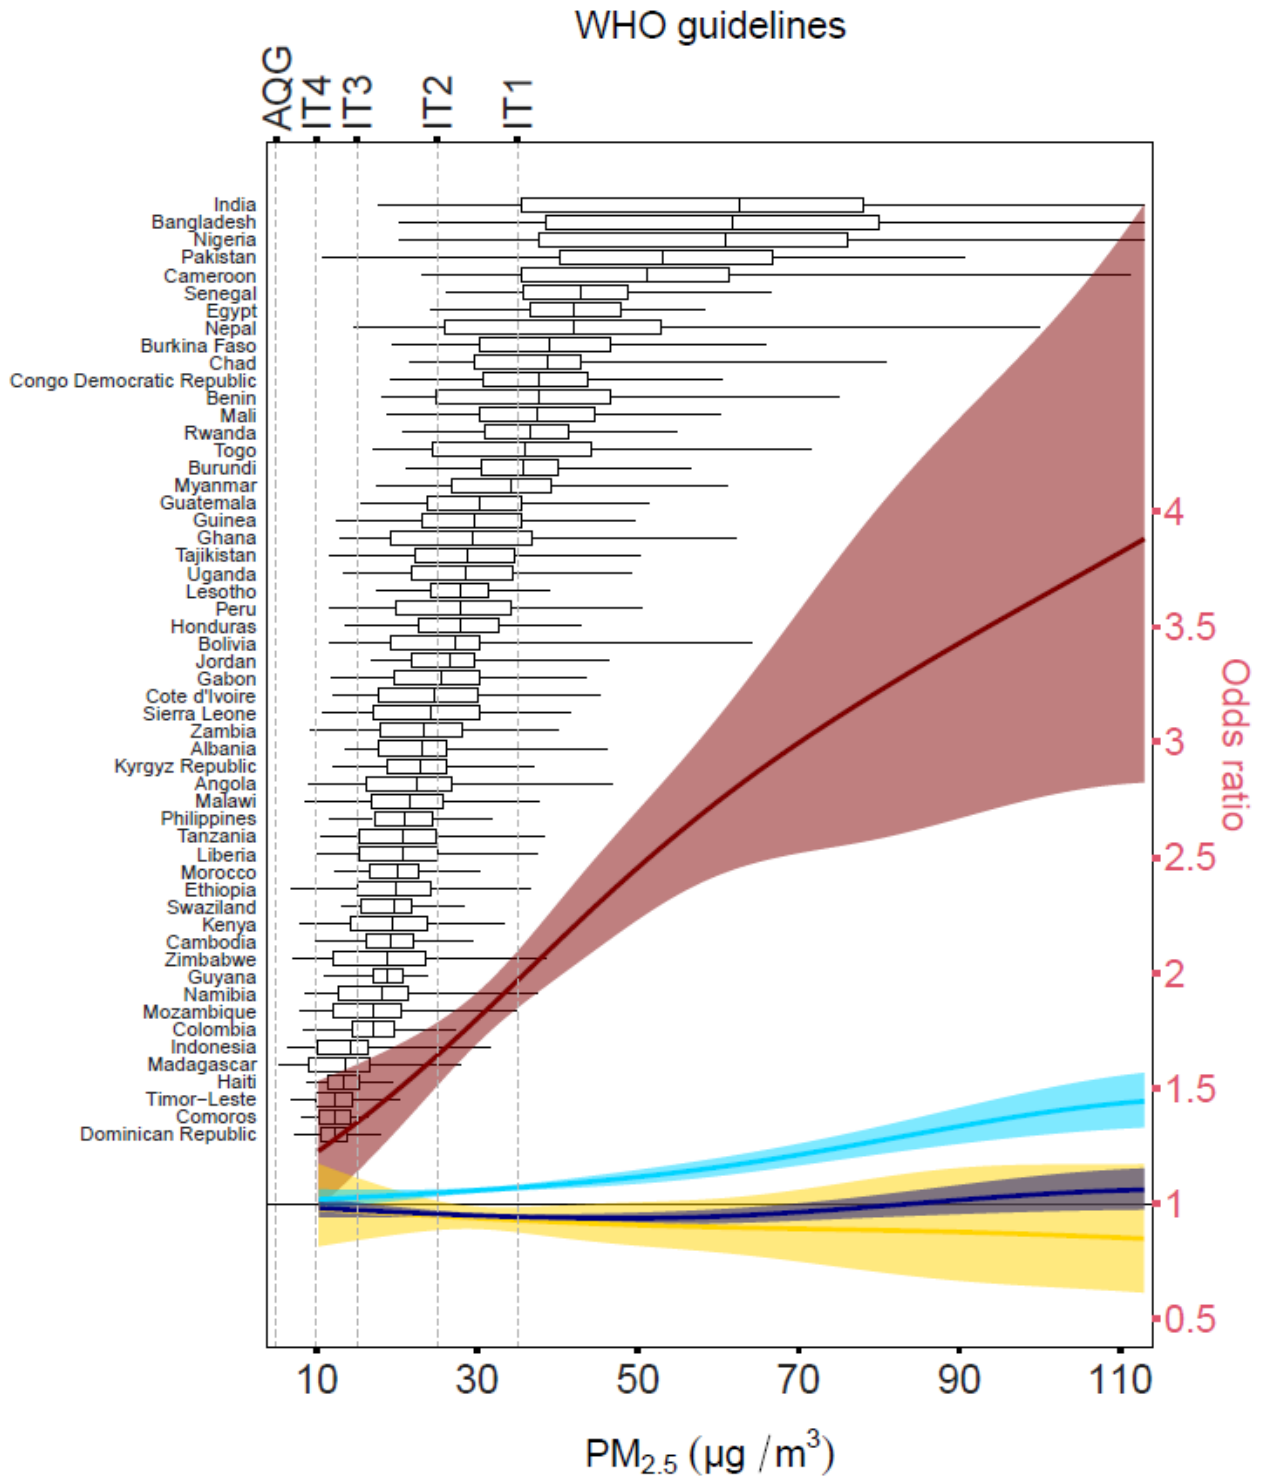

21

22 Supplementary Fig. 4 The nonlinear association between PM<sub>2.5</sub> and stillbirth, early stillbirth, miscarriage or  
 23 pregnancy loss for all maternal ages. The corresponding PM<sub>2.5</sub> exposures for pregnancy loss in those countries  
 24 are shown by the boxplots (The centre bars are medians; the box bounds and whiskers indicate for ranges from  
 25 25<sup>th</sup> to 75<sup>th</sup> and from 2.5<sup>th</sup> to 97.5<sup>th</sup> percentile, respectively.). The colored ribbons are the pointwise 95%  
 26 confidence intervals.

19- yr 20-29 yr 30-34 yr 35+ yr

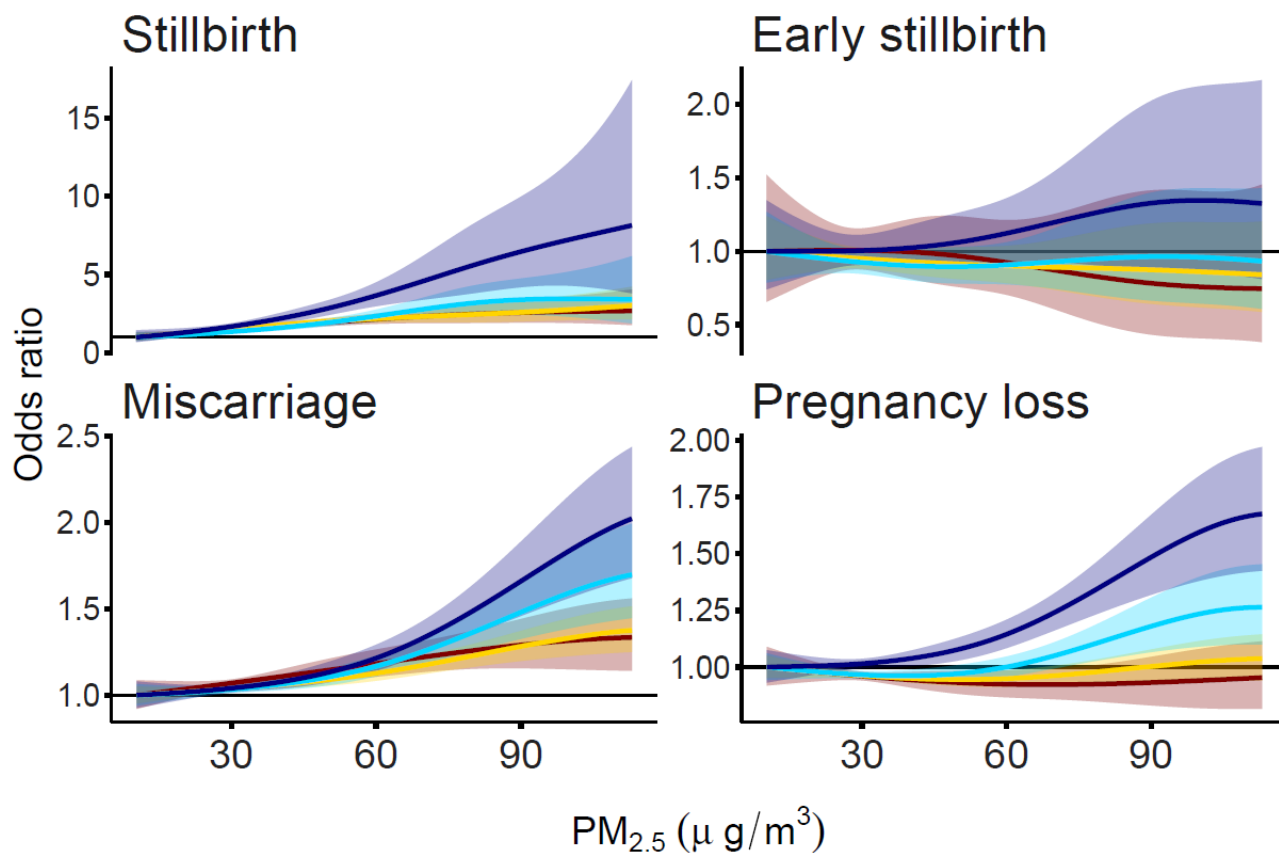

27

28 Supplementary Fig. 5 The nonlinear association between PM<sub>2.5</sub> and stillbirth, early stillbirth, miscarriage or  
 29 pregnancy loss, specifically for four maternal age groups. The corresponding PM<sub>2.5</sub> exposures for pregnancy  
 30 loss in those countries are shown by the boxplots. The colored ribbons are the pointwise 95% confidence  
 31 intervals.

32

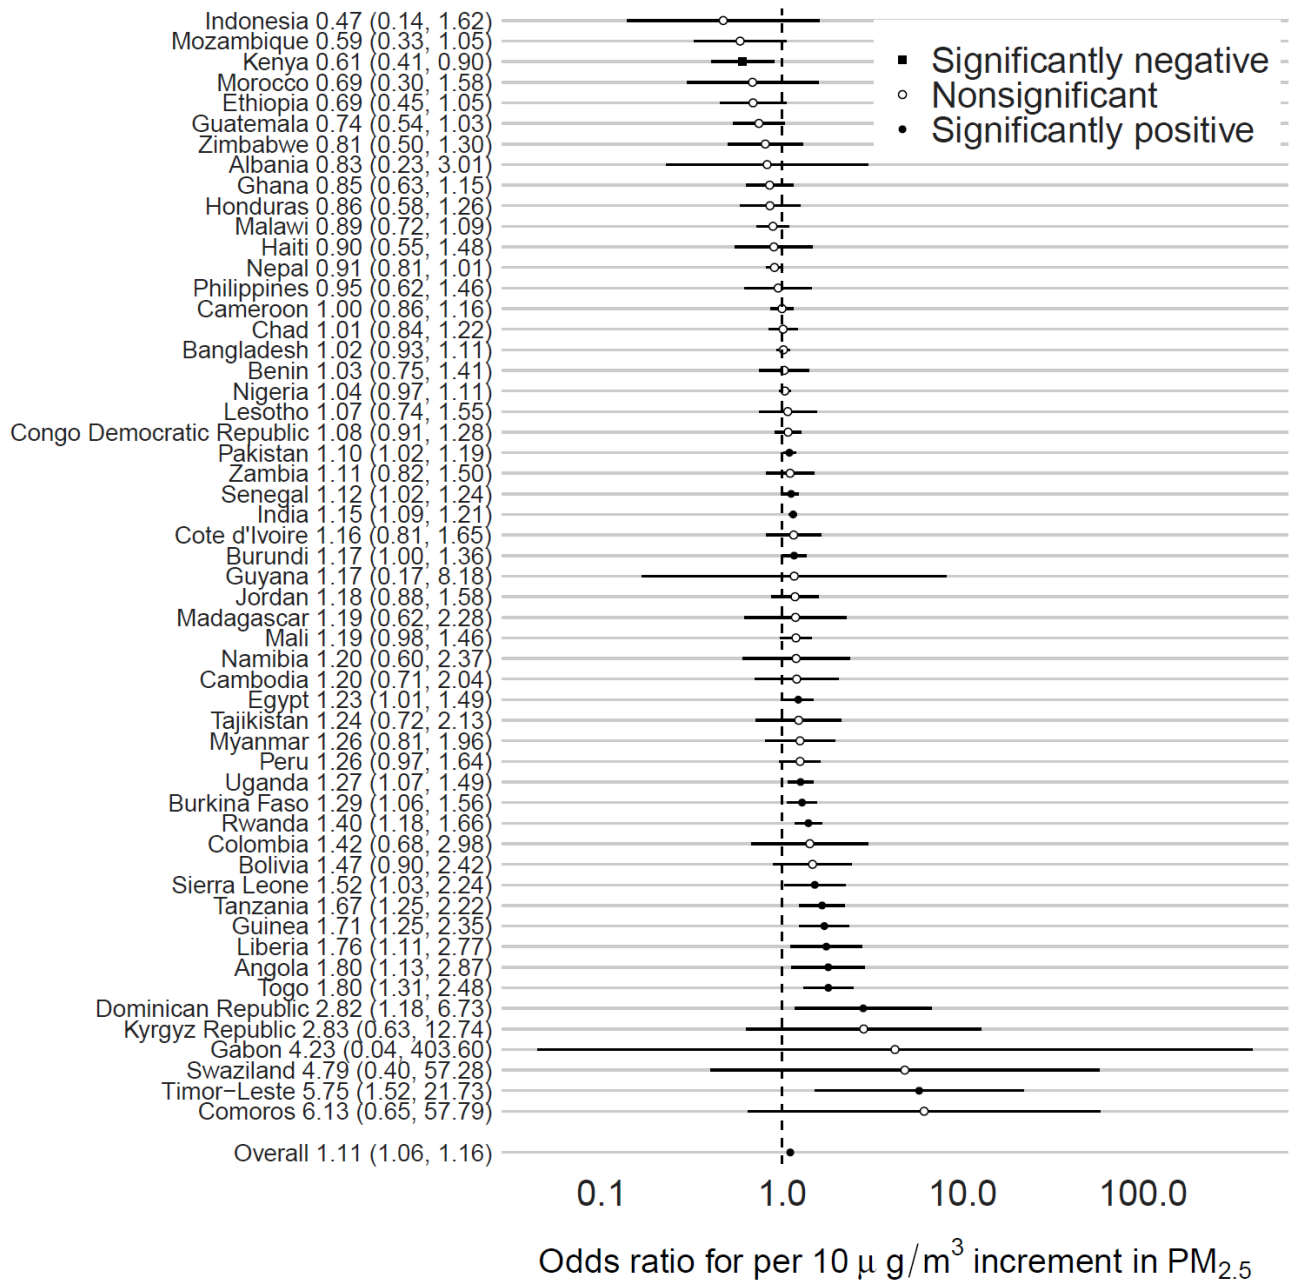

33

34 Supplementary Fig. 6 The linear association between PM<sub>2.5</sub> and stillbirth, estimated by countries. The dots are  
 35 point estimates, and the error bars are corresponding 95% confidence intervals.

36

37

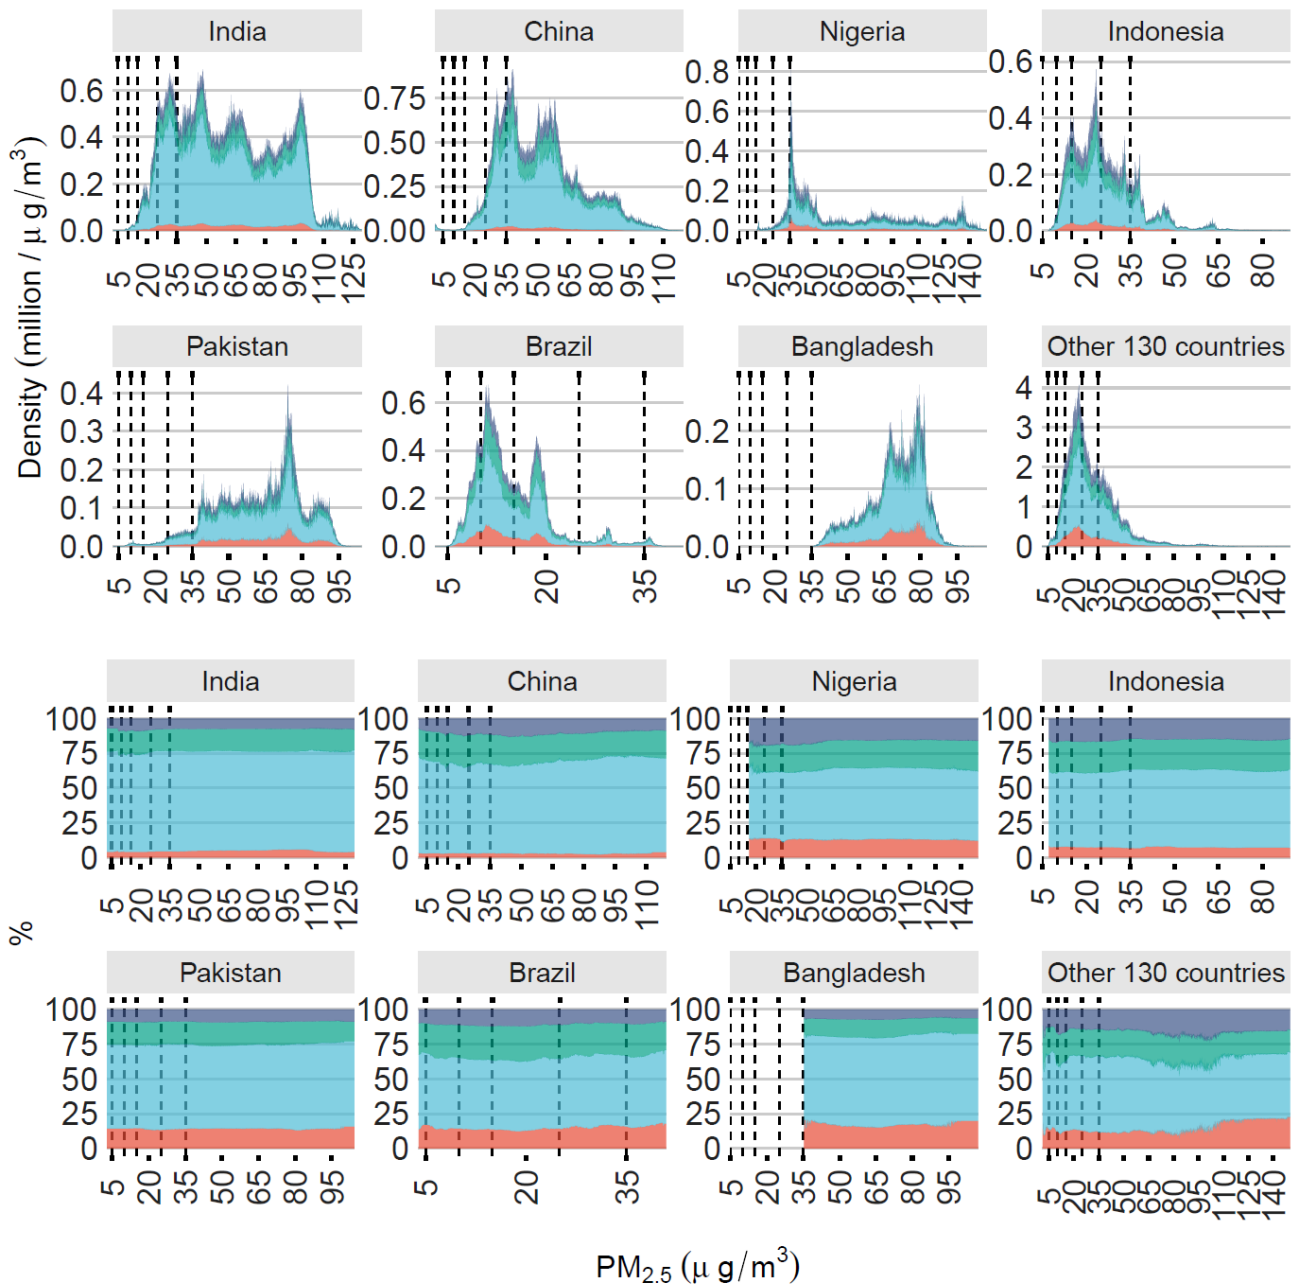

38

39 Supplementary Fig. 7 Distributions (top) and relative fractions (bottom) of age-specific populations at risk (i.e.,  
 40 pregnancies stratified by maternal ages) by different PM<sub>2.5</sub> exposure levels among each of the seven countries  
 41 with the largest number of pregnancies.

42

43

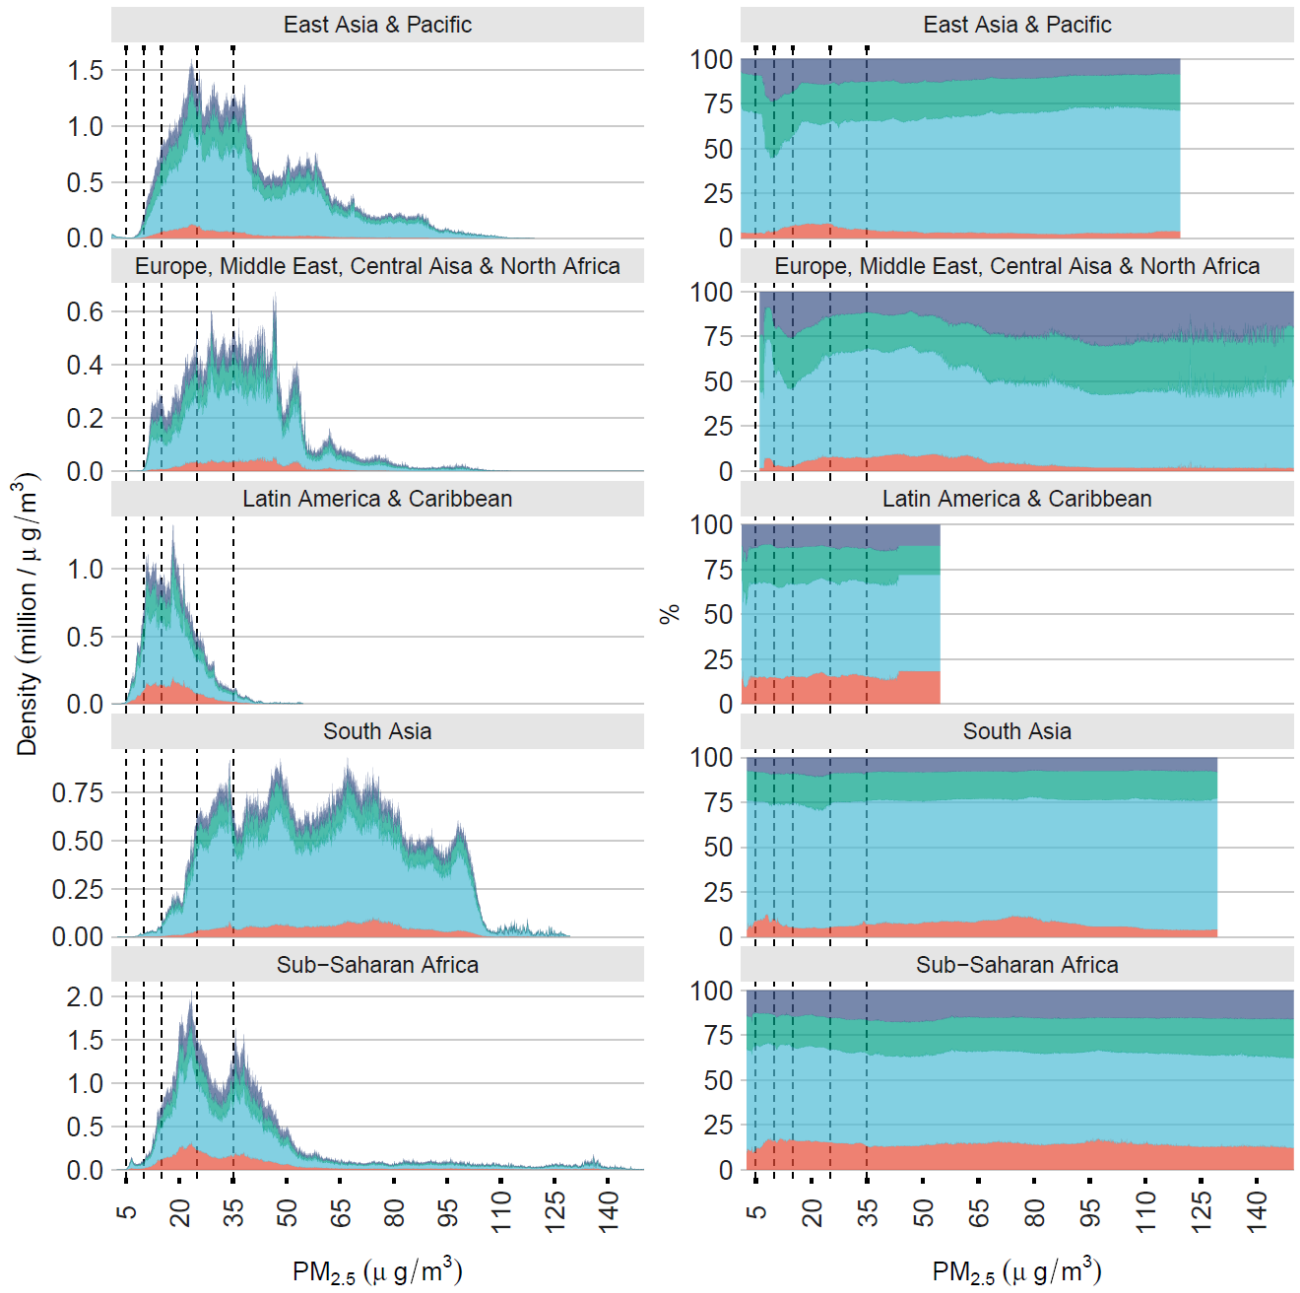

44

45 Supplementary Fig. 8 Distributions (left) and relative fractions (right) of age-specific populations at risk (i.e.,  
 46 pregnancies stratified by maternal ages) by different PM<sub>2.5</sub> exposure levels among each of the five studied  
 47 regions.

48



(a)

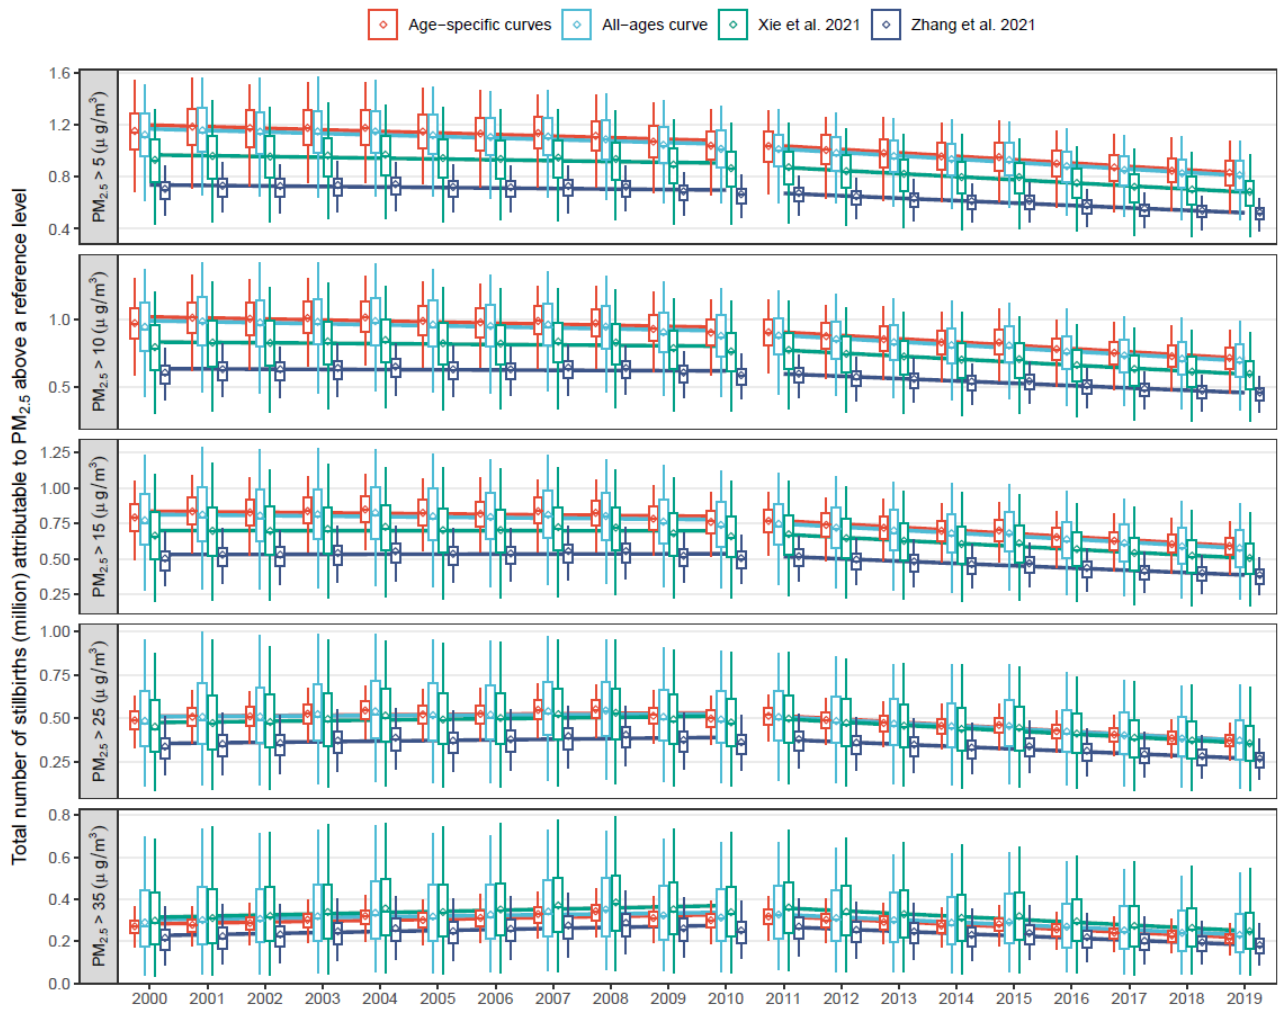

52 (b)

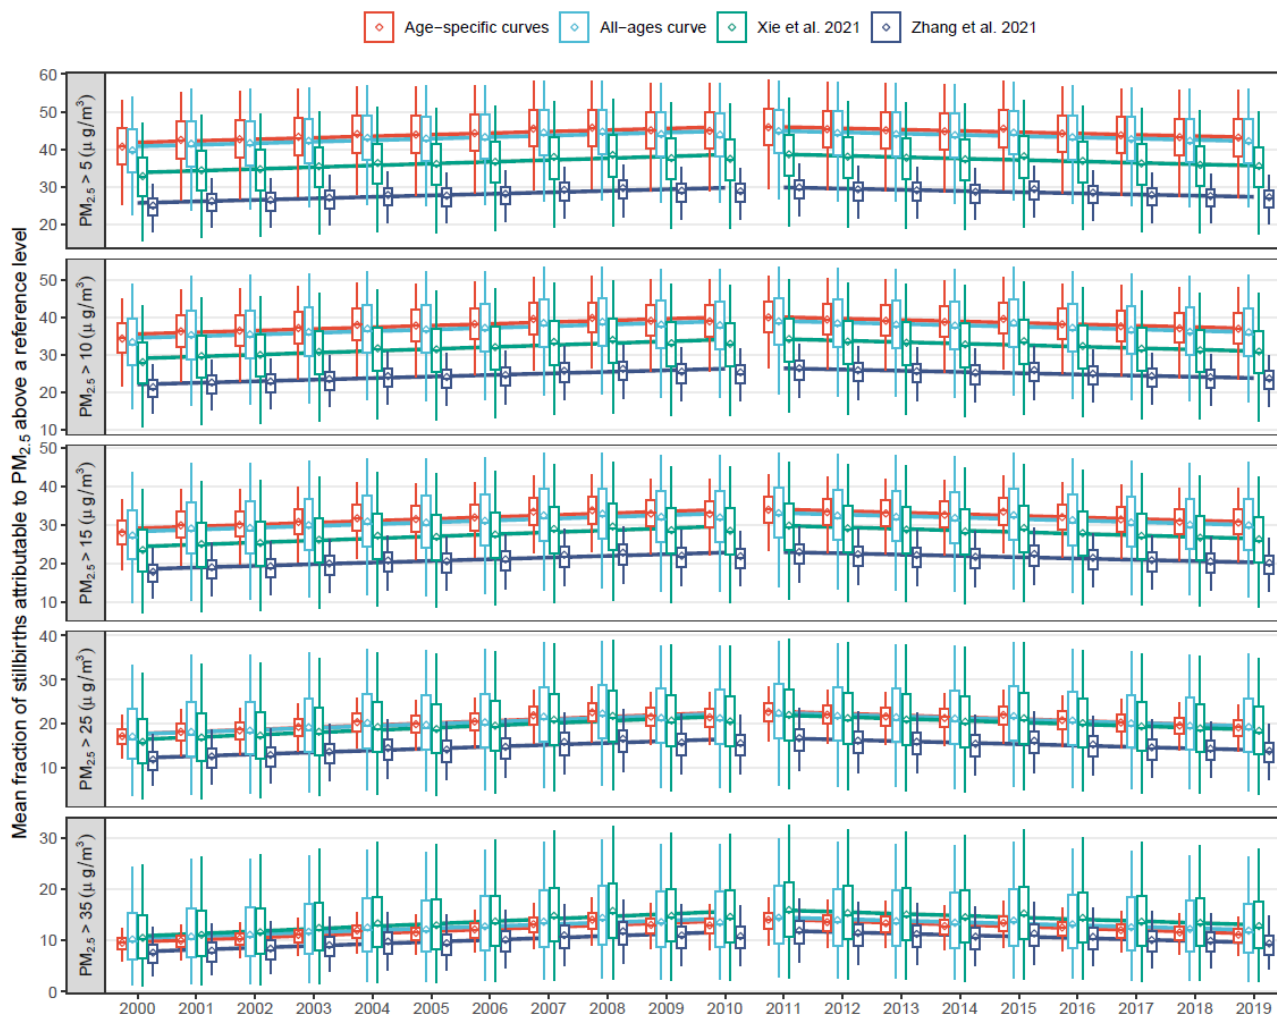

53

54 Supplementary Fig. 9 The total number (a) or average fraction (b) of stillbirths attributable to PM<sub>2.5</sub> exposure  
55 from 2000 to 2019 for the 137 countries, estimated by different exposure-response curves. The boxplots show  
56 the distributions of the Monte Carlo simulations. The centre diamond dots and bars are means and medians,  
57 respectively. The box bounds and whiskers indicate for ranges from 25<sup>th</sup> to 75<sup>th</sup> and from 2.5<sup>th</sup> to 97.5<sup>th</sup>  
58 percentile, respectively.

59

(a)

Fraction (%) of stillbirths attributable to  $PM_{2.5} > 10$  ( $\mu g/m^3$ ), estimated by age-specific curves

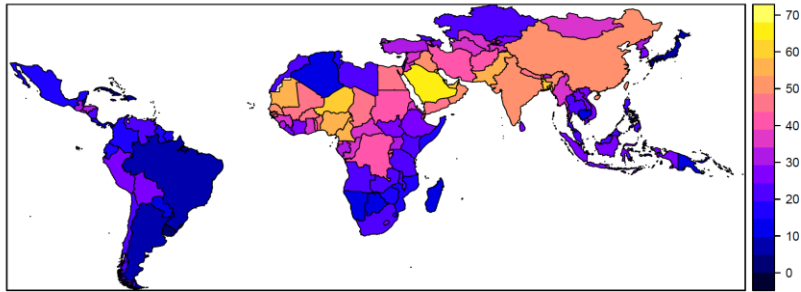

60

(b)

Fraction (%) of stillbirths attributable to  $PM_{2.5} > 10$  ( $\mu g/m^3$ ), estimated by all-ages curves

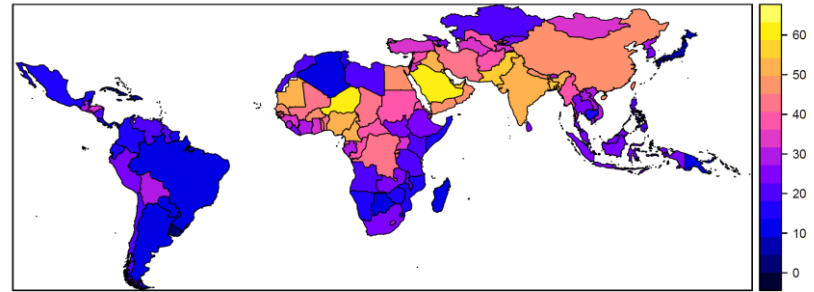

61

(c)

Fraction (%) of stillbirths attributable to  $PM_{2.5} > 10$  ( $\mu g/m^3$ ), estimated by Zhang et al. 2021

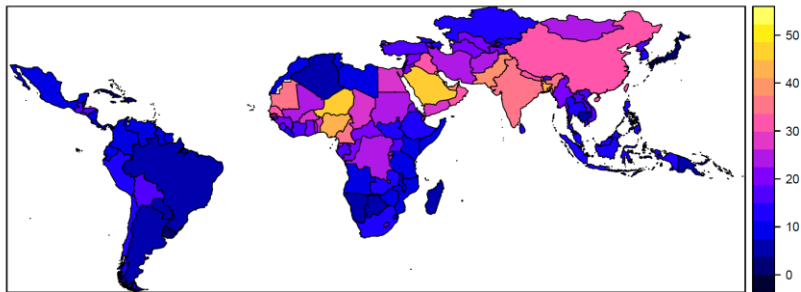

62

(d)

Fraction (%) of stillbirths attributable to  $PM_{2.5} > 10$  ( $\mu g/m^3$ ), estimated by Xie et al. 2021

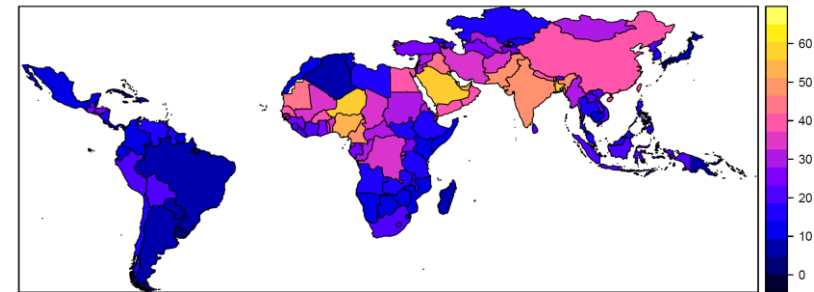

63

Supplementary Fig. 10 The spatial distribution of  $PM_{2.5}$ -related stillbirths, estimated by different exposure-response curves.

| <b>ISO</b> | <b>NAME</b>          | <b>ISO</b> | <b>NAME</b>         | <b>ISO</b> | <b>NAME</b>              |
|------------|----------------------|------------|---------------------|------------|--------------------------|
| <b>AFG</b> | Afghanistan          | <b>GNB</b> | Guinea-Bissau       | <b>OMN</b> | Oman                     |
| <b>AGO</b> | Angola               | <b>GNQ</b> | Eq. Guinea          | <b>PAK</b> | Pakistan                 |
| <b>ARE</b> | United Arab Emirates | <b>GRD</b> | Grenada             | <b>PAN</b> | Panama                   |
| <b>ARG</b> | Argentina            | <b>GTM</b> | Guatemala           | <b>PER</b> | Peru                     |
| <b>ARM</b> | Armenia              | <b>GUY</b> | Guyana              | <b>PHL</b> | Philippines              |
| <b>ATG</b> | Antigua and Barb.    | <b>HND</b> | Honduras            | <b>PNG</b> | Papua New Guinea         |
| <b>AZE</b> | Azerbaijan           | <b>HTI</b> | Haiti               | <b>PRK</b> | North Korea              |
| <b>BDI</b> | Burundi              | <b>IDN</b> | Indonesia           | <b>PRY</b> | Paraguay                 |
| <b>BEN</b> | Benin                | <b>IND</b> | India               | <b>PSE</b> | Palestine                |
| <b>BFA</b> | Burkina Faso         | <b>IRN</b> | Iran                | <b>QAT</b> | Qatar                    |
| <b>BGD</b> | Bangladesh           | <b>IRQ</b> | Iraq                | <b>RWA</b> | Rwanda                   |
| <b>BHR</b> | Bahrain              | <b>ISR</b> | Israel              | <b>SAU</b> | Saudi Arabia             |
| <b>BHS</b> | Bahamas              | <b>JAM</b> | Jamaica             | <b>SDN</b> | Sudan                    |
| <b>BLZ</b> | Belize               | <b>JOR</b> | Jordan              | <b>SEN</b> | Senegal                  |
| <b>BOL</b> | Bolivia              | <b>JPN</b> | Japan               | <b>SGP</b> | Singapore                |
| <b>BRA</b> | Brazil               | <b>KAZ</b> | Kazakhstan          | <b>SLB</b> | Solomon Is.              |
| <b>BRB</b> | Barbados             | <b>KEN</b> | Kenya               | <b>SLE</b> | Sierra Leone             |
| <b>BRN</b> | Brunei               | <b>KGZ</b> | Kyrgyzstan          | <b>SLV</b> | El Salvador              |
| <b>BTN</b> | Bhutan               | <b>KHM</b> | Cambodia            | <b>SOM</b> | Somalia                  |
| <b>BWA</b> | Botswana             | <b>KNA</b> | St. Kitts and Nevis | <b>SSD</b> | S. Sudan                 |
| <b>CAF</b> | Central African Rep. | <b>KOR</b> | South Korea         | <b>STP</b> | S ão Tom é and Pr íncipe |
| <b>CHL</b> | Chile                | <b>KWT</b> | Kuwait              | <b>SUR</b> | Suriname                 |
| <b>CHN</b> | China                | <b>LAO</b> | Laos                | <b>SWZ</b> | eSwatini                 |
| <b>CIV</b> | Cote d'Ivoire        | <b>LBN</b> | Lebanon             | <b>SYC</b> | Seychelles               |
| <b>CMR</b> | Cameroon             | <b>LBR</b> | Liberia             | <b>SYR</b> | Syria                    |
| <b>COD</b> | Dem. Rep. Congo      | <b>LBY</b> | Libya               | <b>TCD</b> | Chad                     |
| <b>COG</b> | Congo                | <b>LCA</b> | Saint Lucia         | <b>TGO</b> | Togo                     |
| <b>COL</b> | Colombia             | <b>LKA</b> | Sri Lanka           | <b>THA</b> | Thailand                 |
| <b>COM</b> | Comoros              | <b>LSO</b> | Lesotho             | <b>TJK</b> | Tajikistan               |
| <b>CPV</b> | Cabo Verde           | <b>MAR</b> | Morocco             | <b>TKM</b> | Turkmenistan             |
| <b>CRI</b> | Costa Rica           | <b>MDG</b> | Madagascar          | <b>TLS</b> | Timor-Leste              |
| <b>CUB</b> | Cuba                 | <b>MDV</b> | Maldives            | <b>TTO</b> | Trinidad and Tobago      |
| <b>CYP</b> | Cyprus               | <b>MEX</b> | Mexico              | <b>TUN</b> | Tunisia                  |
| <b>DJI</b> | Djibouti             | <b>MLI</b> | Mali                | <b>TUR</b> | Turkey                   |
| <b>DMA</b> | Dominica             | <b>MMR</b> | Myanmar             | <b>TZA</b> | Tanzania                 |
| <b>DOM</b> | Dominican Rep.       | <b>MNG</b> | Mongolia            | <b>UGA</b> | Uganda                   |
| <b>DZA</b> | Algeria              | <b>MOZ</b> | Mozambique          | <b>URY</b> | Uruguay                  |
| <b>ECU</b> | Ecuador              | <b>MRT</b> | Mauritania          | <b>UZB</b> | Uzbekistan               |
| <b>EGY</b> | Egypt                | <b>MUS</b> | Mauritius           | <b>VCT</b> | St. Vin. and Gren.       |
| <b>ERI</b> | Eritrea              | <b>MWI</b> | Malawi              | <b>VEN</b> | Venezuela                |
| <b>ETH</b> | Ethiopia             | <b>MYS</b> | Malaysia            | <b>VNM</b> | Vietnam                  |
| <b>GAB</b> | Gabon                | <b>NAM</b> | Namibia             | <b>YEM</b> | Yemen                    |
| <b>GEO</b> | Georgia              | <b>NER</b> | Niger               | <b>ZAF</b> | South Africa             |
| <b>GHA</b> | Ghana                | <b>NGA</b> | Nigeria             | <b>ZMB</b> | Zambia                   |
| <b>GIN</b> | Guinea               | <b>NIC</b> | Nicaragua           | <b>ZWE</b> | Zimbabwe                 |
| <b>GMB</b> | Gambia               | <b>NPL</b> | Nepal               |            |                          |

Supplementary Table 2 Summary of the constant variables of the analyzed mothers in the epidemiological study to establish the exposure-response curves between PM<sub>2.5</sub> and stillbirth or other similar outcomes.

| Variable                 | Group                                            | Stillbirth     | Early stillbirth | Miscarriage   | Pregnancy loss |
|--------------------------|--------------------------------------------------|----------------|------------------|---------------|----------------|
|                          |                                                  | N (percentage) |                  |               |                |
| Total                    |                                                  | 13,870(100%)   | 9,783(100%)      | 85,548(100%)  | 109,201(100%)  |
| Region                   | East Asia & Pacific                              | 487(3.5%)      | 499(5.1%)        | 7,157(8.4%)   | 8,143(7.5%)    |
|                          | Europe, Middle East, Central Asia & North Africa | 532(3.8%)      | 635(6.5%)        | 10,254(12.0%) | 11,421(10.5%)  |
|                          | Latin America & Caribbean                        | 1,064(7.7%)    | 958(9.8%)        | 10,237(12.0%) | 12,259(11.2%)  |
|                          | South Asia                                       | 4,755(34.3%)   | 2,875(29.4%)     | 31,227(36.5%) | 38,857(35.6%)  |
|                          | Sub-Saharan Africa                               | 7,032(50.7%)   | 4,816(49.2%)     | 26,673(31.2%) | 38,521(35.3%)  |
| Residence                | Rural                                            | 10,139(73.1%)  | 6,489(66.3%)     | 50,018(58.5%) | 66,646(61.0%)  |
|                          | Urban                                            | 3,731(26.9%)   | 3,294(33.7%)     | 35,530(41.5%) | 42,555(39.0%)  |
| Sex of household head    | Female                                           | 2,225(16.0%)   | 1,782(18.2%)     | 14,681(17.2%) | 18,688(17.1%)  |
|                          | Male                                             | 11,645(84.0%)  | 8,001(81.8%)     | 70,867(82.8%) | 90,513(82.9%)  |
| Type of cooking energy   | Not solid fuel                                   | 2,219(16.0%)   | 2,237(22.9%)     | 29,817(34.9%) | 34,273(31.4%)  |
|                          | Solid fuel                                       | 10,947(78.9%)  | 6,939(70.9%)     | 49,592(58.0%) | 67,478(61.8%)  |
|                          | Unknown                                          | 704(5.1%)      | 607(6.2%)        | 6,139(7.2%)   | 7,450(6.8%)    |
| Smoking                  | Yes                                              | 806(5.8%)      | 636(6.5%)        | 6,045(7.1%)   | 7,487(6.9%)    |
|                          | No                                               | 11,199(80.7%)  | 8,008(81.9%)     | 68,892(80.5%) | 88,099(80.7%)  |
|                          | Unknown                                          | 1,865(13.4%)   | 1,139(11.6%)     | 10,611(12.4%) | 13,615(12.5%)  |
| Maternal body mass index | Underweight                                      | 1,339(9.7%)    | 918(9.4%)        | 7,319(8.6%)   | 9,576(8.8%)    |
|                          | Normal                                           | 5,878(42.4%)   | 4,063(41.5%)     | 35,304(41.3%) | 45,245(41.4%)  |
|                          | Overweight                                       | 1,638(11.8%)   | 1,300(13.3%)     | 14,006(16.4%) | 16,944(15.5%)  |
|                          | Obese                                            | 753(5.4%)      | 628(6.4%)        | 6,612(7.7%)   | 7,993(7.3%)    |
|                          | Unknown                                          | 4,262(30.7%)   | 2,874(29.4%)     | 22,307(26.1%) | 29,443(27.0%)  |
| Maternal anemia          | Mild                                             | 2,218(16.0%)   | 1,477(15.1%)     | 15,171(17.7%) | 18,866(17.3%)  |
|                          | Moderate                                         | 843(6.1%)      | 556(5.7%)        | 4,913(5.7%)   | 6,312(5.8%)    |
|                          | Not anemic                                       | 3,396(24.5%)   | 2,470(25.2%)     | 25,434(29.7%) | 31,300(28.7%)  |
|                          | Severe                                           | 97(0.7%)       | 57(0.6%)         | 379(0.4%)     | 533(0.5%)      |
|                          | Unknown                                          | 7,316(52.7%)   | 5,223(53.4%)     | 39,651(46.3%) | 52,190(47.8%)  |
| Marriage                 | Divorced                                         | 173(1.2%)      | 153(1.6%)        | 1,091(1.3%)   | 1,417(1.3%)    |
|                          | Living together                                  | 1,380(9.9%)    | 1,230(12.6%)     | 9,826(11.5%)  | 12,436(11.4%)  |
|                          | Married                                          | 11,575(83.5%)  | 7,701(78.7%)     | 69,914(81.7%) | 89,190(81.7%)  |
|                          | Never married                                    | 179(1.3%)      | 204(2.1%)        | 1,345(1.6%)   | 1,728(1.6%)    |
|                          | Not living together                              | 386(2.8%)      | 362(3.7%)        | 2,542(3.0%)   | 3,290(3.0%)    |
|                          | Widowed                                          | 177(1.3%)      | 133(1.4%)        | 829(1.0%)     | 1,139(1.0%)    |
|                          | Unknown                                          |                |                  | 1(0.0%)       | 1(0.0%)        |
| Insurance coverage       | No                                               | 8,034(57.9%)   | 5,693(58.2%)     | 47,267(55.3%) | 60,994(55.9%)  |
|                          | Yes                                              | 796(5.7%)      | 752(7.7%)        | 9,047(10.6%)  | 10,595(9.7%)   |
|                          | Unknown                                          | 5,040(36.3%)   | 3,338(34.1%)     | 29,234(34.2%) | 37,612(34.4%)  |
|                          | Higher                                           | 557(4.0%)      | 625(6.4%)        | 9,580(11.2%)  | 10,762(9.9%)   |

|                                                  |              |                                                |                          |                          |                          |
|--------------------------------------------------|--------------|------------------------------------------------|--------------------------|--------------------------|--------------------------|
| Maternal education                               | No education | 5,504(39.7%)                                   | 3,216(32.9%)             | 20,415(23.9%)            | 29,135(26.7%)            |
|                                                  | Primary      | 4,548(32.8%)                                   | 3,093(31.6%)             | 22,786(26.6%)            | 30,427(27.9%)            |
|                                                  | Secondary    | 3,261(23.5%)                                   | 2,849(29.1%)             | 32,766(38.3%)            | 38,876(35.6%)            |
|                                                  | Unknown      |                                                |                          | 1(0.0%)                  | 1(0.0%)                  |
|                                                  |              | Mean (Standard Deviation, Interquartile Range) |                          |                          |                          |
| Time intervals between case and controls (years) |              | 3.81 (2.45, 1.96 ~ 5.14)                       | 3.86 (2.49, 1.96 ~ 5.25) | 3.92 (2.69, 1.83 ~ 5.42) | 3.90 (2.65, 1.88 ~ 5.36) |

70

71 Supplementary Table 3 Summary of exposure to PM<sub>2.5</sub> among the 137 studied countries for the population at  
72 risk of stillbirth.

| ISO | Age group | PM <sub>2.5</sub> average (µg/m <sup>3</sup> ) | Percentage of pregnancies exposed to PM <sub>2.5</sub> > C <sub>0</sub> µg/m <sup>3</sup> |                     |                     |                     |                     |
|-----|-----------|------------------------------------------------|-------------------------------------------------------------------------------------------|---------------------|---------------------|---------------------|---------------------|
|     |           |                                                | C <sub>0</sub> = 5                                                                        | C <sub>0</sub> = 10 | C <sub>0</sub> = 15 | C <sub>0</sub> = 25 | C <sub>0</sub> = 35 |
| ALL | All ages  | 43.24                                          | 99.96                                                                                     | 98.87               | 93.51               | 73.16               | 53.69               |
| ALL | < 20 yr   | 40.09                                          | 99.98                                                                                     | 98.4                | 91.77               | 65.85               | 46.45               |
| ALL | 20-29 yr  | 44.8                                           | 99.96                                                                                     | 99                  | 94.43               | 75.73               | 56.54               |
| ALL | 30-34 yr  | 41.84                                          | 99.96                                                                                     | 98.73               | 92.46               | 71.21               | 51.39               |
| ALL | > 34 yr   | 40.36                                          | 99.97                                                                                     | 98.86               | 92.08               | 69.42               | 49.11               |
| AFG | All ages  | 39.31                                          | 100                                                                                       | 99.97               | 99.82               | 94.29               | 55.59               |
| AFG | < 20 yr   | 38.97                                          | 100                                                                                       | 99.97               | 99.84               | 94.67               | 53.53               |
| AFG | 20-29 yr  | 39.35                                          | 100                                                                                       | 99.97               | 99.83               | 94.35               | 55.64               |
| AFG | 30-34 yr  | 39.67                                          | 100                                                                                       | 99.97               | 99.82               | 94.24               | 57.99               |
| AFG | > 34 yr   | 39.08                                          | 100                                                                                       | 99.97               | 99.8                | 93.71               | 54.8                |
| AGO | All ages  | 21.59                                          | 100                                                                                       | 99.71               | 88.54               | 21.31               | 2.46                |
| AGO | < 20 yr   | 21.36                                          | 100                                                                                       | 99.71               | 87.92               | 19.73               | 2.19                |
| AGO | 20-29 yr  | 21.51                                          | 100                                                                                       | 99.7                | 88.17               | 21.1                | 2.36                |
| AGO | 30-34 yr  | 21.84                                          | 100                                                                                       | 99.73               | 89.76               | 22.53               | 2.66                |
| AGO | > 34 yr   | 21.79                                          | 100                                                                                       | 99.75               | 89.06               | 22.35               | 2.82                |
| ARE | All ages  | 62.29                                          | 100                                                                                       | 100                 | 100                 | 100                 | 100                 |
| ARE | < 20 yr   | 62.29                                          | 100                                                                                       | 100                 | 100                 | 100                 | 100                 |
| ARE | 20-29 yr  | 62.29                                          | 100                                                                                       | 100                 | 100                 | 100                 | 100                 |
| ARE | 30-34 yr  | 62.29                                          | 100                                                                                       | 100                 | 100                 | 100                 | 100                 |
| ARE | > 34 yr   | 62.29                                          | 100                                                                                       | 100                 | 100                 | 100                 | 100                 |
| ARG | All ages  | 14.4                                           | 100                                                                                       | 95.92               | 35.25               | 0.78                | 0                   |
| ARG | < 20 yr   | 14.49                                          | 100                                                                                       | 95.89               | 36.81               | 0.78                | 0                   |
| ARG | 20-29 yr  | 14.39                                          | 100                                                                                       | 95.92               | 35.23               | 0.74                | 0                   |
| ARG | 30-34 yr  | 14.41                                          | 100                                                                                       | 95.99               | 35.06               | 0.83                | 0                   |
| ARG | > 34 yr   | 14.33                                          | 100                                                                                       | 95.86               | 34.24               | 0.86                | 0                   |
| ARM | All ages  | 32.36                                          | 100                                                                                       | 100                 | 100                 | 92.16               | 43.94               |
| ARM | < 20 yr   | 32.18                                          | 100                                                                                       | 100                 | 100                 | 91.69               | 42.48               |
| ARM | 20-29 yr  | 32.37                                          | 100                                                                                       | 100                 | 100                 | 92.23               | 43.92               |
| ARM | 30-34 yr  | 32.42                                          | 100                                                                                       | 100                 | 100                 | 92.09               | 44.69               |
| ARM | > 34 yr   | 32.33                                          | 100                                                                                       | 100                 | 100                 | 91.92               | 43.9                |
| ATG | All ages  | 13.37                                          | 100                                                                                       | 99.69               | 0.26                | 0                   | 0                   |

| ISO | Age group | PM <sub>2.5</sub> average<br>(µg/m <sup>3</sup> ) | Percentage of pregnancies exposed to PM <sub>2.5</sub> > C <sub>0</sub> µg/m <sup>3</sup> |                     |                     |                     |                     |
|-----|-----------|---------------------------------------------------|-------------------------------------------------------------------------------------------|---------------------|---------------------|---------------------|---------------------|
|     |           |                                                   | C <sub>0</sub> = 5                                                                        | C <sub>0</sub> = 10 | C <sub>0</sub> = 15 | C <sub>0</sub> = 25 | C <sub>0</sub> = 35 |
| ATG | < 20 yr   | 13.37                                             | 100                                                                                       | 99.69               | 0.26                | 0                   | 0                   |
| ATG | 20-29 yr  | 13.37                                             | 100                                                                                       | 99.69               | 0.26                | 0                   | 0                   |
| ATG | 30-34 yr  | 13.37                                             | 100                                                                                       | 99.69               | 0.26                | 0                   | 0                   |
| ATG | > 34 yr   | 13.37                                             | 100                                                                                       | 99.69               | 0.26                | 0                   | 0                   |
| AZE | All ages  | 25.74                                             | 100                                                                                       | 100                 | 100                 | 57.7                | 0                   |
| AZE | < 20 yr   | 25.78                                             | 100                                                                                       | 100                 | 100                 | 58.91               | 0                   |
| AZE | 20-29 yr  | 25.74                                             | 100                                                                                       | 100                 | 100                 | 57.56               | 0                   |
| AZE | 30-34 yr  | 25.7                                              | 100                                                                                       | 100                 | 100                 | 57.01               | 0                   |
| AZE | > 34 yr   | 25.75                                             | 100                                                                                       | 100                 | 100                 | 57.96               | 0                   |
| BDI | All ages  | 37.14                                             | 100                                                                                       | 100                 | 100                 | 100                 | 74.78               |
| BDI | < 20 yr   | 37.14                                             | 100                                                                                       | 100                 | 100                 | 100                 | 74.85               |
| BDI | 20-29 yr  | 37.15                                             | 100                                                                                       | 100                 | 100                 | 100                 | 74.83               |
| BDI | 30-34 yr  | 37.13                                             | 100                                                                                       | 100                 | 100                 | 100                 | 74.7                |
| BDI | > 34 yr   | 37.12                                             | 100                                                                                       | 100                 | 100                 | 100                 | 74.66               |
| BEN | All ages  | 43.04                                             | 100                                                                                       | 100                 | 100                 | 100                 | 69.47               |
| BEN | < 20 yr   | 43.51                                             | 100                                                                                       | 100                 | 100                 | 100                 | 71.25               |
| BEN | 20-29 yr  | 43.18                                             | 100                                                                                       | 100                 | 100                 | 100                 | 69.54               |
| BEN | 30-34 yr  | 42.91                                             | 100                                                                                       | 100                 | 100                 | 100                 | 69.09               |
| BEN | > 34 yr   | 42.18                                             | 100                                                                                       | 100                 | 100                 | 100                 | 67.87               |
| BFA | All ages  | 44.88                                             | 100                                                                                       | 100                 | 100                 | 100                 | 88.76               |
| BFA | < 20 yr   | 44.86                                             | 100                                                                                       | 100                 | 100                 | 100                 | 88.59               |
| BFA | 20-29 yr  | 44.89                                             | 100                                                                                       | 100                 | 100                 | 100                 | 88.55               |
| BFA | 30-34 yr  | 44.92                                             | 100                                                                                       | 100                 | 100                 | 100                 | 89.11               |
| BFA | > 34 yr   | 44.84                                             | 100                                                                                       | 100                 | 100                 | 100                 | 89.25               |
| BGD | All ages  | 69.58                                             | 100                                                                                       | 100                 | 100                 | 100                 | 100                 |
| BGD | < 20 yr   | 69.74                                             | 100                                                                                       | 100                 | 100                 | 100                 | 100                 |
| BGD | 20-29 yr  | 69.66                                             | 100                                                                                       | 100                 | 100                 | 100                 | 100                 |
| BGD | 30-34 yr  | 69.21                                             | 100                                                                                       | 100                 | 100                 | 100                 | 100                 |
| BGD | > 34 yr   | 69.13                                             | 100                                                                                       | 100                 | 100                 | 100                 | 100                 |
| BHR | All ages  | 56.58                                             | 100                                                                                       | 100                 | 100                 | 100                 | 100                 |
| BHR | < 20 yr   | 56.58                                             | 100                                                                                       | 100                 | 100                 | 100                 | 100                 |
| BHR | 20-29 yr  | 56.58                                             | 100                                                                                       | 100                 | 100                 | 100                 | 100                 |
| BHR | 30-34 yr  | 56.58                                             | 100                                                                                       | 100                 | 100                 | 100                 | 100                 |
| BHR | > 34 yr   | 56.58                                             | 100                                                                                       | 100                 | 100                 | 100                 | 100                 |
| BHS | All ages  | 5.58                                              | 82.9                                                                                      | 0.1                 | 0                   | 0                   | 0                   |
| BHS | < 20 yr   | 5.59                                              | 82.92                                                                                     | 0.12                | 0                   | 0                   | 0                   |
| BHS | 20-29 yr  | 5.57                                              | 82.89                                                                                     | 0.08                | 0                   | 0                   | 0                   |
| BHS | 30-34 yr  | 5.58                                              | 82.89                                                                                     | 0.11                | 0                   | 0                   | 0                   |
| BHS | > 34 yr   | 5.58                                              | 82.91                                                                                     | 0.12                | 0                   | 0                   | 0                   |
| BLZ | All ages  | 17.3                                              | 100                                                                                       | 99.99               | 81.34               | 0.13                | 0                   |
| BLZ | < 20 yr   | 17.4                                              | 100                                                                                       | 99.99               | 81.42               | 0.14                | 0                   |
| BLZ | 20-29 yr  | 17.3                                              | 100                                                                                       | 99.99               | 81.42               | 0.13                | 0                   |

| ISO | Age group | PM <sub>2.5</sub> average<br>(µg/m <sup>3</sup> ) | Percentage of pregnancies exposed to PM <sub>2.5</sub> > C <sub>0</sub> µg/m <sup>3</sup> |                     |                     |                     |                     |
|-----|-----------|---------------------------------------------------|-------------------------------------------------------------------------------------------|---------------------|---------------------|---------------------|---------------------|
|     |           |                                                   | C <sub>0</sub> = 5                                                                        | C <sub>0</sub> = 10 | C <sub>0</sub> = 15 | C <sub>0</sub> = 25 | C <sub>0</sub> = 35 |
| BLZ | 30-34 yr  | 17.26                                             | 100                                                                                       | 99.99               | 81.29               | 0.12                | 0                   |
| BLZ | > 34 yr   | 17.22                                             | 100                                                                                       | 99.99               | 80.79               | 0.11                | 0                   |
| BOL | All ages  | 27.47                                             | 100                                                                                       | 99.94               | 99.63               | 59.43               | 12.51               |
| BOL | < 20 yr   | 27.53                                             | 100                                                                                       | 99.94               | 99.63               | 59.83               | 12.93               |
| BOL | 20-29 yr  | 27.54                                             | 100                                                                                       | 99.94               | 99.64               | 60                  | 12.66               |
| BOL | 30-34 yr  | 27.39                                             | 100                                                                                       | 99.94               | 99.62               | 58.78               | 12.23               |
| BOL | > 34 yr   | 27.3                                              | 100                                                                                       | 99.93               | 99.61               | 58.13               | 12.03               |
| BRA | All ages  | 14.67                                             | 99.99                                                                                     | 81.97               | 39.37               | 5.55                | 0.92                |
| BRA | < 20 yr   | 14.65                                             | 99.98                                                                                     | 81.22               | 38.26               | 6.17                | 1.01                |
| BRA | 20-29 yr  | 14.67                                             | 99.99                                                                                     | 81.76               | 39.27               | 5.65                | 0.93                |
| BRA | 30-34 yr  | 14.7                                              | 99.99                                                                                     | 82.47               | 40                  | 5.31                | 0.9                 |
| BRA | > 34 yr   | 14.65                                             | 99.99                                                                                     | 82.76               | 39.75               | 4.89                | 0.84                |
| BRB | All ages  | 16.09                                             | 100                                                                                       | 100                 | 76.88               | 0                   | 0                   |
| BRB | < 20 yr   | 16.1                                              | 100                                                                                       | 100                 | 77.32               | 0                   | 0                   |
| BRB | 20-29 yr  | 16.1                                              | 100                                                                                       | 100                 | 77.45               | 0                   | 0                   |
| BRB | 30-34 yr  | 16.06                                             | 100                                                                                       | 100                 | 76                  | 0                   | 0                   |
| BRB | > 34 yr   | 16.07                                             | 100                                                                                       | 100                 | 75.99               | 0                   | 0                   |
| BRN | All ages  | 12.35                                             | 100                                                                                       | 100                 | 0                   | 0                   | 0                   |
| BRN | < 20 yr   | 12.35                                             | 100                                                                                       | 100                 | 0                   | 0                   | 0                   |
| BRN | 20-29 yr  | 12.35                                             | 100                                                                                       | 100                 | 0                   | 0                   | 0                   |
| BRN | 30-34 yr  | 12.35                                             | 100                                                                                       | 100                 | 0                   | 0                   | 0                   |
| BRN | > 34 yr   | 12.35                                             | 100                                                                                       | 100                 | 0                   | 0                   | 0                   |
| BTN | All ages  | 28.85                                             | 100                                                                                       | 99.94               | 96.51               | 51.91               | 22.95               |
| BTN | < 20 yr   | 28.37                                             | 100                                                                                       | 99.93               | 96.34               | 49.6                | 21.95               |
| BTN | 20-29 yr  | 28.99                                             | 100                                                                                       | 99.94               | 96.6                | 52.67               | 23.16               |
| BTN | 30-34 yr  | 28.72                                             | 100                                                                                       | 99.93               | 96.43               | 51.46               | 22.86               |
| BTN | > 34 yr   | 28.64                                             | 100                                                                                       | 99.93               | 96.28               | 50.3                | 22.78               |
| BWA | All ages  | 17.71                                             | 100                                                                                       | 100                 | 80.07               | 7.68                | 0.07                |
| BWA | < 20 yr   | 17.73                                             | 100                                                                                       | 100                 | 78.4                | 8.19                | 0.08                |
| BWA | 20-29 yr  | 17.71                                             | 100                                                                                       | 100                 | 80.48               | 7.65                | 0.06                |
| BWA | 30-34 yr  | 17.7                                              | 100                                                                                       | 100                 | 80.31               | 7.52                | 0.07                |
| BWA | > 34 yr   | 17.69                                             | 100                                                                                       | 100                 | 79.49               | 7.57                | 0.07                |
| CAF | All ages  | 34.9                                              | 100                                                                                       | 100                 | 100                 | 100                 | 49.52               |
| CAF | < 20 yr   | 34.91                                             | 100                                                                                       | 100                 | 100                 | 100                 | 49.88               |
| CAF | 20-29 yr  | 34.98                                             | 100                                                                                       | 100                 | 100                 | 100                 | 50.68               |
| CAF | 30-34 yr  | 34.73                                             | 100                                                                                       | 100                 | 100                 | 100                 | 46.78               |
| CAF | > 34 yr   | 34.82                                             | 100                                                                                       | 100                 | 100                 | 100                 | 47.98               |
| CHL | All ages  | 22.97                                             | 100                                                                                       | 99.73               | 87.13               | 47.39               | 1.64                |
| CHL | < 20 yr   | 22.85                                             | 100                                                                                       | 99.72               | 86.74               | 45.81               | 1.74                |
| CHL | 20-29 yr  | 22.9                                              | 100                                                                                       | 99.73               | 86.87               | 46.76               | 1.69                |
| CHL | 30-34 yr  | 23.08                                             | 100                                                                                       | 99.73               | 87.53               | 48.51               | 1.61                |
| CHL | > 34 yr   | 23.05                                             | 100                                                                                       | 99.73               | 87.49               | 48.36               | 1.52                |



| ISO | Age group | PM <sub>2.5</sub> average<br>(µg/m <sup>3</sup> ) | Percentage of pregnancies exposed to PM <sub>2.5</sub> > C <sub>0</sub> µg/m <sup>3</sup> |                     |                     |                     |                     |
|-----|-----------|---------------------------------------------------|-------------------------------------------------------------------------------------------|---------------------|---------------------|---------------------|---------------------|
|     |           |                                                   | C <sub>0</sub> = 5                                                                        | C <sub>0</sub> = 10 | C <sub>0</sub> = 15 | C <sub>0</sub> = 25 | C <sub>0</sub> = 35 |
| CHN | All ages  | 51.11                                             | 99.81                                                                                     | 99.74               | 99.61               | 96.39               | 77.91               |
| CHN | < 20 yr   | 50.09                                             | 99.8                                                                                      | 99.73               | 99.6                | 96.14               | 76.65               |
| CHN | 20-29 yr  | 51.56                                             | 99.8                                                                                      | 99.72               | 99.6                | 96.49               | 78.13               |
| CHN | 30-34 yr  | 50.27                                             | 99.8                                                                                      | 99.73               | 99.59               | 96.11               | 77.05               |
| CHN | > 34 yr   | 50.37                                             | 99.86                                                                                     | 99.81               | 99.69               | 96.39               | 78.5                |
| CIV | All ages  | 26.73                                             | 100                                                                                       | 100                 | 100                 | 75.22               | 0.71                |
| CIV | < 20 yr   | 26.71                                             | 100                                                                                       | 100                 | 100                 | 75.38               | 0.75                |
| CIV | 20-29 yr  | 26.73                                             | 100                                                                                       | 100                 | 100                 | 74.99               | 0.68                |
| CIV | 30-34 yr  | 26.71                                             | 100                                                                                       | 100                 | 100                 | 74.73               | 0.73                |
| CIV | > 34 yr   | 26.79                                             | 100                                                                                       | 100                 | 100                 | 76.34               | 0.77                |
| CMR | All ages  | 58.6                                              | 100                                                                                       | 100                 | 100                 | 100                 | 94.51               |
| CMR | < 20 yr   | 59.26                                             | 100                                                                                       | 100                 | 100                 | 100                 | 94.35               |
| CMR | 20-29 yr  | 58.22                                             | 100                                                                                       | 100                 | 100                 | 100                 | 94.57               |
| CMR | 30-34 yr  | 58.88                                             | 100                                                                                       | 100                 | 100                 | 100                 | 94.67               |
| CMR | > 34 yr   | 58.89                                             | 100                                                                                       | 100                 | 100                 | 100                 | 94.25               |
| COD | All ages  | 39.37                                             | 100                                                                                       | 100                 | 100                 | 98.75               | 75.1                |
| COD | < 20 yr   | 39.46                                             | 100                                                                                       | 100                 | 100                 | 98.87               | 75.9                |
| COD | 20-29 yr  | 39.35                                             | 100                                                                                       | 100                 | 100                 | 98.78               | 75.27               |
| COD | 30-34 yr  | 39.23                                             | 100                                                                                       | 100                 | 100                 | 98.67               | 73.82               |
| COD | > 34 yr   | 39.51                                             | 100                                                                                       | 100                 | 100                 | 98.67               | 75.43               |
| COG | All ages  | 34.92                                             | 100                                                                                       | 100                 | 100                 | 75.32               | 60.56               |
| COG | < 20 yr   | 34.97                                             | 100                                                                                       | 100                 | 100                 | 76.12               | 60.42               |
| COG | 20-29 yr  | 34.99                                             | 100                                                                                       | 100                 | 100                 | 75.66               | 60.85               |
| COG | 30-34 yr  | 34.79                                             | 100                                                                                       | 100                 | 100                 | 74.45               | 59.96               |
| COG | > 34 yr   | 34.86                                             | 100                                                                                       | 100                 | 100                 | 74.73               | 60.59               |
| COL | All ages  | 18.78                                             | 100                                                                                       | 99.8                | 92.68               | 2.78                | 0                   |
| COL | < 20 yr   | 18.81                                             | 100                                                                                       | 99.81               | 92.41               | 2.9                 | 0                   |
| COL | 20-29 yr  | 18.77                                             | 100                                                                                       | 99.81               | 92.54               | 2.76                | 0                   |
| COL | 30-34 yr  | 18.79                                             | 100                                                                                       | 99.79               | 92.93               | 2.75                | 0                   |
| COL | > 34 yr   | 18.83                                             | 100                                                                                       | 99.75               | 93.26               | 2.74                | 0                   |
| COM | All ages  | 11.07                                             | 100                                                                                       | 99.78               | 0                   | 0                   | 0                   |
| COM | < 20 yr   | 11.07                                             | 100                                                                                       | 99.78               | 0                   | 0                   | 0                   |
| COM | 20-29 yr  | 11.07                                             | 100                                                                                       | 99.78               | 0                   | 0                   | 0                   |
| COM | 30-34 yr  | 11.07                                             | 100                                                                                       | 99.78               | 0                   | 0                   | 0                   |
| COM | > 34 yr   | 11.07                                             | 100                                                                                       | 99.78               | 0                   | 0                   | 0                   |
| CPV | All ages  | 23.38                                             | 100                                                                                       | 100                 | 100                 | 27.83               | 0.2                 |
| CPV | < 20 yr   | 23.21                                             | 100                                                                                       | 100                 | 100                 | 25.92               | 0.21                |
| CPV | 20-29 yr  | 23.45                                             | 100                                                                                       | 100                 | 100                 | 28.21               | 0.2                 |
| CPV | 30-34 yr  | 23.47                                             | 100                                                                                       | 100                 | 100                 | 28.99               | 0.2                 |
| CPV | > 34 yr   | 23.15                                             | 100                                                                                       | 100                 | 100                 | 26.21               | 0.2                 |
| CRI | All ages  | 19.73                                             | 100                                                                                       | 100                 | 96.88               | 0                   | 0                   |
| CRI | < 20 yr   | 19.63                                             | 100                                                                                       | 100                 | 96.72               | 0                   | 0                   |

| ISO | Age group | PM <sub>2.5</sub> average<br>(µg/m <sup>3</sup> ) | Percentage of pregnancies exposed to PM <sub>2.5</sub> > C <sub>0</sub> µg/m <sup>3</sup> |                     |                     |                     |                     |
|-----|-----------|---------------------------------------------------|-------------------------------------------------------------------------------------------|---------------------|---------------------|---------------------|---------------------|
|     |           |                                                   | C <sub>0</sub> = 5                                                                        | C <sub>0</sub> = 10 | C <sub>0</sub> = 15 | C <sub>0</sub> = 25 | C <sub>0</sub> = 35 |
| CRI | 20-29 yr  | 19.75                                             | 100                                                                                       | 100                 | 96.94               | 0                   | 0                   |
| CRI | 30-34 yr  | 19.77                                             | 100                                                                                       | 100                 | 96.93               | 0                   | 0                   |
| CRI | > 34 yr   | 19.74                                             | 100                                                                                       | 100                 | 96.75               | 0                   | 0                   |
| CUB | All ages  | 10.54                                             | 100                                                                                       | 52.09               | 0.21                | 0                   | 0                   |
| CUB | < 20 yr   | 10.51                                             | 100                                                                                       | 51.38               | 0.22                | 0                   | 0                   |
| CUB | 20-29 yr  | 10.54                                             | 100                                                                                       | 52.06               | 0.21                | 0                   | 0                   |
| CUB | 30-34 yr  | 10.56                                             | 100                                                                                       | 52.48               | 0.22                | 0                   | 0                   |
| CUB | > 34 yr   | 10.55                                             | 100                                                                                       | 52.69               | 0.2                 | 0                   | 0                   |
| CYP | All ages  | 18.32                                             | 100                                                                                       | 100                 | 99.83               | 0.15                | 0                   |
| CYP | < 20 yr   | 18.32                                             | 100                                                                                       | 100                 | 99.83               | 0.15                | 0                   |
| CYP | 20-29 yr  | 18.32                                             | 100                                                                                       | 100                 | 99.83               | 0.15                | 0                   |
| CYP | 30-34 yr  | 18.32                                             | 100                                                                                       | 100                 | 99.83               | 0.15                | 0                   |
| CYP | > 34 yr   | 18.32                                             | 100                                                                                       | 100                 | 99.83               | 0.15                | 0                   |
| DJI | All ages  | 42.68                                             | 100                                                                                       | 100                 | 100                 | 100                 | 94.93               |
| DJI | < 20 yr   | 42.68                                             | 100                                                                                       | 100                 | 100                 | 100                 | 94.93               |
| DJI | 20-29 yr  | 42.68                                             | 100                                                                                       | 100                 | 100                 | 100                 | 94.93               |
| DJI | 30-34 yr  | 42.68                                             | 100                                                                                       | 100                 | 100                 | 100                 | 94.93               |
| DJI | > 34 yr   | 42.68                                             | 100                                                                                       | 100                 | 100                 | 100                 | 94.93               |
| DMA | All ages  | 13.94                                             | 100                                                                                       | 100                 | 2.74                | 0                   | 0                   |
| DMA | < 20 yr   | 13.96                                             | 100                                                                                       | 100                 | 2.87                | 0                   | 0                   |
| DMA | 20-29 yr  | 13.93                                             | 100                                                                                       | 100                 | 2.67                | 0                   | 0                   |
| DMA | 30-34 yr  | 13.94                                             | 100                                                                                       | 100                 | 2.77                | 0                   | 0                   |
| DMA | > 34 yr   | 13.95                                             | 100                                                                                       | 100                 | 2.73                | 0                   | 0                   |
| DOM | All ages  | 13.27                                             | 100                                                                                       | 90.43               | 19.6                | 0                   | 0                   |
| DOM | < 20 yr   | 13.32                                             | 100                                                                                       | 90.42               | 21.04               | 0                   | 0                   |
| DOM | 20-29 yr  | 13.27                                             | 100                                                                                       | 90.43               | 19.25               | 0                   | 0                   |
| DOM | 30-34 yr  | 13.23                                             | 100                                                                                       | 90.41               | 18.86               | 0                   | 0                   |
| DOM | > 34 yr   | 13.24                                             | 100                                                                                       | 90.58               | 18.88               | 0                   | 0                   |
| DZA | All ages  | 16.59                                             | 100                                                                                       | 99.89               | 47.96               | 6.22                | 2.72                |
| DZA | < 20 yr   | 17.01                                             | 100                                                                                       | 99.88               | 51.67               | 7.33                | 3.21                |
| DZA | 20-29 yr  | 16.75                                             | 100                                                                                       | 99.89               | 49.13               | 6.7                 | 2.96                |
| DZA | 30-34 yr  | 16.46                                             | 100                                                                                       | 99.89               | 47.08               | 5.84                | 2.51                |
| DZA | > 34 yr   | 16.45                                             | 100                                                                                       | 99.89               | 46.88               | 5.81                | 2.54                |
| ECU | All ages  | 18.21                                             | 100                                                                                       | 99.85               | 78.22               | 1.91                | 0                   |
| ECU | < 20 yr   | 18.09                                             | 100                                                                                       | 99.89               | 76.86               | 1.97                | 0                   |
| ECU | 20-29 yr  | 18.19                                             | 100                                                                                       | 99.85               | 78.03               | 1.94                | 0                   |
| ECU | 30-34 yr  | 18.32                                             | 100                                                                                       | 99.84               | 79.59               | 1.84                | 0                   |
| ECU | > 34 yr   | 18.29                                             | 100                                                                                       | 99.83               | 79.3                | 1.82                | 0                   |
| EGY | All ages  | 44.42                                             | 100                                                                                       | 100                 | 100                 | 99.6                | 86.54               |
| EGY | < 20 yr   | 44.81                                             | 100                                                                                       | 100                 | 100                 | 99.62               | 87.4                |
| EGY | 20-29 yr  | 44.44                                             | 100                                                                                       | 100                 | 100                 | 99.61               | 86.66               |
| EGY | 30-34 yr  | 44.24                                             | 100                                                                                       | 100                 | 100                 | 99.58               | 86.05               |

| ISO | Age group | PM <sub>2.5</sub> average<br>(µg/m <sup>3</sup> ) | Percentage of pregnancies exposed to PM <sub>2.5</sub> > C <sub>0</sub> µg/m <sup>3</sup> |                     |                     |                     |                     |
|-----|-----------|---------------------------------------------------|-------------------------------------------------------------------------------------------|---------------------|---------------------|---------------------|---------------------|
|     |           |                                                   | C <sub>0</sub> = 5                                                                        | C <sub>0</sub> = 10 | C <sub>0</sub> = 15 | C <sub>0</sub> = 25 | C <sub>0</sub> = 35 |
| EGY | > 34 yr   | 44.29                                             | 100                                                                                       | 100                 | 100                 | 99.58               | 85.99               |
| ERI | All ages  | 34.48                                             | 100                                                                                       | 100                 | 100                 | 99.8                | 27.73               |
| ERI | < 20 yr   | 34.48                                             | 100                                                                                       | 100                 | 100                 | 99.8                | 27.73               |
| ERI | 20-29 yr  | 34.48                                             | 100                                                                                       | 100                 | 100                 | 99.8                | 27.73               |
| ERI | 30-34 yr  | 34.48                                             | 100                                                                                       | 100                 | 100                 | 99.8                | 27.73               |
| ERI | > 34 yr   | 34.48                                             | 100                                                                                       | 100                 | 100                 | 99.8                | 27.73               |
| ETH | All ages  | 24.88                                             | 100                                                                                       | 100                 | 98.94               | 38.75               | 4.64                |
| ETH | < 20 yr   | 24.85                                             | 100                                                                                       | 100                 | 98.89               | 38.61               | 4.63                |
| ETH | 20-29 yr  | 24.82                                             | 100                                                                                       | 100                 | 99.02               | 38.23               | 4.28                |
| ETH | 30-34 yr  | 24.93                                             | 100                                                                                       | 100                 | 98.86               | 39.15               | 4.96                |
| ETH | > 34 yr   | 25.05                                             | 100                                                                                       | 100                 | 98.83               | 39.97               | 5.36                |
| GAB | All ages  | 29.03                                             | 100                                                                                       | 100                 | 100                 | 82.94               | 13.7                |
| GAB | < 20 yr   | 29.08                                             | 100                                                                                       | 100                 | 100                 | 82.31               | 14.22               |
| GAB | 20-29 yr  | 29.1                                              | 100                                                                                       | 100                 | 100                 | 83.78               | 13.78               |
| GAB | 30-34 yr  | 28.93                                             | 100                                                                                       | 100                 | 100                 | 82.66               | 13.32               |
| GAB | > 34 yr   | 28.85                                             | 100                                                                                       | 100                 | 100                 | 81.21               | 13.27               |
| GEO | All ages  | 22.7                                              | 100                                                                                       | 100                 | 100                 | 38.56               | 0                   |
| GEO | < 20 yr   | 22.57                                             | 100                                                                                       | 100                 | 100                 | 36.63               | 0                   |
| GEO | 20-29 yr  | 22.78                                             | 100                                                                                       | 100                 | 100                 | 39.46               | 0                   |
| GEO | 30-34 yr  | 22.64                                             | 100                                                                                       | 100                 | 100                 | 37.87               | 0                   |
| GEO | > 34 yr   | 22.49                                             | 100                                                                                       | 100                 | 100                 | 36.13               | 0                   |
| GHA | All ages  | 32.38                                             | 100                                                                                       | 100                 | 100                 | 95.9                | 26.89               |
| GHA | < 20 yr   | 32.26                                             | 100                                                                                       | 100                 | 100                 | 95.96               | 25.94               |
| GHA | 20-29 yr  | 32.31                                             | 100                                                                                       | 100                 | 100                 | 95.9                | 26.43               |
| GHA | 30-34 yr  | 32.54                                             | 100                                                                                       | 100                 | 100                 | 95.95               | 28.04               |
| GHA | > 34 yr   | 32.45                                             | 100                                                                                       | 100                 | 100                 | 95.85               | 27.33               |
| GIN | All ages  | 31.13                                             | 100                                                                                       | 100                 | 100                 | 99.89               | 5.18                |
| GIN | < 20 yr   | 31.11                                             | 100                                                                                       | 100                 | 100                 | 99.88               | 5.17                |
| GIN | 20-29 yr  | 31.15                                             | 100                                                                                       | 100                 | 100                 | 99.89               | 5.19                |
| GIN | 30-34 yr  | 31.15                                             | 100                                                                                       | 100                 | 100                 | 99.89               | 5.23                |
| GIN | > 34 yr   | 31.06                                             | 100                                                                                       | 100                 | 100                 | 99.89               | 5.07                |
| GMB | All ages  | 43                                                | 100                                                                                       | 100                 | 100                 | 100                 | 100                 |
| GMB | < 20 yr   | 43.07                                             | 100                                                                                       | 100                 | 100                 | 100                 | 100                 |
| GMB | 20-29 yr  | 42.92                                             | 100                                                                                       | 100                 | 100                 | 100                 | 100                 |
| GMB | 30-34 yr  | 43.08                                             | 100                                                                                       | 100                 | 100                 | 100                 | 100                 |
| GMB | > 34 yr   | 43.11                                             | 100                                                                                       | 100                 | 100                 | 100                 | 100                 |
| GNB | All ages  | 34.85                                             | 100                                                                                       | 100                 | 100                 | 99.94               | 42.98               |
| GNB | < 20 yr   | 34.88                                             | 100                                                                                       | 100                 | 100                 | 99.94               | 43.18               |
| GNB | 20-29 yr  | 34.83                                             | 100                                                                                       | 100                 | 100                 | 99.94               | 42.5                |
| GNB | 30-34 yr  | 34.85                                             | 100                                                                                       | 100                 | 100                 | 99.94               | 43.11               |
| GNB | > 34 yr   | 34.87                                             | 100                                                                                       | 100                 | 100                 | 99.94               | 44.03               |
| GNQ | All ages  | 37.42                                             | 100                                                                                       | 100                 | 97.97               | 97.83               | 67.8                |

| ISO | Age group | PM <sub>2.5</sub> average<br>(µg/m <sup>3</sup> ) | Percentage of pregnancies exposed to PM <sub>2.5</sub> > C <sub>0</sub> µg/m <sup>3</sup> |                     |                     |                     |                     |
|-----|-----------|---------------------------------------------------|-------------------------------------------------------------------------------------------|---------------------|---------------------|---------------------|---------------------|
|     |           |                                                   | C <sub>0</sub> = 5                                                                        | C <sub>0</sub> = 10 | C <sub>0</sub> = 15 | C <sub>0</sub> = 25 | C <sub>0</sub> = 35 |
| GNQ | < 20 yr   | 37.23                                             | 100                                                                                       | 100                 | 97.89               | 97.74               | 67.38               |
| GNQ | 20-29 yr  | 37.73                                             | 100                                                                                       | 100                 | 98.81               | 98.67               | 68.52               |
| GNQ | 30-34 yr  | 37.03                                             | 100                                                                                       | 100                 | 97.06               | 96.9                | 66.67               |
| GNQ | > 34 yr   | 37.22                                             | 100                                                                                       | 100                 | 96.83               | 96.69               | 67.71               |
| GRD | All ages  | 15.74                                             | 100                                                                                       | 100                 | 97.79               | 0                   | 0                   |
| GRD | < 20 yr   | 15.72                                             | 100                                                                                       | 100                 | 97.88               | 0                   | 0                   |
| GRD | 20-29 yr  | 15.74                                             | 100                                                                                       | 100                 | 97.78               | 0                   | 0                   |
| GRD | 30-34 yr  | 15.74                                             | 100                                                                                       | 100                 | 97.75               | 0                   | 0                   |
| GRD | > 34 yr   | 15.74                                             | 100                                                                                       | 100                 | 97.8                | 0                   | 0                   |
| GTM | All ages  | 29.64                                             | 100                                                                                       | 100                 | 99.82               | 67.94               | 19.8                |
| GTM | < 20 yr   | 29.63                                             | 100                                                                                       | 100                 | 99.82               | 67.9                | 19.74               |
| GTM | 20-29 yr  | 29.65                                             | 100                                                                                       | 100                 | 99.82               | 67.95               | 19.81               |
| GTM | 30-34 yr  | 29.65                                             | 100                                                                                       | 100                 | 99.82               | 67.95               | 19.81               |
| GTM | > 34 yr   | 29.65                                             | 100                                                                                       | 100                 | 99.82               | 67.95               | 19.81               |
| GUY | All ages  | 20.43                                             | 100                                                                                       | 100                 | 99.99               | 0                   | 0                   |
| GUY | < 20 yr   | 20.47                                             | 100                                                                                       | 100                 | 99.99               | 0                   | 0                   |
| GUY | 20-29 yr  | 20.42                                             | 100                                                                                       | 100                 | 99.99               | 0                   | 0                   |
| GUY | 30-34 yr  | 20.42                                             | 100                                                                                       | 100                 | 99.99               | 0                   | 0                   |
| GUY | > 34 yr   | 20.43                                             | 100                                                                                       | 100                 | 99.99               | 0                   | 0                   |
| HND | All ages  | 30.19                                             | 100                                                                                       | 100                 | 99.84               | 87.64               | 16.36               |
| HND | < 20 yr   | 30.09                                             | 100                                                                                       | 100                 | 99.85               | 87.03               | 16.14               |
| HND | 20-29 yr  | 30.18                                             | 100                                                                                       | 100                 | 99.83               | 87.59               | 16.33               |
| HND | 30-34 yr  | 30.28                                             | 100                                                                                       | 100                 | 99.83               | 88.2                | 16.67               |
| HND | > 34 yr   | 30.25                                             | 100                                                                                       | 100                 | 99.84               | 88.13               | 16.43               |
| HTI | All ages  | 14.88                                             | 100                                                                                       | 99.81               | 47.68               | 0                   | 0                   |
| HTI | < 20 yr   | 14.9                                              | 100                                                                                       | 99.8                | 47.57               | 0                   | 0                   |
| HTI | 20-29 yr  | 14.88                                             | 100                                                                                       | 99.81               | 48.31               | 0                   | 0                   |
| HTI | 30-34 yr  | 14.86                                             | 100                                                                                       | 99.82               | 47.44               | 0                   | 0                   |
| HTI | > 34 yr   | 14.86                                             | 100                                                                                       | 99.82               | 46.44               | 0                   | 0                   |
| IDN | All ages  | 26.19                                             | 100                                                                                       | 99.28               | 85.96               | 45.39               | 18.43               |
| IDN | < 20 yr   | 26.04                                             | 100                                                                                       | 99.27               | 85.35               | 44.56               | 18.17               |
| IDN | 20-29 yr  | 26.36                                             | 100                                                                                       | 99.3                | 86.09               | 46.17               | 19.02               |
| IDN | 30-34 yr  | 26.1                                              | 100                                                                                       | 99.28               | 86                  | 45                  | 18.08               |
| IDN | > 34 yr   | 25.8                                              | 100                                                                                       | 99.23               | 85.72               | 43.66               | 17.06               |
| IND | All ages  | 60.15                                             | 100                                                                                       | 99.96               | 99.64               | 94                  | 79.2                |
| IND | < 20 yr   | 62.39                                             | 100                                                                                       | 99.97               | 99.7                | 94.96               | 81.75               |
| IND | 20-29 yr  | 60.03                                             | 99.99                                                                                     | 99.96               | 99.64               | 94.06               | 79.12               |
| IND | 30-34 yr  | 60.35                                             | 99.99                                                                                     | 99.96               | 99.62               | 93.84               | 79.38               |
| IND | > 34 yr   | 59.45                                             | 100                                                                                       | 99.96               | 99.58               | 93.14               | 77.91               |
| IRN | All ages  | 40.53                                             | 100                                                                                       | 100                 | 100                 | 98.63               | 60.39               |
| IRN | < 20 yr   | 41.29                                             | 100                                                                                       | 100                 | 100                 | 98.61               | 62.97               |
| IRN | 20-29 yr  | 40.7                                              | 100                                                                                       | 100                 | 100                 | 98.67               | 61.09               |

| ISO | Age group | PM <sub>2.5</sub> average<br>(µg/m <sup>3</sup> ) | Percentage of pregnancies exposed to PM <sub>2.5</sub> > C <sub>0</sub> µg/m <sup>3</sup> |                     |                     |                     |                     |
|-----|-----------|---------------------------------------------------|-------------------------------------------------------------------------------------------|---------------------|---------------------|---------------------|---------------------|
|     |           |                                                   | C <sub>0</sub> = 5                                                                        | C <sub>0</sub> = 10 | C <sub>0</sub> = 15 | C <sub>0</sub> = 25 | C <sub>0</sub> = 35 |
| IRN | 30-34 yr  | 40.3                                              | 100                                                                                       | 100                 | 100                 | 98.63               | 59.26               |
| IRN | > 34 yr   | 39.99                                             | 100                                                                                       | 100                 | 100                 | 98.5                | 58.41               |
| IRQ | All ages  | 51.92                                             | 100                                                                                       | 100                 | 100                 | 100                 | 96.94               |
| IRQ | < 20 yr   | 52.28                                             | 100                                                                                       | 100                 | 100                 | 100                 | 97.21               |
| IRQ | 20-29 yr  | 51.7                                              | 100                                                                                       | 100                 | 100                 | 100                 | 96.8                |
| IRQ | 30-34 yr  | 52.25                                             | 100                                                                                       | 100                 | 100                 | 100                 | 97.04               |
| IRQ | > 34 yr   | 51.95                                             | 100                                                                                       | 100                 | 100                 | 100                 | 97.09               |
| ISR | All ages  | 22.66                                             | 100                                                                                       | 100                 | 100                 | 9.92                | 0.02                |
| ISR | < 20 yr   | 22.6                                              | 100                                                                                       | 100                 | 100                 | 10.57               | 0.02                |
| ISR | 20-29 yr  | 22.67                                             | 100                                                                                       | 100                 | 100                 | 10.11               | 0.02                |
| ISR | 30-34 yr  | 22.67                                             | 100                                                                                       | 100                 | 100                 | 9.64                | 0.02                |
| ISR | > 34 yr   | 22.65                                             | 100                                                                                       | 100                 | 100                 | 9.82                | 0.02                |
| JAM | All ages  | 21.18                                             | 100                                                                                       | 100                 | 91.78               | 29.74               | 0                   |
| JAM | < 20 yr   | 20.99                                             | 100                                                                                       | 100                 | 91.29               | 28.04               | 0                   |
| JAM | 20-29 yr  | 21.22                                             | 100                                                                                       | 100                 | 92.03               | 30.11               | 0                   |
| JAM | 30-34 yr  | 21.12                                             | 100                                                                                       | 100                 | 91.48               | 29.01               | 0                   |
| JAM | > 34 yr   | 21.32                                             | 100                                                                                       | 100                 | 91.75               | 30.99               | 0                   |
| JOR | All ages  | 34.17                                             | 100                                                                                       | 100                 | 100                 | 91.1                | 39.37               |
| JOR | < 20 yr   | 33.9                                              | 100                                                                                       | 100                 | 100                 | 90.57               | 37.85               |
| JOR | 20-29 yr  | 34.15                                             | 100                                                                                       | 100                 | 100                 | 91.05               | 39.25               |
| JOR | 30-34 yr  | 34.2                                              | 100                                                                                       | 100                 | 100                 | 91.16               | 39.42               |
| JOR | > 34 yr   | 34.31                                             | 100                                                                                       | 100                 | 100                 | 91.36               | 40.18               |
| JPN | All ages  | 13.12                                             | 100                                                                                       | 90.75               | 21.79               | 0                   | 0                   |
| JPN | < 20 yr   | 13.03                                             | 100                                                                                       | 90.11               | 20.56               | 0                   | 0                   |
| JPN | 20-29 yr  | 13.15                                             | 100                                                                                       | 90.85               | 22.34               | 0                   | 0                   |
| JPN | 30-34 yr  | 13.12                                             | 100                                                                                       | 90.71               | 21.76               | 0                   | 0                   |
| JPN | > 34 yr   | 13.1                                              | 100                                                                                       | 90.71               | 21.2                | 0                   | 0                   |
| KAZ | All ages  | 22.98                                             | 100                                                                                       | 99.81               | 68.95               | 47.78               | 9.02                |
| KAZ | < 20 yr   | 22.49                                             | 100                                                                                       | 99.8                | 66.9                | 45.21               | 8.39                |
| KAZ | 20-29 yr  | 22.93                                             | 100                                                                                       | 99.81               | 68.9                | 47.62               | 8.82                |
| KAZ | 30-34 yr  | 23.12                                             | 100                                                                                       | 99.81               | 69.43               | 48.46               | 9.34                |
| KAZ | > 34 yr   | 23.16                                             | 100                                                                                       | 99.81               | 69.14               | 48.42               | 9.79                |
| KEN | All ages  | 20.92                                             | 100                                                                                       | 99.92               | 90.1                | 22.01               | 0                   |
| KEN | < 20 yr   | 21.14                                             | 100                                                                                       | 99.92               | 90.92               | 24.73               | 0                   |
| KEN | 20-29 yr  | 20.95                                             | 100                                                                                       | 99.92               | 89.8                | 22.21               | 0                   |
| KEN | 30-34 yr  | 20.74                                             | 100                                                                                       | 99.91               | 89.94               | 20.51               | 0                   |
| KEN | > 34 yr   | 20.8                                              | 100                                                                                       | 99.91               | 90.96               | 20.67               | 0                   |
| KGZ | All ages  | 23.9                                              | 100                                                                                       | 100                 | 96.31               | 35.58               | 0.22                |
| KGZ | < 20 yr   | 23.95                                             | 100                                                                                       | 100                 | 96.32               | 36.57               | 0.21                |
| KGZ | 20-29 yr  | 23.94                                             | 100                                                                                       | 100                 | 96.35               | 35.91               | 0.2                 |
| KGZ | 30-34 yr  | 23.8                                              | 100                                                                                       | 100                 | 96.14               | 34.46               | 0.26                |
| KGZ | > 34 yr   | 23.83                                             | 100                                                                                       | 100                 | 96.28               | 34.68               | 0.25                |

| ISO | Age group | PM <sub>2.5</sub> average<br>(µg/m <sup>3</sup> ) | Percentage of pregnancies exposed to PM <sub>2.5</sub> > C <sub>0</sub> µg/m <sup>3</sup> |                     |                     |                     |                     |
|-----|-----------|---------------------------------------------------|-------------------------------------------------------------------------------------------|---------------------|---------------------|---------------------|---------------------|
|     |           |                                                   | C <sub>0</sub> = 5                                                                        | C <sub>0</sub> = 10 | C <sub>0</sub> = 15 | C <sub>0</sub> = 25 | C <sub>0</sub> = 35 |
| KHM | All ages  | 17.58                                             | 100                                                                                       | 100                 | 95.45               | 0                   | 0                   |
| KHM | < 20 yr   | 17.6                                              | 100                                                                                       | 100                 | 95.45               | 0                   | 0                   |
| KHM | 20-29 yr  | 17.6                                              | 100                                                                                       | 100                 | 95.64               | 0                   | 0                   |
| KHM | 30-34 yr  | 17.53                                             | 100                                                                                       | 100                 | 95.04               | 0                   | 0                   |
| KHM | > 34 yr   | 17.55                                             | 100                                                                                       | 100                 | 95.08               | 0                   | 0                   |
| KNA | All ages  | 12.82                                             | 100                                                                                       | 100                 | 0.76                | 0                   | 0                   |
| KNA | < 20 yr   | 12.81                                             | 100                                                                                       | 100                 | 0.82                | 0                   | 0                   |
| KNA | 20-29 yr  | 12.84                                             | 100                                                                                       | 100                 | 0.75                | 0                   | 0                   |
| KNA | 30-34 yr  | 12.81                                             | 100                                                                                       | 100                 | 0.74                | 0                   | 0                   |
| KNA | > 34 yr   | 12.81                                             | 100                                                                                       | 100                 | 0.73                | 0                   | 0                   |
| KOR | All ages  | 24.73                                             | 100                                                                                       | 100                 | 100                 | 40.41               | 0                   |
| KOR | < 20 yr   | 24.58                                             | 100                                                                                       | 100                 | 100                 | 38.21               | 0                   |
| KOR | 20-29 yr  | 24.74                                             | 100                                                                                       | 100                 | 100                 | 40.47               | 0                   |
| KOR | 30-34 yr  | 24.73                                             | 100                                                                                       | 100                 | 100                 | 40.53               | 0                   |
| KOR | > 34 yr   | 24.68                                             | 100                                                                                       | 100                 | 100                 | 39.9                | 0                   |
| KWT | All ages  | 64.84                                             | 100                                                                                       | 100                 | 100                 | 100                 | 100                 |
| KWT | < 20 yr   | 64.12                                             | 100                                                                                       | 100                 | 100                 | 100                 | 100                 |
| KWT | 20-29 yr  | 64.66                                             | 100                                                                                       | 100                 | 100                 | 100                 | 100                 |
| KWT | 30-34 yr  | 64.92                                             | 100                                                                                       | 100                 | 100                 | 100                 | 100                 |
| KWT | > 34 yr   | 65.07                                             | 100                                                                                       | 100                 | 100                 | 100                 | 100                 |
| LAO | All ages  | 26.71                                             | 100                                                                                       | 100                 | 100                 | 61.74               | 3.2                 |
| LAO | < 20 yr   | 26.79                                             | 100                                                                                       | 100                 | 100                 | 62.47               | 3.36                |
| LAO | 20-29 yr  | 26.73                                             | 100                                                                                       | 100                 | 100                 | 61.91               | 3.21                |
| LAO | 30-34 yr  | 26.63                                             | 100                                                                                       | 100                 | 100                 | 61.07               | 3.1                 |
| LAO | > 34 yr   | 26.61                                             | 100                                                                                       | 100                 | 100                 | 60.68               | 3.1                 |
| LBN | All ages  | 30.99                                             | 100                                                                                       | 100                 | 100                 | 88.45               | 23.62               |
| LBN | < 20 yr   | 30.99                                             | 100                                                                                       | 100                 | 100                 | 88.45               | 23.62               |
| LBN | 20-29 yr  | 30.99                                             | 100                                                                                       | 100                 | 100                 | 88.45               | 23.63               |
| LBN | 30-34 yr  | 30.99                                             | 100                                                                                       | 100                 | 100                 | 88.45               | 23.62               |
| LBN | > 34 yr   | 30.99                                             | 100                                                                                       | 100                 | 100                 | 88.45               | 23.62               |
| LBR | All ages  | 25.8                                              | 100                                                                                       | 100                 | 100                 | 63.34               | 0                   |
| LBR | < 20 yr   | 25.76                                             | 100                                                                                       | 100                 | 100                 | 62.33               | 0                   |
| LBR | 20-29 yr  | 25.79                                             | 100                                                                                       | 100                 | 100                 | 63.28               | 0                   |
| LBR | 30-34 yr  | 25.81                                             | 100                                                                                       | 100                 | 100                 | 63.6                | 0                   |
| LBR | > 34 yr   | 25.84                                             | 100                                                                                       | 100                 | 100                 | 64.3                | 0                   |
| LBY | All ages  | 21.54                                             | 100                                                                                       | 100                 | 98.49               | 16.64               | 5.86                |
| LBY | < 20 yr   | 21.54                                             | 100                                                                                       | 100                 | 98.49               | 16.64               | 5.86                |
| LBY | 20-29 yr  | 21.54                                             | 100                                                                                       | 100                 | 98.49               | 16.64               | 5.86                |
| LBY | 30-34 yr  | 21.54                                             | 100                                                                                       | 100                 | 98.49               | 16.64               | 5.86                |
| LBY | > 34 yr   | 21.54                                             | 100                                                                                       | 100                 | 98.49               | 16.64               | 5.86                |
| LCA | All ages  | 15.03                                             | 100                                                                                       | 100                 | 50.57               | 0                   | 0                   |
| LCA | < 20 yr   | 15.03                                             | 100                                                                                       | 100                 | 50.57               | 0                   | 0                   |

| ISO | Age group | PM <sub>2.5</sub> average<br>(µg/m <sup>3</sup> ) | Percentage of pregnancies exposed to PM <sub>2.5</sub> > C <sub>0</sub> µg/m <sup>3</sup> |                     |                     |                     |                     |
|-----|-----------|---------------------------------------------------|-------------------------------------------------------------------------------------------|---------------------|---------------------|---------------------|---------------------|
|     |           |                                                   | C <sub>0</sub> = 5                                                                        | C <sub>0</sub> = 10 | C <sub>0</sub> = 15 | C <sub>0</sub> = 25 | C <sub>0</sub> = 35 |
| LCA | 20-29 yr  | 15.03                                             | 100                                                                                       | 100                 | 50.57               | 0                   | 0                   |
| LCA | 30-34 yr  | 15.03                                             | 100                                                                                       | 100                 | 50.57               | 0                   | 0                   |
| LCA | > 34 yr   | 15.03                                             | 100                                                                                       | 100                 | 50.57               | 0                   | 0                   |
| LKA | All ages  | 25.3                                              | 100                                                                                       | 100                 | 99.99               | 44.49               | 0                   |
| LKA | < 20 yr   | 25.23                                             | 100                                                                                       | 100                 | 99.98               | 43.75               | 0                   |
| LKA | 20-29 yr  | 25.26                                             | 100                                                                                       | 100                 | 99.99               | 43.77               | 0                   |
| LKA | 30-34 yr  | 25.35                                             | 100                                                                                       | 100                 | 99.99               | 45.3                | 0                   |
| LKA | > 34 yr   | 25.34                                             | 100                                                                                       | 100                 | 99.99               | 45.28               | 0                   |
| LSO | All ages  | 26.77                                             | 100                                                                                       | 100                 | 100                 | 68.24               | 0.01                |
| LSO | < 20 yr   | 26.62                                             | 100                                                                                       | 100                 | 100                 | 66.14               | 0.01                |
| LSO | 20-29 yr  | 26.8                                              | 100                                                                                       | 100                 | 100                 | 68.68               | 0.01                |
| LSO | 30-34 yr  | 26.79                                             | 100                                                                                       | 100                 | 100                 | 68.52               | 0.01                |
| LSO | > 34 yr   | 26.77                                             | 100                                                                                       | 100                 | 100                 | 68.1                | 0.01                |
| MAR | All ages  | 20.78                                             | 100                                                                                       | 99.99               | 92.71               | 11.33               | 0.01                |
| MAR | < 20 yr   | 20.62                                             | 100                                                                                       | 99.99               | 92.06               | 10.78               | 0.01                |
| MAR | 20-29 yr  | 20.73                                             | 100                                                                                       | 99.99               | 92.68               | 11.18               | 0.01                |
| MAR | 30-34 yr  | 20.84                                             | 100                                                                                       | 99.99               | 92.95               | 11.62               | 0.01                |
| MAR | > 34 yr   | 20.85                                             | 100                                                                                       | 99.99               | 92.74               | 11.51               | 0.01                |
| MDG | All ages  | 15.06                                             | 99.99                                                                                     | 84.32               | 49.15               | 0.01                | 0                   |
| MDG | < 20 yr   | 14.95                                             | 99.99                                                                                     | 83.8                | 48.48               | 0.01                | 0                   |
| MDG | 20-29 yr  | 15.02                                             | 99.99                                                                                     | 84.21               | 48.77               | 0.01                | 0                   |
| MDG | 30-34 yr  | 15.15                                             | 100                                                                                       | 84.34               | 49.65               | 0.01                | 0                   |
| MDG | > 34 yr   | 15.26                                             | 100                                                                                       | 85.48               | 51.07               | 0.01                | 0                   |
| MDV | All ages  | 20.05                                             | 100                                                                                       | 96.34               | 69.23               | 17.41               | 0                   |
| MDV | < 20 yr   | 20.05                                             | 100                                                                                       | 96.34               | 69.23               | 17.41               | 0                   |
| MDV | 20-29 yr  | 20.05                                             | 100                                                                                       | 96.34               | 69.23               | 17.41               | 0                   |
| MDV | 30-34 yr  | 20.05                                             | 100                                                                                       | 96.34               | 69.23               | 17.41               | 0                   |
| MDV | > 34 yr   | 20.05                                             | 100                                                                                       | 96.34               | 69.23               | 17.41               | 0                   |
| MEX | All ages  | 19.22                                             | 99.79                                                                                     | 90.56               | 73.78               | 17.43               | 0                   |
| MEX | < 20 yr   | 19.03                                             | 99.78                                                                                     | 90.25               | 72.97               | 16.42               | 0                   |
| MEX | 20-29 yr  | 19.22                                             | 99.8                                                                                      | 90.66               | 73.87               | 17.38               | 0                   |
| MEX | 30-34 yr  | 19.29                                             | 99.78                                                                                     | 90.64               | 74.07               | 17.89               | 0                   |
| MEX | > 34 yr   | 19.3                                              | 99.78                                                                                     | 90.34               | 73.96               | 18.25               | 0                   |
| MLI | All ages  | 40.22                                             | 100                                                                                       | 100                 | 100                 | 100                 | 70.38               |
| MLI | < 20 yr   | 39.96                                             | 100                                                                                       | 100                 | 100                 | 100                 | 68.3                |
| MLI | 20-29 yr  | 40.18                                             | 100                                                                                       | 100                 | 100                 | 100                 | 69.99               |
| MLI | 30-34 yr  | 40.37                                             | 100                                                                                       | 100                 | 100                 | 100                 | 71.76               |
| MLI | > 34 yr   | 40.5                                              | 100                                                                                       | 100                 | 100                 | 100                 | 72.65               |
| MMR | All ages  | 35                                                | 100                                                                                       | 100                 | 99.84               | 94.85               | 43.25               |
| MMR | < 20 yr   | 34.82                                             | 100                                                                                       | 100                 | 99.83               | 94.37               | 41.71               |
| MMR | 20-29 yr  | 34.99                                             | 100                                                                                       | 100                 | 99.84               | 94.82               | 43.05               |
| MMR | 30-34 yr  | 35.05                                             | 100                                                                                       | 100                 | 99.85               | 94.93               | 43.8                |

| ISO | Age group | PM <sub>2.5</sub> average<br>(µg/m <sup>3</sup> ) | Percentage of pregnancies exposed to PM <sub>2.5</sub> > C <sub>0</sub> µg/m <sup>3</sup> |                     |                     |                     |                     |
|-----|-----------|---------------------------------------------------|-------------------------------------------------------------------------------------------|---------------------|---------------------|---------------------|---------------------|
|     |           |                                                   | C <sub>0</sub> = 5                                                                        | C <sub>0</sub> = 10 | C <sub>0</sub> = 15 | C <sub>0</sub> = 25 | C <sub>0</sub> = 35 |
| MMR | > 34 yr   | 35.06                                             | 100                                                                                       | 100                 | 99.85               | 95.07               | 44.03               |
| MNG | All ages  | 40.69                                             | 100                                                                                       | 99.97               | 89.11               | 54.34               | 48.04               |
| MNG | < 20 yr   | 40.97                                             | 100                                                                                       | 99.97               | 89.18               | 55.01               | 48.67               |
| MNG | 20-29 yr  | 41.02                                             | 100                                                                                       | 99.97               | 88.91               | 54.99               | 48.83               |
| MNG | 30-34 yr  | 39.79                                             | 100                                                                                       | 99.96               | 89.2                | 52.46               | 45.98               |
| MNG | > 34 yr   | 40.38                                             | 100                                                                                       | 99.97               | 89.85               | 53.81               | 47.16               |
| MOZ | All ages  | 18.98                                             | 100                                                                                       | 99.67               | 79.07               | 3.76                | 0                   |
| MOZ | < 20 yr   | 18.98                                             | 100                                                                                       | 99.67               | 78.96               | 3.88                | 0                   |
| MOZ | 20-29 yr  | 19.03                                             | 100                                                                                       | 99.68               | 79.09               | 3.83                | 0                   |
| MOZ | 30-34 yr  | 18.92                                             | 100                                                                                       | 99.68               | 79.42               | 3.51                | 0                   |
| MOZ | > 34 yr   | 18.88                                             | 100                                                                                       | 99.64               | 78.81               | 3.58                | 0                   |
| MRT | All ages  | 52.46                                             | 100                                                                                       | 100                 | 100                 | 100                 | 100                 |
| MRT | < 20 yr   | 52.61                                             | 100                                                                                       | 100                 | 100                 | 100                 | 100                 |
| MRT | 20-29 yr  | 52.4                                              | 100                                                                                       | 100                 | 100                 | 100                 | 100                 |
| MRT | 30-34 yr  | 52.41                                             | 100                                                                                       | 100                 | 100                 | 100                 | 100                 |
| MRT | > 34 yr   | 52.55                                             | 100                                                                                       | 100                 | 100                 | 100                 | 100                 |
| MUS | All ages  | 14.74                                             | 100                                                                                       | 96.63               | 55.61               | 0                   | 0                   |
| MUS | < 20 yr   | 14.73                                             | 100                                                                                       | 96.4                | 55.66               | 0                   | 0                   |
| MUS | 20-29 yr  | 14.74                                             | 100                                                                                       | 96.58               | 55.82               | 0                   | 0                   |
| MUS | 30-34 yr  | 14.74                                             | 100                                                                                       | 96.67               | 55.13               | 0                   | 0                   |
| MUS | > 34 yr   | 14.76                                             | 100                                                                                       | 96.9                | 55.56               | 0                   | 0                   |
| MWI | All ages  | 21.93                                             | 100                                                                                       | 100                 | 100                 | 6.25                | 0                   |
| MWI | < 20 yr   | 21.91                                             | 100                                                                                       | 100                 | 100                 | 6.6                 | 0                   |
| MWI | 20-29 yr  | 21.93                                             | 100                                                                                       | 100                 | 100                 | 6.01                | 0                   |
| MWI | 30-34 yr  | 21.94                                             | 100                                                                                       | 100                 | 100                 | 6.21                | 0                   |
| MWI | > 34 yr   | 21.95                                             | 100                                                                                       | 100                 | 100                 | 6.79                | 0                   |
| MYS | All ages  | 24.16                                             | 100                                                                                       | 100                 | 95.11               | 44.35               | 0                   |
| MYS | < 20 yr   | 23.66                                             | 100                                                                                       | 100                 | 95.19               | 38.43               | 0                   |
| MYS | 20-29 yr  | 24.25                                             | 100                                                                                       | 100                 | 94.94               | 45.78               | 0                   |
| MYS | 30-34 yr  | 24.09                                             | 100                                                                                       | 100                 | 95.16               | 43.36               | 0                   |
| MYS | > 34 yr   | 24.15                                             | 100                                                                                       | 100                 | 95.45               | 43.38               | 0                   |
| NAM | All ages  | 17.88                                             | 100                                                                                       | 98.08               | 68.64               | 7.46                | 0                   |
| NAM | < 20 yr   | 18.45                                             | 100                                                                                       | 98.38               | 75.12               | 7.6                 | 0                   |
| NAM | 20-29 yr  | 17.89                                             | 100                                                                                       | 98.11               | 68.62               | 7.59                | 0                   |
| NAM | 30-34 yr  | 17.57                                             | 100                                                                                       | 97.91               | 65.62               | 7.1                 | 0                   |
| NAM | > 34 yr   | 17.68                                             | 100                                                                                       | 97.9                | 66.63               | 7.27                | 0                   |
| NER | All ages  | 77.32                                             | 100                                                                                       | 100                 | 100                 | 100                 | 100                 |
| NER | < 20 yr   | 78.28                                             | 100                                                                                       | 100                 | 100                 | 100                 | 100                 |
| NER | 20-29 yr  | 76.98                                             | 100                                                                                       | 100                 | 100                 | 100                 | 100                 |
| NER | 30-34 yr  | 77.07                                             | 100                                                                                       | 100                 | 100                 | 100                 | 100                 |
| NER | > 34 yr   | 77.4                                              | 100                                                                                       | 100                 | 100                 | 100                 | 100                 |
| NGA | All ages  | 69.66                                             | 100                                                                                       | 100                 | 100                 | 98.9                | 90.59               |



| ISO | Age group | PM <sub>2.5</sub> average<br>(µg/m <sup>3</sup> ) | Percentage of pregnancies exposed to PM <sub>2.5</sub> > C <sub>0</sub> µg/m <sup>3</sup> |                     |                     |                     |                     |
|-----|-----------|---------------------------------------------------|-------------------------------------------------------------------------------------------|---------------------|---------------------|---------------------|---------------------|
|     |           |                                                   | C <sub>0</sub> = 5                                                                        | C <sub>0</sub> = 10 | C <sub>0</sub> = 15 | C <sub>0</sub> = 25 | C <sub>0</sub> = 35 |
| NGA | < 20 yr   | 70.01                                             | 100                                                                                       | 100                 | 100                 | 98.85               | 90.4                |
| NGA | 20-29 yr  | 70.3                                              | 100                                                                                       | 100                 | 100                 | 98.9                | 90.81               |
| NGA | 30-34 yr  | 70.13                                             | 100                                                                                       | 100                 | 100                 | 99                  | 90.88               |
| NGA | > 34 yr   | 66.96                                             | 100                                                                                       | 100                 | 100                 | 98.84               | 89.78               |
| NIC | All ages  | 20.95                                             | 100                                                                                       | 100                 | 98.41               | 21.1                | 0                   |
| NIC | < 20 yr   | 20.93                                             | 100                                                                                       | 100                 | 98.37               | 20.74               | 0                   |
| NIC | 20-29 yr  | 20.98                                             | 100                                                                                       | 100                 | 98.4                | 21.45               | 0                   |
| NIC | 30-34 yr  | 20.95                                             | 100                                                                                       | 100                 | 98.45               | 20.96               | 0                   |
| NIC | > 34 yr   | 20.87                                             | 100                                                                                       | 100                 | 98.49               | 20.25               | 0                   |
| NPL | All ages  | 50.49                                             | 100                                                                                       | 100                 | 99.97               | 97.96               | 77.62               |
| NPL | < 20 yr   | 50.54                                             | 100                                                                                       | 100                 | 99.97               | 97.98               | 77.79               |
| NPL | 20-29 yr  | 50.39                                             | 100                                                                                       | 100                 | 99.97               | 97.95               | 77.48               |
| NPL | 30-34 yr  | 50.83                                             | 100                                                                                       | 100                 | 99.98               | 98.01               | 77.99               |
| NPL | > 34 yr   | 50.76                                             | 100                                                                                       | 100                 | 99.97               | 97.94               | 77.86               |
| OMN | All ages  | 47.5                                              | 100                                                                                       | 100                 | 100                 | 100                 | 97.1                |
| OMN | < 20 yr   | 47.46                                             | 100                                                                                       | 100                 | 100                 | 100                 | 96.89               |
| OMN | 20-29 yr  | 47.48                                             | 100                                                                                       | 100                 | 100                 | 100                 | 97.02               |
| OMN | 30-34 yr  | 47.51                                             | 100                                                                                       | 100                 | 100                 | 100                 | 97.15               |
| OMN | > 34 yr   | 47.52                                             | 100                                                                                       | 100                 | 100                 | 100                 | 97.26               |
| PAK | All ages  | 63.16                                             | 99.99                                                                                     | 99.81               | 99.37               | 98.13               | 93.92               |
| PAK | < 20 yr   | 63.07                                             | 99.99                                                                                     | 99.81               | 99.36               | 98.17               | 94.06               |
| PAK | 20-29 yr  | 63.28                                             | 99.99                                                                                     | 99.81               | 99.38               | 98.12               | 93.87               |
| PAK | 30-34 yr  | 62.97                                             | 99.99                                                                                     | 99.81               | 99.37               | 98.13               | 93.97               |
| PAK | > 34 yr   | 62.87                                             | 99.99                                                                                     | 99.81               | 99.36               | 98.11               | 94.01               |
| PAN | All ages  | 17.23                                             | 100                                                                                       | 100                 | 89.17               | 0                   | 0                   |
| PAN | < 20 yr   | 17.18                                             | 100                                                                                       | 100                 | 88.61               | 0                   | 0                   |
| PAN | 20-29 yr  | 17.26                                             | 100                                                                                       | 100                 | 89.57               | 0                   | 0                   |
| PAN | 30-34 yr  | 17.22                                             | 100                                                                                       | 100                 | 88.65               | 0                   | 0                   |
| PAN | > 34 yr   | 17.25                                             | 100                                                                                       | 100                 | 89.02               | 0                   | 0                   |
| PER | All ages  | 26.59                                             | 99.95                                                                                     | 98.42               | 92.64               | 60.43               | 17.69               |
| PER | < 20 yr   | 26.42                                             | 99.96                                                                                     | 98.49               | 92.86               | 59.58               | 16.61               |
| PER | 20-29 yr  | 26.63                                             | 99.95                                                                                     | 98.41               | 92.64               | 60.66               | 17.89               |
| PER | 30-34 yr  | 26.64                                             | 99.95                                                                                     | 98.4                | 92.56               | 60.68               | 17.99               |
| PER | > 34 yr   | 26.55                                             | 99.95                                                                                     | 98.41               | 92.54               | 60.09               | 17.56               |
| PHL | All ages  | 22.52                                             | 100                                                                                       | 99.84               | 92.46               | 29.09               | 0                   |
| PHL | < 20 yr   | 22.35                                             | 100                                                                                       | 99.84               | 92.02               | 27.37               | 0                   |
| PHL | 20-29 yr  | 22.57                                             | 100                                                                                       | 99.84               | 92.63               | 29.58               | 0                   |
| PHL | 30-34 yr  | 22.51                                             | 100                                                                                       | 99.85               | 92.4                | 29.19               | 0                   |
| PHL | > 34 yr   | 22.44                                             | 100                                                                                       | 99.84               | 92.18               | 28.49               | 0                   |
| PNG | All ages  | 15.53                                             | 100                                                                                       | 99.69               | 60.36               | 0.06                | 0                   |
| PNG | < 20 yr   | 15.53                                             | 100                                                                                       | 99.69               | 60.47               | 0.05                | 0                   |
| PNG | 20-29 yr  | 15.53                                             | 100                                                                                       | 99.69               | 60.39               | 0.06                | 0                   |

| ISO | Age group | PM <sub>2.5</sub> average<br>(µg/m <sup>3</sup> ) | Percentage of pregnancies exposed to PM <sub>2.5</sub> > C <sub>0</sub> µg/m <sup>3</sup> |                     |                     |                     |                     |
|-----|-----------|---------------------------------------------------|-------------------------------------------------------------------------------------------|---------------------|---------------------|---------------------|---------------------|
|     |           |                                                   | C <sub>0</sub> = 5                                                                        | C <sub>0</sub> = 10 | C <sub>0</sub> = 15 | C <sub>0</sub> = 25 | C <sub>0</sub> = 35 |
| PNG | 30-34 yr  | 15.52                                             | 100                                                                                       | 99.69               | 60.3                | 0.06                | 0                   |
| PNG | > 34 yr   | 15.52                                             | 100                                                                                       | 99.69               | 60.31               | 0.06                | 0                   |
| PRK | All ages  | 29.26                                             | 100                                                                                       | 100                 | 100                 | 63                  | 25.06               |
| PRK | < 20 yr   | 29.09                                             | 100                                                                                       | 100                 | 100                 | 62                  | 24.21               |
| PRK | 20-29 yr  | 29.25                                             | 100                                                                                       | 100                 | 100                 | 62.99               | 24.97               |
| PRK | 30-34 yr  | 29.26                                             | 100                                                                                       | 100                 | 100                 | 63                  | 25.15               |
| PRK | > 34 yr   | 29.26                                             | 100                                                                                       | 100                 | 100                 | 63.05               | 25.01               |
| PRY | All ages  | 15.08                                             | 100                                                                                       | 100                 | 46.72               | 0                   | 0                   |
| PRY | < 20 yr   | 15.07                                             | 100                                                                                       | 100                 | 46.68               | 0                   | 0                   |
| PRY | 20-29 yr  | 15.09                                             | 100                                                                                       | 100                 | 47.07               | 0                   | 0                   |
| PRY | 30-34 yr  | 15.07                                             | 100                                                                                       | 100                 | 46.17               | 0                   | 0                   |
| PRY | > 34 yr   | 15.07                                             | 100                                                                                       | 100                 | 46.22               | 0                   | 0                   |
| PSE | All ages  | 23.91                                             | 100                                                                                       | 100                 | 100                 | 23.93               | 0                   |
| PSE | < 20 yr   | 23.84                                             | 100                                                                                       | 100                 | 100                 | 23.19               | 0                   |
| PSE | 20-29 yr  | 23.9                                              | 100                                                                                       | 100                 | 100                 | 23.98               | 0                   |
| PSE | 30-34 yr  | 23.95                                             | 100                                                                                       | 100                 | 100                 | 24.38               | 0                   |
| PSE | > 34 yr   | 23.97                                             | 100                                                                                       | 100                 | 100                 | 24.43               | 0                   |
| QAT | All ages  | 85.98                                             | 100                                                                                       | 100                 | 100                 | 100                 | 100                 |
| QAT | < 20 yr   | 85.98                                             | 100                                                                                       | 100                 | 100                 | 100                 | 100                 |
| QAT | 20-29 yr  | 85.98                                             | 100                                                                                       | 100                 | 100                 | 100                 | 100                 |
| QAT | 30-34 yr  | 85.98                                             | 100                                                                                       | 100                 | 100                 | 100                 | 100                 |
| QAT | > 34 yr   | 85.98                                             | 100                                                                                       | 100                 | 100                 | 100                 | 100                 |
| RWA | All ages  | 38.59                                             | 100                                                                                       | 100                 | 100                 | 100                 | 96.25               |
| RWA | < 20 yr   | 38.66                                             | 100                                                                                       | 100                 | 100                 | 100                 | 96.3                |
| RWA | 20-29 yr  | 38.62                                             | 100                                                                                       | 100                 | 100                 | 100                 | 96.28               |
| RWA | 30-34 yr  | 38.55                                             | 100                                                                                       | 100                 | 100                 | 100                 | 96.19               |
| RWA | > 34 yr   | 38.57                                             | 100                                                                                       | 100                 | 100                 | 100                 | 96.22               |
| SAU | All ages  | 73.75                                             | 100                                                                                       | 100                 | 100                 | 99.91               | 98.56               |
| SAU | < 20 yr   | 73.1                                              | 100                                                                                       | 100                 | 100                 | 99.9                | 98.53               |
| SAU | 20-29 yr  | 73.61                                             | 100                                                                                       | 100                 | 100                 | 99.9                | 98.47               |
| SAU | 30-34 yr  | 73.88                                             | 100                                                                                       | 100                 | 100                 | 99.91               | 98.56               |
| SAU | > 34 yr   | 73.86                                             | 100                                                                                       | 100                 | 100                 | 99.91               | 98.68               |
| SDN | All ages  | 38.25                                             | 100                                                                                       | 100                 | 100                 | 98.35               | 70.56               |
| SDN | < 20 yr   | 38.06                                             | 100                                                                                       | 100                 | 100                 | 98.46               | 69.52               |
| SDN | 20-29 yr  | 38.15                                             | 100                                                                                       | 100                 | 100                 | 98.19               | 70.08               |
| SDN | 30-34 yr  | 38.35                                             | 100                                                                                       | 100                 | 100                 | 98.49               | 70.86               |
| SDN | > 34 yr   | 38.57                                             | 100                                                                                       | 100                 | 100                 | 98.53               | 72.53               |
| SEN | All ages  | 47.12                                             | 100                                                                                       | 100                 | 100                 | 100                 | 99.92               |
| SEN | < 20 yr   | 47.22                                             | 100                                                                                       | 100                 | 100                 | 100                 | 99.92               |
| SEN | 20-29 yr  | 47.15                                             | 100                                                                                       | 100                 | 100                 | 100                 | 99.92               |
| SEN | 30-34 yr  | 47.1                                              | 100                                                                                       | 100                 | 100                 | 100                 | 99.91               |
| SEN | > 34 yr   | 47.02                                             | 100                                                                                       | 100                 | 100                 | 100                 | 99.91               |

| ISO | Age group | PM <sub>2.5</sub> average<br>(µg/m <sup>3</sup> ) | Percentage of pregnancies exposed to PM <sub>2.5</sub> > C <sub>0</sub> µg/m <sup>3</sup> |                     |                     |                     |                     |
|-----|-----------|---------------------------------------------------|-------------------------------------------------------------------------------------------|---------------------|---------------------|---------------------|---------------------|
|     |           |                                                   | C <sub>0</sub> = 5                                                                        | C <sub>0</sub> = 10 | C <sub>0</sub> = 15 | C <sub>0</sub> = 25 | C <sub>0</sub> = 35 |
| SGP | All ages  | 27.19                                             | 100                                                                                       | 100                 | 100                 | 100                 | 0                   |
| SGP | < 20 yr   | 27.19                                             | 100                                                                                       | 100                 | 100                 | 100                 | 0                   |
| SGP | 20-29 yr  | 27.19                                             | 100                                                                                       | 100                 | 100                 | 100                 | 0                   |
| SGP | 30-34 yr  | 27.19                                             | 100                                                                                       | 100                 | 100                 | 100                 | 0                   |
| SGP | > 34 yr   | 27.19                                             | 100                                                                                       | 100                 | 100                 | 100                 | 0                   |
| SLB | All ages  | 11.36                                             | 100                                                                                       | 99.4                | 0                   | 0                   | 0                   |
| SLB | < 20 yr   | 11.36                                             | 100                                                                                       | 99.42               | 0                   | 0                   | 0                   |
| SLB | 20-29 yr  | 11.36                                             | 100                                                                                       | 99.4                | 0                   | 0                   | 0                   |
| SLB | 30-34 yr  | 11.36                                             | 100                                                                                       | 99.39               | 0                   | 0                   | 0                   |
| SLB | > 34 yr   | 11.36                                             | 100                                                                                       | 99.39               | 0                   | 0                   | 0                   |
| SLE | All ages  | 29.06                                             | 100                                                                                       | 100                 | 100                 | 99.56               | 0                   |
| SLE | < 20 yr   | 29.07                                             | 100                                                                                       | 100                 | 100                 | 99.57               | 0                   |
| SLE | 20-29 yr  | 29.04                                             | 100                                                                                       | 100                 | 100                 | 99.56               | 0                   |
| SLE | 30-34 yr  | 29.07                                             | 100                                                                                       | 100                 | 100                 | 99.56               | 0                   |
| SLE | > 34 yr   | 29.09                                             | 100                                                                                       | 100                 | 100                 | 99.56               | 0                   |
| SLV | All ages  | 29.38                                             | 100                                                                                       | 100                 | 100                 | 88.2                | 1.02                |
| SLV | < 20 yr   | 29.49                                             | 100                                                                                       | 100                 | 100                 | 88.87               | 1.13                |
| SLV | 20-29 yr  | 29.32                                             | 100                                                                                       | 100                 | 100                 | 87.84               | 1.03                |
| SLV | 30-34 yr  | 29.33                                             | 100                                                                                       | 100                 | 100                 | 87.79               | 0.91                |
| SLV | > 34 yr   | 29.59                                             | 100                                                                                       | 100                 | 100                 | 89.4                | 0.9                 |
| SOM | All ages  | 19.13                                             | 100                                                                                       | 99.75               | 62.59               | 22.98               | 3.35                |
| SOM | < 20 yr   | 19.43                                             | 100                                                                                       | 99.76               | 64.07               | 24.71               | 3.46                |
| SOM | 20-29 yr  | 19.14                                             | 100                                                                                       | 99.75               | 62.65               | 23.08               | 3.35                |
| SOM | 30-34 yr  | 18.77                                             | 100                                                                                       | 99.74               | 60.89               | 21                  | 3.17                |
| SOM | > 34 yr   | 19.18                                             | 100                                                                                       | 99.75               | 62.88               | 23.23               | 3.43                |
| SSD | All ages  | 24.79                                             | 100                                                                                       | 100                 | 99.99               | 43.36               | 0.24                |
| SSD | < 20 yr   | 24.71                                             | 100                                                                                       | 100                 | 99.99               | 42.53               | 0.25                |
| SSD | 20-29 yr  | 24.79                                             | 100                                                                                       | 100                 | 99.99               | 43.16               | 0.22                |
| SSD | 30-34 yr  | 24.82                                             | 100                                                                                       | 100                 | 99.99               | 43.65               | 0.26                |
| SSD | > 34 yr   | 24.86                                             | 100                                                                                       | 100                 | 99.99               | 44.54               | 0.25                |
| STP | All ages  | 19.56                                             | 100                                                                                       | 100                 | 100                 | 10.16               | 0                   |
| STP | < 20 yr   | 19.67                                             | 100                                                                                       | 100                 | 100                 | 10.49               | 0                   |
| STP | 20-29 yr  | 19.53                                             | 100                                                                                       | 100                 | 100                 | 10.13               | 0                   |
| STP | 30-34 yr  | 19.54                                             | 100                                                                                       | 100                 | 100                 | 10.06               | 0                   |
| STP | > 34 yr   | 19.59                                             | 100                                                                                       | 100                 | 100                 | 10.12               | 0                   |
| SUR | All ages  | 19.93                                             | 100                                                                                       | 100                 | 99.93               | 0                   | 0                   |
| SUR | < 20 yr   | 19.93                                             | 100                                                                                       | 100                 | 99.96               | 0                   | 0                   |
| SUR | 20-29 yr  | 19.95                                             | 100                                                                                       | 100                 | 99.94               | 0                   | 0                   |
| SUR | 30-34 yr  | 19.86                                             | 100                                                                                       | 100                 | 99.91               | 0                   | 0                   |
| SUR | > 34 yr   | 19.91                                             | 100                                                                                       | 100                 | 99.92               | 0                   | 0                   |
| SWZ | All ages  | 18.1                                              | 100                                                                                       | 100                 | 90.67               | 0.02                | 0                   |
| SWZ | < 20 yr   | 17.97                                             | 100                                                                                       | 100                 | 90.44               | 0.02                | 0                   |

| ISO | Age group | PM <sub>2.5</sub> average<br>(µg/m <sup>3</sup> ) | Percentage of pregnancies exposed to PM <sub>2.5</sub> > C <sub>0</sub> µg/m <sup>3</sup> |                     |                     |                     |                     |
|-----|-----------|---------------------------------------------------|-------------------------------------------------------------------------------------------|---------------------|---------------------|---------------------|---------------------|
|     |           |                                                   | C <sub>0</sub> = 5                                                                        | C <sub>0</sub> = 10 | C <sub>0</sub> = 15 | C <sub>0</sub> = 25 | C <sub>0</sub> = 35 |
| SWZ | 20-29 yr  | 18.13                                             | 100                                                                                       | 100                 | 90.74               | 0.02                | 0                   |
| SWZ | 30-34 yr  | 18.13                                             | 100                                                                                       | 100                 | 90.71               | 0.02                | 0                   |
| SWZ | > 34 yr   | 18.08                                             | 100                                                                                       | 100                 | 90.56               | 0.02                | 0                   |
| SYC | All ages  | 9.13                                              | 100                                                                                       | 2.71                | 0                   | 0                   | 0                   |
| SYC | < 20 yr   | 9.13                                              | 100                                                                                       | 2.71                | 0                   | 0                   | 0                   |
| SYC | 20-29 yr  | 9.13                                              | 100                                                                                       | 2.71                | 0                   | 0                   | 0                   |
| SYC | 30-34 yr  | 9.13                                              | 100                                                                                       | 2.71                | 0                   | 0                   | 0                   |
| SYC | > 34 yr   | 9.13                                              | 100                                                                                       | 2.71                | 0                   | 0                   | 0                   |
| SYR | All ages  | 35.21                                             | 100                                                                                       | 100                 | 100                 | 98.79               | 47.71               |
| SYR | < 20 yr   | 35.21                                             | 100                                                                                       | 100                 | 100                 | 98.79               | 47.71               |
| SYR | 20-29 yr  | 35.21                                             | 100                                                                                       | 100                 | 100                 | 98.79               | 47.72               |
| SYR | 30-34 yr  | 35.21                                             | 100                                                                                       | 100                 | 100                 | 98.79               | 47.71               |
| SYR | > 34 yr   | 35.21                                             | 100                                                                                       | 100                 | 100                 | 98.79               | 47.71               |
| TCD | All ages  | 43.16                                             | 100                                                                                       | 100                 | 100                 | 99.95               | 66.2                |
| TCD | < 20 yr   | 44.19                                             | 100                                                                                       | 100                 | 100                 | 99.96               | 68.35               |
| TCD | 20-29 yr  | 42.91                                             | 100                                                                                       | 100                 | 100                 | 99.95               | 65.95               |
| TCD | 30-34 yr  | 42.72                                             | 100                                                                                       | 100                 | 100                 | 99.95               | 64.89               |
| TCD | > 34 yr   | 43.17                                             | 100                                                                                       | 100                 | 100                 | 99.94               | 65.75               |
| TGO | All ages  | 39                                                | 100                                                                                       | 100                 | 100                 | 100                 | 57                  |
| TGO | < 20 yr   | 39.33                                             | 100                                                                                       | 100                 | 100                 | 100                 | 59.01               |
| TGO | 20-29 yr  | 38.87                                             | 100                                                                                       | 100                 | 100                 | 100                 | 56.07               |
| TGO | 30-34 yr  | 38.96                                             | 100                                                                                       | 100                 | 100                 | 100                 | 56.82               |
| TGO | > 34 yr   | 39.24                                             | 100                                                                                       | 100                 | 100                 | 100                 | 58.96               |
| THA | All ages  | 23.22                                             | 100                                                                                       | 100                 | 99.96               | 30.88               | 0.29                |
| THA | < 20 yr   | 23.47                                             | 100                                                                                       | 100                 | 99.97               | 32.89               | 0.31                |
| THA | 20-29 yr  | 23.06                                             | 100                                                                                       | 100                 | 99.96               | 29.42               | 0.26                |
| THA | 30-34 yr  | 23.28                                             | 100                                                                                       | 100                 | 99.96               | 31.45               | 0.3                 |
| THA | > 34 yr   | 23.54                                             | 100                                                                                       | 100                 | 99.97               | 33.99               | 0.36                |
| TJK | All ages  | 32.42                                             | 100                                                                                       | 99.41               | 97.46               | 86.13               | 34.33               |
| TJK | < 20 yr   | 32.54                                             | 100                                                                                       | 99.5                | 97.73               | 86.38               | 34.5                |
| TJK | 20-29 yr  | 32.43                                             | 100                                                                                       | 99.43               | 97.5                | 86.11               | 34.38               |
| TJK | 30-34 yr  | 32.32                                             | 100                                                                                       | 99.33               | 97.2                | 86.02               | 34.1                |
| TJK | > 34 yr   | 32.38                                             | 100                                                                                       | 99.35               | 97.28               | 86.33               | 34.19               |
| TKM | All ages  | 32.17                                             | 100                                                                                       | 100                 | 100                 | 88.55               | 27.55               |
| TKM | < 20 yr   | 32.18                                             | 100                                                                                       | 100                 | 100                 | 87.84               | 28.38               |
| TKM | 20-29 yr  | 32.23                                             | 100                                                                                       | 100                 | 100                 | 88.83               | 27.86               |
| TKM | 30-34 yr  | 32.02                                             | 100                                                                                       | 100                 | 100                 | 87.72               | 26.84               |
| TKM | > 34 yr   | 32.12                                             | 100                                                                                       | 100                 | 100                 | 88.62               | 26.53               |
| TLS | All ages  | 12.65                                             | 100                                                                                       | 99.64               | 0.81                | 0                   | 0                   |
| TLS | < 20 yr   | 12.62                                             | 100                                                                                       | 99.69               | 0.74                | 0                   | 0                   |
| TLS | 20-29 yr  | 12.7                                              | 100                                                                                       | 99.62               | 0.89                | 0                   | 0                   |
| TLS | 30-34 yr  | 12.59                                             | 100                                                                                       | 99.62               | 0.7                 | 0                   | 0                   |

| ISO | Age group | PM <sub>2.5</sub> average<br>(µg/m <sup>3</sup> ) | Percentage of pregnancies exposed to PM <sub>2.5</sub> > C <sub>0</sub> µg/m <sup>3</sup> |                     |                     |                     |                     |
|-----|-----------|---------------------------------------------------|-------------------------------------------------------------------------------------------|---------------------|---------------------|---------------------|---------------------|
|     |           |                                                   | C <sub>0</sub> = 5                                                                        | C <sub>0</sub> = 10 | C <sub>0</sub> = 15 | C <sub>0</sub> = 25 | C <sub>0</sub> = 35 |
| TLS | > 34 yr   | 12.59                                             | 100                                                                                       | 99.69               | 0.71                | 0                   | 0                   |
| TTO | All ages  | 17.5                                              | 100                                                                                       | 100                 | 94.13               | 0                   | 0                   |
| TTO | < 20 yr   | 17.48                                             | 100                                                                                       | 100                 | 94.13               | 0                   | 0                   |
| TTO | 20-29 yr  | 17.51                                             | 100                                                                                       | 100                 | 94.27               | 0                   | 0                   |
| TTO | 30-34 yr  | 17.48                                             | 100                                                                                       | 100                 | 93.91               | 0                   | 0                   |
| TTO | > 34 yr   | 17.48                                             | 100                                                                                       | 100                 | 94.04               | 0                   | 0                   |
| TUN | All ages  | 19.61                                             | 100                                                                                       | 99.99               | 97.23               | 2.42                | 0.1                 |
| TUN | < 20 yr   | 19.53                                             | 100                                                                                       | 99.99               | 97.25               | 2.35                | 0.1                 |
| TUN | 20-29 yr  | 19.63                                             | 100                                                                                       | 99.99               | 97.33               | 2.46                | 0.1                 |
| TUN | 30-34 yr  | 19.62                                             | 100                                                                                       | 99.99               | 97.16               | 2.39                | 0.1                 |
| TUN | > 34 yr   | 19.58                                             | 100                                                                                       | 99.99               | 97.15               | 2.37                | 0.1                 |
| TUR | All ages  | 31.08                                             | 100                                                                                       | 100                 | 100                 | 81.08               | 28.4                |
| TUR | < 20 yr   | 31.75                                             | 100                                                                                       | 100                 | 100                 | 83.1                | 32.92               |
| TUR | 20-29 yr  | 31.2                                              | 100                                                                                       | 100                 | 100                 | 81.41               | 29.25               |
| TUR | 30-34 yr  | 30.83                                             | 100                                                                                       | 100                 | 100                 | 80.32               | 26.72               |
| TUR | > 34 yr   | 30.66                                             | 100                                                                                       | 100                 | 100                 | 79.95               | 25.39               |
| TZA | All ages  | 22.01                                             | 100                                                                                       | 99.98               | 95.29               | 21.15               | 0.89                |
| TZA | < 20 yr   | 22.17                                             | 100                                                                                       | 99.98               | 95.15               | 22.19               | 0.91                |
| TZA | 20-29 yr  | 22.01                                             | 100                                                                                       | 99.98               | 95.47               | 21.08               | 0.87                |
| TZA | 30-34 yr  | 21.93                                             | 100                                                                                       | 99.98               | 95.35               | 20.76               | 0.89                |
| TZA | > 34 yr   | 21.88                                             | 100                                                                                       | 99.98               | 94.81               | 20.66               | 0.91                |
| UGA | All ages  | 31.18                                             | 100                                                                                       | 100                 | 99.97               | 75.62               | 41.09               |
| UGA | < 20 yr   | 31.32                                             | 100                                                                                       | 100                 | 99.97               | 75.99               | 42.17               |
| UGA | 20-29 yr  | 31.24                                             | 100                                                                                       | 100                 | 99.97               | 75.73               | 41.59               |
| UGA | 30-34 yr  | 30.95                                             | 100                                                                                       | 100                 | 99.97               | 74.99               | 39.24               |
| UGA | > 34 yr   | 31.03                                             | 100                                                                                       | 100                 | 99.98               | 75.35               | 39.58               |
| URY | All ages  | 11.91                                             | 100                                                                                       | 87.18               | 0                   | 0                   | 0                   |
| URY | < 20 yr   | 11.74                                             | 100                                                                                       | 84.59               | 0                   | 0                   | 0                   |
| URY | 20-29 yr  | 11.97                                             | 100                                                                                       | 88.02               | 0                   | 0                   | 0                   |
| URY | 30-34 yr  | 11.92                                             | 100                                                                                       | 87.53               | 0                   | 0                   | 0                   |
| URY | > 34 yr   | 11.88                                             | 100                                                                                       | 86.88               | 0                   | 0                   | 0                   |
| UZB | All ages  | 34.43                                             | 100                                                                                       | 100                 | 100                 | 92.36               | 41.93               |
| UZB | < 20 yr   | 34.53                                             | 100                                                                                       | 100                 | 100                 | 92.3                | 42.67               |
| UZB | 20-29 yr  | 34.39                                             | 100                                                                                       | 100                 | 100                 | 92.31               | 41.73               |
| UZB | 30-34 yr  | 34.46                                             | 100                                                                                       | 100                 | 100                 | 92.49               | 42.13               |
| UZB | > 34 yr   | 34.65                                             | 100                                                                                       | 100                 | 100                 | 92.75               | 43                  |
| VCT | All ages  | 16.26                                             | 100                                                                                       | 100                 | 92.74               | 0                   | 0                   |
| VCT | < 20 yr   | 16.26                                             | 100                                                                                       | 100                 | 92.43               | 0                   | 0                   |
| VCT | 20-29 yr  | 16.26                                             | 100                                                                                       | 100                 | 92.78               | 0                   | 0                   |
| VCT | 30-34 yr  | 16.26                                             | 100                                                                                       | 100                 | 92.86               | 0                   | 0                   |
| VCT | > 34 yr   | 16.26                                             | 100                                                                                       | 100                 | 92.73               | 0                   | 0                   |
| VEN | All ages  | 21.61                                             | 100                                                                                       | 99.94               | 94.85               | 11.19               | 0                   |

| ISO | Age group | PM <sub>2.5</sub> average<br>(µg/m <sup>3</sup> ) | Percentage of pregnancies exposed to PM <sub>2.5</sub> > C <sub>0</sub> µg/m <sup>3</sup> |                     |                     |                     |                     |
|-----|-----------|---------------------------------------------------|-------------------------------------------------------------------------------------------|---------------------|---------------------|---------------------|---------------------|
|     |           |                                                   | C <sub>0</sub> = 5                                                                        | C <sub>0</sub> = 10 | C <sub>0</sub> = 15 | C <sub>0</sub> = 25 | C <sub>0</sub> = 35 |
| VEN | < 20 yr   | 21.56                                             | 100                                                                                       | 99.94               | 94.77               | 11.62               | 0                   |
| VEN | 20-29 yr  | 21.61                                             | 100                                                                                       | 99.94               | 94.88               | 11.11               | 0                   |
| VEN | 30-34 yr  | 21.64                                             | 100                                                                                       | 99.94               | 94.88               | 10.91               | 0                   |
| VEN | > 34 yr   | 21.65                                             | 100                                                                                       | 99.94               | 94.88               | 10.97               | 0                   |
| VNM | All ages  | 27.93                                             | 100                                                                                       | 100                 | 99.86               | 54.67               | 26                  |
| VNM | < 20 yr   | 28                                                | 100                                                                                       | 100                 | 99.85               | 54.95               | 26.2                |
| VNM | 20-29 yr  | 28.01                                             | 100                                                                                       | 100                 | 99.86               | 55.13               | 26.37               |
| VNM | 30-34 yr  | 27.79                                             | 100                                                                                       | 100                 | 99.85               | 53.88               | 25.43               |
| VNM | > 34 yr   | 27.61                                             | 100                                                                                       | 100                 | 99.84               | 53                  | 24.54               |
| YEM | All ages  | 45.8                                              | 100                                                                                       | 100                 | 100                 | 99.86               | 97.82               |
| YEM | < 20 yr   | 45.65                                             | 100                                                                                       | 100                 | 100                 | 99.87               | 97.86               |
| YEM | 20-29 yr  | 45.76                                             | 100                                                                                       | 100                 | 100                 | 99.87               | 97.88               |
| YEM | 30-34 yr  | 45.93                                             | 100                                                                                       | 100                 | 100                 | 99.84               | 97.64               |
| YEM | > 34 yr   | 45.92                                             | 100                                                                                       | 100                 | 100                 | 99.86               | 97.71               |
| ZAF | All ages  | 25.93                                             | 99.91                                                                                     | 88                  | 74.32               | 36.21               | 24.63               |
| ZAF | < 20 yr   | 23.7                                              | 99.93                                                                                     | 89.76               | 73.44               | 29.54               | 17.84               |
| ZAF | 20-29 yr  | 26.17                                             | 99.91                                                                                     | 88.06               | 74.64               | 36.75               | 25.22               |
| ZAF | 30-34 yr  | 26.63                                             | 99.91                                                                                     | 87.52               | 74.66               | 38.35               | 26.8                |
| ZAF | > 34 yr   | 25.92                                             | 99.91                                                                                     | 86.74               | 73.15               | 36.85               | 25.12               |
| ZMB | All ages  | 23.48                                             | 100                                                                                       | 100                 | 100                 | 37.48               | 0                   |
| ZMB | < 20 yr   | 23.55                                             | 100                                                                                       | 100                 | 100                 | 37.92               | 0                   |
| ZMB | 20-29 yr  | 23.42                                             | 100                                                                                       | 100                 | 100                 | 36.96               | 0                   |
| ZMB | 30-34 yr  | 23.51                                             | 100                                                                                       | 100                 | 100                 | 37.9                | 0                   |
| ZMB | > 34 yr   | 23.61                                             | 100                                                                                       | 100                 | 100                 | 38.37               | 0                   |
| ZWE | All ages  | 18.82                                             | 100                                                                                       | 100                 | 92.22               | 0.16                | 0                   |
| ZWE | < 20 yr   | 18.75                                             | 100                                                                                       | 100                 | 91.89               | 0.17                | 0                   |
| ZWE | 20-29 yr  | 18.86                                             | 100                                                                                       | 100                 | 92.43               | 0.15                | 0                   |
| ZWE | 30-34 yr  | 18.81                                             | 100                                                                                       | 100                 | 92.15               | 0.16                | 0                   |
| ZWE | > 34 yr   | 18.76                                             | 100                                                                                       | 100                 | 91.64               | 0.18                | 0                   |

73

74

75 Supplementary Table 4 Country-level estimates on fraction or number of stillbirths attributable to PM<sub>2.5</sub> in 2015 referring to different exposure levels of  
 76 minimum risk and using different exposure-response methods.

| IS<br>O     | Total number<br>of stillbirths         | Method                     | Fraction of stillbirths attributable to PM <sub>2.5</sub> > C <sub>0</sub> µg/m <sup>3</sup> |                            |                            |                            |                           | Number of stillbirths attributable to PM <sub>2.5</sub> > C <sub>0</sub> µg/m <sup>3</sup> |                                    |                                    |                                  |                                  |
|-------------|----------------------------------------|----------------------------|----------------------------------------------------------------------------------------------|----------------------------|----------------------------|----------------------------|---------------------------|--------------------------------------------------------------------------------------------|------------------------------------|------------------------------------|----------------------------------|----------------------------------|
|             |                                        |                            | C <sub>0</sub> = 5                                                                           | C <sub>0</sub> = 10        | C <sub>0</sub> = 15        | C <sub>0</sub> = 25        | C <sub>0</sub> = 35       | C <sub>0</sub> = 5                                                                         | C <sub>0</sub> = 10                | C <sub>0</sub> = 15                | C <sub>0</sub> = 25              | C <sub>0</sub> = 35              |
| A<br>L<br>L | 2,089,918<br>(1,982,393,<br>2,200,882) | Age-<br>specific<br>curves | 45.51<br>(29.24,<br>58.07)                                                                   | 39.66<br>(26.07,<br>50.85) | 33.50<br>(22.77,<br>42.70) | 22.05<br>(15.55,<br>27.71) | 13.45<br>(8.60,<br>17.68) | 951,060<br>(610,754,<br>1,234,209)                                                         | 828,952<br>(543,961,<br>1,075,969) | 700,224<br>(481,018,<br>899,490)   | 460,790<br>(317,459,<br>582,504) | 281,112<br>(179,375,<br>367,804) |
| A<br>L<br>L | 2,089,918<br>(1,982,393,<br>2,200,882) | All-ages<br>curve          | 44.45<br>(26.36,<br>58.01)                                                                   | 38.59<br>(19.14,<br>53.53) | 32.54<br>(13.21,<br>48.62) | 21.77<br>(5.87,<br>38.41)  | 13.88<br>(2.60,<br>29.31) | 928,901<br>(567,714,<br>1,220,350)                                                         | 806,574<br>(413,107,<br>1,123,792) | 680,031<br>(278,718,<br>1,021,294) | 454,903<br>(121,082,<br>808,733) | 290,087<br>(54,168,<br>620,742)  |
| A<br>L<br>L | 2,089,918<br>(1,982,393,<br>2,200,882) | Zhang et<br>al. 2021       | 29.39<br>(21.81,<br>35.57)                                                                   | 25.93<br>(18.04,<br>32.40) | 22.44<br>(14.50,<br>29.13) | 16.18<br>(8.98,<br>22.79)  | 11.39<br>(5.40,<br>17.41) | 614,306<br>(454,617,<br>750,733)                                                           | 541,848<br>(376,134,<br>682,720)   | 469,028<br>(302,353,<br>614,199)   | 338,153<br>(187,357,<br>481,508) | 237,965<br>(112,800,<br>368,306) |
| A<br>L<br>L | 2,089,918<br>(1,982,393,<br>2,200,882) | Xie et<br>al. 2021         | 38.15<br>(19.29,<br>52.98)                                                                   | 33.69<br>(14.13,<br>49.55) | 29.22<br>(10.08,<br>45.91) | 21.27<br>(5.02,<br>38.48)  | 15.26<br>(2.42,<br>31.62) | 797,205<br>(403,038,<br>1,092,148)                                                         | 704,081<br>(296,335,<br>1,023,507) | 610,631<br>(211,441,<br>949,540)   | 444,582<br>(105,226,<br>794,868) | 319,002<br>(50,827,<br>650,300)  |
| A<br>F<br>G | 37,252<br>(20,065,<br>54,486)          | Age-<br>specific<br>curves | 47.50<br>(29.36,<br>61.79)                                                                   | 41.84<br>(25.68,<br>55.15) | 35.56<br>(21.79,<br>47.41) | 21.69<br>(14.37,<br>29.04) | 8.76<br>(5.85,<br>11.47)  | 17,693<br>(8,181,<br>27,782)                                                               | 15,585<br>(7,211,<br>24,508)       | 13,248<br>(6,192,<br>20,953)       | 8,081<br>(3,889,<br>12,909)      | 3,262<br>(1,571,<br>5,322)       |
| A<br>F<br>G | 37,252<br>(20,065,<br>54,486)          | All-ages<br>curve          | 46.12<br>(27.00,<br>62.23)                                                                   | 40.23<br>(19.38,<br>58.19) | 33.71<br>(11.73,<br>53.68) | 20.06<br>(2.93,<br>43.43)  | 10.23<br>(0.82,<br>32.59) | 17,181<br>(7,439,<br>27,604)                                                               | 14,987<br>(5,803,<br>25,137)       | 12,557<br>(3,603,<br>22,768)       | 7,474 (903,<br>17,085)           | 3,810 (265,<br>12,113)           |
| A<br>F<br>G | 37,252<br>(20,065,<br>54,486)          | Zhang et<br>al. 2021       | 28.25<br>(20.58,<br>34.69)                                                                   | 24.68<br>(16.66,<br>31.48) | 20.94<br>(12.59,<br>28.11) | 13.15<br>(5.10,<br>20.92)  | 6.36<br>(1.36,<br>13.52)  | 10,523<br>(5,567,<br>16,151)                                                               | 9,195 (4,668,<br>14,400)           | 7,801 (3,547,<br>12,832)           | 4,899<br>(1,636,<br>9,330)       | 2,370 (481,<br>5,859)            |
| A<br>F<br>G | 37,252<br>(20,065,<br>54,486)          | Xie et<br>al. 2021         | 37.44<br>(17.94,<br>53.60)                                                                   | 32.84<br>(11.99,<br>50.20) | 27.91<br>(6.67,<br>46.54)  | 17.63<br>(1.67,<br>38.38)  | 9.72<br>(0.50,<br>29.45)  | 13,945<br>(5,010,<br>23,646)                                                               | 12,235<br>(3,791,<br>21,678)       | 10,398<br>(2,214,<br>19,991)       | 6,569 (530,<br>15,768)           | 3,620 (174,<br>11,988)           |
| A<br>G<br>O | 25,458<br>(15,565,<br>35,943)          | Age-<br>specific<br>curves | 28.40<br>(15.50,<br>40.77)                                                                   | 20.61<br>(11.11,<br>30.19) | 12.46<br>(6.65,<br>18.53)  | 1.88<br>(1.11,<br>2.71)    | 0.14<br>(0.09,<br>0.20)   | 7,229 (3,010,<br>12,400)                                                                   | 5,247 (2,181,<br>9,173)            | 3,173 (1,328,<br>5,627)            | 478 (233,<br>818)                | 36 (18, 61)                      |
| A<br>G<br>O | 25,458<br>(15,565,<br>35,943)          | All-ages<br>curve          | 27.31<br>(11.80,<br>41.02)                                                                   | 19.38<br>(4.31,<br>34.78)  | 11.60<br>(1.25,<br>27.92)  | 3.39<br>(0.14,<br>14.98)   | 0.95<br>(0.02,<br>7.18)   | 6,952 (2,589,<br>12,240)                                                                   | 4,933 (913,<br>10,142)             | 2,954 (278,<br>7,899)              | 862 (38,<br>3,967)               | 243 (6,<br>1,778)                |
| A<br>G<br>O | 25,458<br>(15,565,<br>35,943)          | Zhang et<br>al. 2021       | 14.91<br>(10.02,<br>19.31)                                                                   | 10.67<br>(5.67,<br>15.36)  | 6.48<br>(2.12,<br>11.26)   | 1.27<br>(0.16,<br>4.09)    | 0.19<br>(0.01,<br>0.97)   | 3,797 (1,844,<br>5,748)                                                                    | 2,718 (1,109,<br>4,540)            | 1,649 (460,<br>3,200)              | 325 (38,<br>1,072)               | 47 (2, 251)                      |

| IS<br>O     | Total number<br>of stillbirths | Method                     | Fraction of stillbirths attributable to $PM_{2.5} > C_0 \mu g/m^3$ |                            |                            |                            |                            | Number of stillbirths attributable to $PM_{2.5} > C_0 \mu g/m^3$ |                       |                       |                    |                    |
|-------------|--------------------------------|----------------------------|--------------------------------------------------------------------|----------------------------|----------------------------|----------------------------|----------------------------|------------------------------------------------------------------|-----------------------|-----------------------|--------------------|--------------------|
|             |                                |                            | $C_0 = 5$                                                          | $C_0 = 10$                 | $C_0 = 15$                 | $C_0 = 25$                 | $C_0 = 35$                 | $C_0 = 5$                                                        | $C_0 = 10$            | $C_0 = 15$            | $C_0 = 25$         | $C_0 = 35$         |
| A<br>G<br>O | 25,458<br>(15,565,<br>35,943)  | Xie et<br>al. 2021         | 20.38<br>(7.46,<br>32.77)                                          | 14.53<br>(2.33,<br>27.90)  | 8.81<br>(0.65,<br>22.70)   | 2.59<br>(0.11,<br>12.48)   | 0.82<br>(0.04,<br>5.57)    | 5,188 (1,845,<br>9,186)                                          | 3,700 (622,<br>7,652) | 2,244 (183,<br>5,824) | 659 (28,<br>3,116) | 210 (11,<br>1,345) |
| A<br>R<br>E | 525 (488, 561)                 | Age-<br>specific<br>curves | 64.63<br>(46.47,<br>76.45)                                         | 60.90<br>(44.22,<br>72.76) | 56.77<br>(42.38,<br>67.86) | 47.19<br>(34.14,<br>57.29) | 35.90<br>(24.00,<br>45.39) | 339 (246,<br>407)                                                | 320 (235,<br>385)     | 298 (221,<br>360)     | 248 (181,<br>304)  | 188 (124,<br>237)  |
| A<br>R<br>E | 525 (488, 561)                 | All-ages<br>curve          | 60.06<br>(39.51,<br>73.11)                                         | 55.72<br>(33.00,<br>70.26) | 50.88<br>(25.75,<br>67.08) | 39.73<br>(11.47,<br>59.78) | 27.55<br>(3.73,<br>51.53)  | 315 (208,<br>390)                                                | 293 (173,<br>374)     | 267 (134,<br>357)     | 209 (59,<br>317)   | 145 (19,<br>271)   |
| A<br>R<br>E | 525 (488, 561)                 | Zhang et<br>al. 2021       | 42.77<br>(32.66,<br>50.78)                                         | 39.93<br>(29.34,<br>48.35) | 36.95<br>(25.87,<br>45.80) | 30.52<br>(18.37,<br>40.30) | 23.43<br>(10.32,<br>34.24) | 225 (169,<br>268)                                                | 210 (152,<br>255)     | 194 (135,<br>241)     | 160 (96,<br>212)   | 123 (54,<br>180)   |
| A<br>R<br>E | 525 (488, 561)                 | Xie et<br>al. 2021         | 54.71<br>(30.07,<br>72.09)                                         | 51.40<br>(24.98,<br>70.05) | 47.83<br>(19.50,<br>67.85) | 39.83<br>(8.98,<br>62.91)  | 30.59<br>(3.25,<br>57.14)  | 287 (158,<br>376)                                                | 270 (132,<br>365)     | 251 (103,<br>352)     | 209 (48,<br>327)   | 161 (17,<br>297)   |
| A<br>R<br>G | 3,871 (3,760,<br>3,994)        | Age-<br>specific<br>curves | 17.38<br>(9.06,<br>26.20)                                          | 8.42<br>(4.34,<br>12.92)   | 2.42<br>(1.28,<br>3.74)    | 0.06<br>(0.04,<br>0.12)    | 0.00<br>(0.00,<br>0.00)    | 673 (345,<br>1,029)                                              | 326 (165,<br>507)     | 94 (49, 147)          | 2 (1, 5)           | 0 (0, 0)           |
| A<br>R<br>G | 3,871 (3,760,<br>3,994)        | All-ages<br>curve          | 17.06<br>(4.83,<br>27.87)                                          | 9.15<br>(0.78,<br>20.30)   | 3.67<br>(0.14,<br>12.80)   | 0.78<br>(0.01,<br>4.02)    | 0.29<br>(0.00,<br>1.44)    | 661 (186,<br>1,088)                                              | 354 (30,<br>789)      | 142 (5, 496)          | 30 (0, 156)        | 11 (0, 56)         |
| A<br>R<br>G | 3,871 (3,760,<br>3,994)        | Zhang et<br>al. 2021       | 8.82<br>(5.31,<br>11.94)                                           | 4.39<br>(1.48,<br>7.57)    | 1.45<br>(0.22,<br>3.65)    | 0.07<br>(0.00,<br>0.46)    | 0.00<br>(0.00,<br>0.04)    | 342 (200,<br>464)                                                | 170 (56,<br>295)      | 56 (8, 142)           | 3 (0, 18)          | 0 (0, 2)           |
| A<br>R<br>G | 3,871 (3,760,<br>3,994)        | Xie et<br>al. 2021         | 12.22<br>(3.00,<br>21.50)                                          | 6.33<br>(0.48,<br>15.70)   | 2.65<br>(0.10,<br>9.93)    | 0.58<br>(0.03,<br>3.20)    | 0.22<br>(0.01,<br>1.08)    | 473 (116,<br>823)                                                | 245 (19,<br>604)      | 103 (4, 389)          | 22 (1, 124)        | 8 (0, 42)          |
| A<br>R<br>M | 608 (562, 654)                 | Age-<br>specific<br>curves | 41.87<br>(23.29,<br>56.85)                                         | 35.53<br>(19.68,<br>49.24) | 28.50<br>(15.77,<br>40.27) | 12.65<br>(7.03,<br>18.34)  | 1.11<br>(0.66,<br>1.60)    | 255 (138,<br>353)                                                | 216 (115,<br>306)     | 173 (93,<br>250)      | 77 (43, 113)       | 7 (4, 10)          |
| A<br>R<br>M | 608 (562, 654)                 | All-ages<br>curve          | 40.92<br>(21.81,<br>56.60)                                         | 34.73<br>(13.45,<br>52.01) | 27.85<br>(6.31,<br>46.88)  | 13.85<br>(0.55,<br>34.95)  | 5.52<br>(0.06,<br>22.88)   | 249 (133,<br>350)                                                | 211 (82,<br>320)      | 169 (39,<br>284)      | 84 (3, 214)        | 34 (0, 144)        |
| A<br>R<br>M | 608 (562, 654)                 | Zhang et<br>al. 2021       | 23.48<br>(16.70,<br>29.31)                                         | 19.67<br>(12.59,<br>25.83) | 15.67<br>(8.27,<br>22.17)  | 7.28<br>(1.44,<br>14.30)   | 1.48<br>(0.03,<br>6.66)    | 143 (99,<br>179)                                                 | 120 (74,<br>158)      | 95 (49, 136)          | 44 (9, 85)         | 9 (0, 39)          |



| IS<br>O     | Total number<br>of stillbirths | Method              | Fraction of stillbirths attributable to $PM_{2.5} > C_0 \mu g/m^3$ |                            |                            |                            |                          | Number of stillbirths attributable to $PM_{2.5} > C_0 \mu g/m^3$ |                         |                         |                            |                    |
|-------------|--------------------------------|---------------------|--------------------------------------------------------------------|----------------------------|----------------------------|----------------------------|--------------------------|------------------------------------------------------------------|-------------------------|-------------------------|----------------------------|--------------------|
|             |                                |                     | $C_0 = 5$                                                          | $C_0 = 10$                 | $C_0 = 15$                 | $C_0 = 25$                 | $C_0 = 35$               | $C_0 = 5$                                                        | $C_0 = 10$              | $C_0 = 15$              | $C_0 = 25$                 | $C_0 = 35$         |
| A<br>R<br>M | 608 (562, 654)                 | Xie et al. 2021     | 31.58<br>(14.07,<br>46.97)                                         | 26.54<br>(7.85,<br>43.06)  | 21.10<br>(3.28,<br>38.79)  | 10.36<br>(0.35,<br>29.17)  | 3.70<br>(0.08,<br>18.93) | 192 (84,<br>285)                                                 | 161 (47,<br>261)        | 128 (20,<br>235)        | 63 (2, 179)                | 23 (0, 117)        |
| A<br>T<br>G | 9 (5, 12)                      | Age-specific curves | 15.68<br>(7.80,<br>23.89)                                          | 6.64<br>(3.23,<br>10.41)   | 0.00<br>(0.00,<br>0.04)    | 0.00<br>(0.00,<br>0.06)    | 0.00<br>(0.00,<br>0.00)  | 1 (1, 2)                                                         | 1 (0, 1)                | 0 (0, 0)                | 0 (0, 0)                   | 0 (0, 0)           |
| A<br>T<br>G | 9 (5, 12)                      | All-ages curve      | 15.03<br>(3.54,<br>26.47)                                          | 6.24<br>(0.27,<br>18.85)   | 2.29<br>(0.00,<br>11.03)   | 0.01<br>(0.00,<br>3.11)    | 0.00<br>(0.00,<br>1.42)  | 1 (0, 3)                                                         | 1 (0, 2)                | 0 (0, 1)                | 0 (0, 0)                   | 0 (0, 0)           |
| A<br>T<br>G | 9 (5, 12)                      | Zhang et al. 2021   | 7.87<br>(4.64,<br>10.94)                                           | 3.24<br>(0.46,<br>6.60)    | 0.31<br>(0.00,<br>2.22)    | 0.00<br>(0.00,<br>0.01)    | 0.00<br>(0.00,<br>0.00)  | 1 (0, 1)                                                         | 0 (0, 1)                | 0 (0, 0)                | 0 (0, 0)                   | 0 (0, 0)           |
| A<br>T<br>G | 9 (5, 12)                      | Xie et al. 2021     | 10.61<br>(2.37,<br>19.91)                                          | 4.15<br>(0.19,<br>14.15)   | 0.97<br>(0.00,<br>8.34)    | 0.03<br>(0.00,<br>1.92)    | 0.01<br>(0.00,<br>0.84)  | 1 (0, 2)                                                         | 0 (0, 1)                | 0 (0, 1)                | 0 (0, 0)                   | 0 (0, 0)           |
| A<br>Z<br>E | 1,833 (1,189,<br>2,464)        | Age-specific curves | 34.35<br>(17.86,<br>48.02)                                         | 27.19<br>(13.95,<br>38.88) | 19.26<br>(9.83,<br>28.14)  | 2.91<br>(1.54,<br>4.38)    | 0.00<br>(0.00,<br>0.00)  | 630 (320,<br>1,027)                                              | 498 (250,<br>825)       | 353 (175,<br>592)       | 53 (26, 90)                | 0 (0, 0)           |
| A<br>Z<br>E | 1,833 (1,189,<br>2,464)        | All-ages curve      | 33.44<br>(15.65,<br>48.19)                                         | 26.32<br>(7.07,<br>42.68)  | 18.44<br>(1.90,<br>36.56)  | 5.92<br>(0.16,<br>23.06)   | 1.26<br>(0.00,<br>11.71) | 613 (253,<br>1,018)                                              | 482 (119,<br>891)       | 338 (33,<br>759)        | 108 (3, 455)               | 23 (0, 218)        |
| A<br>Z<br>E | 1,833 (1,189,<br>2,464)        | Zhang et al. 2021   | 18.45<br>(12.69,<br>23.41)                                         | 14.44<br>(8.36,<br>19.62)  | 10.23<br>(3.93,<br>15.65)  | 2.29<br>(0.09,<br>7.27)    | 0.13<br>(0.00,<br>1.44)  | 338 (181,<br>501)                                                | 265 (117,<br>405)       | 188 (59,<br>304)        | 42 (2, 138)                | 2 (0, 26)          |
| A<br>Z<br>E | 1,833 (1,189,<br>2,464)        | Xie et al. 2021     | 25.10<br>(10.10,<br>38.88)                                         | 19.64<br>(3.88,<br>34.39)  | 13.81<br>(0.98,<br>29.54)  | 4.43<br>(0.14,<br>18.81)   | 0.96<br>(0.04,<br>9.26)  | 460 (161,<br>779)                                                | 360 (69,<br>678)        | 253 (18,<br>569)        | 81 (2, 360)                | 18 (1, 179)        |
| B<br>DI     | 11,040 (9,749,<br>12,453)      | Age-specific curves | 47.36<br>(27.66,<br>62.82)                                         | 41.64<br>(23.99,<br>56.12) | 35.28<br>(20.17,<br>48.20) | 20.62<br>(12.07,<br>28.91) | 4.19<br>(2.62,<br>5.85)  | 5,229 (3,045,<br>6,832)                                          | 4,597 (2,646,<br>6,096) | 3,894 (2,246,<br>5,230) | 2,276<br>(1,345,<br>3,150) | 463 (294,<br>634)  |
| B<br>DI     | 11,040 (9,749,<br>12,453)      | All-ages curve      | 45.61<br>(25.89,<br>61.84)                                         | 39.74<br>(17.69,<br>57.73) | 33.19<br>(9.09,<br>53.16)  | 18.76<br>(1.38,<br>42.70)  | 8.50<br>(0.23,<br>31.10) | 5,035 (2,696,<br>7,083)                                          | 4,387 (1,883,<br>6,688) | 3,664 (1,017,<br>6,194) | 2,071 (152,<br>4,988)      | 938 (24,<br>3,661) |
| B<br>DI     | 11,040 (9,749,<br>12,453)      | Zhang et al. 2021   | 26.99<br>(19.53,<br>33.39)                                         | 23.30<br>(15.56,<br>30.10) | 19.43<br>(11.39,<br>26.64) | 11.07<br>(3.02,<br>19.24)  | 3.22<br>(0.15,<br>11.12) | 2,979 (2,047,<br>3,759)                                          | 2,573 (1,643,<br>3,376) | 2,145 (1,217,<br>2,977) | 1,222 (335,<br>2,120)      | 356 (17,<br>1,228) |

| IS<br>O     | Total number<br>of stillbirths | Method                     | Fraction of stillbirths attributable to $PM_{2.5} > C_0 \mu g/m^3$ |                            |                            |                            |                            | Number of stillbirths attributable to $PM_{2.5} > C_0 \mu g/m^3$ |                               |                               |                               |                               |
|-------------|--------------------------------|----------------------------|--------------------------------------------------------------------|----------------------------|----------------------------|----------------------------|----------------------------|------------------------------------------------------------------|-------------------------------|-------------------------------|-------------------------------|-------------------------------|
|             |                                |                            | $C_0 = 5$                                                          | $C_0 = 10$                 | $C_0 = 15$                 | $C_0 = 25$                 | $C_0 = 35$                 | $C_0 = 5$                                                        | $C_0 = 10$                    | $C_0 = 15$                    | $C_0 = 25$                    | $C_0 = 35$                    |
| B<br>DI     | 11,040 (9,749,<br>12,453)      | Xie et<br>al. 2021         | 36.18<br>(17.02,<br>52.40)                                         | 31.58<br>(11.03,<br>48.90) | 26.62<br>(5.42,<br>45.12)  | 15.58<br>(0.89,<br>36.77)  | 6.74<br>(0.22,<br>27.06)   | 3,994 (1,806,<br>5,902)                                          | 3,486 (1,170,<br>5,425)       | 2,939 (575,<br>4,943)         | 1,720 (100,<br>3,998)         | 744 (23,<br>2,859)            |
| B<br>E<br>N | 8,629 (8,196,<br>9,072)        | Age-<br>specific<br>curves | 50.58<br>(31.64,<br>64.80)                                         | 45.25<br>(28.14,<br>58.74) | 39.34<br>(25.08,<br>51.62) | 25.79<br>(17.28,<br>34.06) | 10.90<br>(7.01,<br>14.02)  | 4,364 (2,766,<br>5,616)                                          | 3,905 (2,466,<br>5,087)       | 3,395 (2,141,<br>4,446)       | 2,226<br>(1,488,<br>2,943)    | 940 (609,<br>1,222)           |
| B<br>E<br>N | 8,629 (8,196,<br>9,072)        | All-ages<br>curve          | 49.20<br>(29.24,<br>64.70)                                         | 43.81<br>(21.87,<br>60.88) | 37.82<br>(13.92,<br>56.63) | 24.31<br>(3.76,<br>46.87)  | 12.59<br>(1.11,<br>35.89)  | 4,245 (2,525,<br>5,598)                                          | 3,780 (1,880,<br>5,256)       | 3,263 (1,196,<br>4,881)       | 2,098 (338,<br>4,019)         | 1,086 (100,<br>3,112)         |
| B<br>E<br>N | 8,629 (8,196,<br>9,072)        | Zhang et<br>al. 2021       | 30.79<br>(22.62,<br>37.54)                                         | 27.35<br>(18.80,<br>34.44) | 23.74<br>(14.79,<br>31.18) | 15.94<br>(6.60,<br>24.21)  | 8.51<br>(2.46,<br>16.55)   | 2,657 (1,966,<br>3,292)                                          | 2,360 (1,639,<br>3,029)       | 2,048 (1,295,<br>2,740)       | 1,375 (580,<br>2,125)         | 735 (217,<br>1,443)           |
| B<br>E<br>N | 8,629 (8,196,<br>9,072)        | Xie et<br>al. 2021         | 40.56<br>(20.13,<br>57.17)                                         | 36.18<br>(14.36,<br>54.01) | 31.44<br>(8.59,<br>50.60)  | 21.19<br>(2.55,<br>42.94)  | 12.76<br>(0.79,<br>34.02)  | 3,500 (1,698,<br>4,895)                                          | 3,122 (1,221,<br>4,619)       | 2,713 (738,<br>4,313)         | 1,828 (216,<br>3,655)         | 1,101 (68,<br>2,918)          |
| B<br>F<br>A | 14,744<br>(14,033,<br>15,410)  | Age-<br>specific<br>curves | 53.03<br>(33.37,<br>67.30)                                         | 47.95<br>(30.31,<br>61.67) | 42.31<br>(27.39,<br>55.04) | 29.37<br>(19.66,<br>38.70) | 14.80<br>(9.93,<br>19.30)  | 7,818 (4,916,<br>9,870)                                          | 7,069 (4,494,<br>8,989)       | 6,238 (4,061,<br>8,016)       | 4,330<br>(2,906,<br>5,694)    | 2,182<br>(1,444,<br>2,895)    |
| B<br>F<br>A | 14,744<br>(14,033,<br>15,410)  | All-ages<br>curve          | 51.24<br>(30.56,<br>66.72)                                         | 46.03<br>(23.13,<br>63.14) | 40.23<br>(15.02,<br>59.14) | 27.09<br>(3.97,<br>49.98)  | 15.46<br>(1.04,<br>39.71)  | 7,555 (4,523,<br>9,792)                                          | 6,787 (3,431,<br>9,266)       | 5,931 (2,229,<br>8,680)       | 3,994 (589,<br>7,332)         | 2,279 (154,<br>5,840)         |
| B<br>F<br>A | 14,744<br>(14,033,<br>15,410)  | Zhang et<br>al. 2021       | 32.26<br>(23.79,<br>39.24)                                         | 28.92<br>(20.03,<br>36.23) | 25.40<br>(16.07,<br>33.06) | 17.83<br>(7.77,<br>26.25)  | 9.86<br>(1.90,<br>18.74)   | 4,757 (3,477,<br>5,819)                                          | 4,263 (2,928,<br>5,377)       | 3,745 (2,349,<br>4,922)       | 2,628<br>(1,134,<br>3,931)    | 1,454 (277,<br>2,808)         |
| B<br>F<br>A | 14,744<br>(14,033,<br>15,410)  | Xie et<br>al. 2021         | 42.45<br>(21.16,<br>59.47)                                         | 38.24<br>(15.36,<br>56.50) | 33.70<br>(9.39,<br>53.29)  | 23.58<br>(2.21,<br>46.08)  | 13.69<br>(0.60,<br>37.67)  | 6,259 (3,129,<br>8,794)                                          | 5,638 (2,275,<br>8,350)       | 4,969 (1,391,<br>7,853)       | 3,476 (328,<br>6,780)         | 2,018 (87,<br>5,535)          |
| B<br>G<br>D | 82,980<br>(72,235,<br>92,339)  | Age-<br>specific<br>curves | 62.81<br>(45.63,<br>75.08)                                         | 58.77<br>(43.14,<br>70.56) | 54.29<br>(39.89,<br>65.92) | 44.11<br>(28.47,<br>55.94) | 32.77<br>(19.15,<br>45.31) | 52,116<br>(37,874,<br>64,287)                                    | 48,765<br>(35,430,<br>60,640) | 45,052<br>(31,353,<br>56,173) | 36,606<br>(24,443,<br>47,290) | 27,193<br>(16,380,<br>38,385) |
| B<br>G<br>D | 82,980<br>(72,235,<br>92,339)  | All-ages<br>curve          | 62.37<br>(42.41,<br>75.12)                                         | 58.35<br>(36.20,<br>72.45) | 53.87<br>(29.33,<br>69.46) | 43.58<br>(15.22,<br>62.61) | 32.17<br>(6.30,<br>54.89)  | 51,755<br>(35,835,<br>65,266)                                    | 48,418<br>(30,457,<br>62,410) | 44,701<br>(24,623,<br>59,212) | 36,165<br>(12,947,<br>52,100) | 26,696<br>(5,402,<br>45,930)  |
| B<br>G<br>D | 82,980<br>(72,235,<br>92,339)  | Zhang et<br>al. 2021       | 46.62<br>(36.01,<br>54.84)                                         | 43.99<br>(32.85,<br>52.61) | 41.22<br>(29.53,<br>50.26) | 35.25<br>(22.38,<br>45.21) | 28.68<br>(14.75,<br>39.64) | 38,689<br>(28,707,<br>48,483)                                    | 36,501<br>(26,298,<br>46,289) | 34,203<br>(23,741,<br>43,751) | 29,254<br>(17,901,<br>38,933) | 23,795<br>(11,806,<br>34,205) |

| IS<br>O     | Total number<br>of stillbirths | Method                     | Fraction of stillbirths attributable to $PM_{2.5} > C_0 \mu\text{g}/\text{m}^3$ |                            |                            |                            |                            | Number of stillbirths attributable to $PM_{2.5} > C_0 \mu\text{g}/\text{m}^3$ |                               |                               |                              |                              |
|-------------|--------------------------------|----------------------------|---------------------------------------------------------------------------------|----------------------------|----------------------------|----------------------------|----------------------------|-------------------------------------------------------------------------------|-------------------------------|-------------------------------|------------------------------|------------------------------|
|             |                                |                            | $C_0 = 5$                                                                       | $C_0 = 10$                 | $C_0 = 15$                 | $C_0 = 25$                 | $C_0 = 35$                 | $C_0 = 5$                                                                     | $C_0 = 10$                    | $C_0 = 15$                    | $C_0 = 25$                   | $C_0 = 35$                   |
| B<br>G<br>D | 82,980<br>(72,235,<br>92,339)  | Xie et<br>al. 2021         | 58.93<br>(33.38,<br>75.94)                                                      | 55.94<br>(28.48,<br>74.18) | 52.71<br>(23.21,<br>72.28) | 45.46<br>(12.46,<br>68.02) | 37.14<br>(5.13,<br>63.05)  | 48,902<br>(26,428,<br>64,087)                                                 | 46,418<br>(22,540,<br>62,330) | 43,739<br>(18,330,<br>60,453) | 37,726<br>(9,855,<br>56,821) | 30,820<br>(4,060,<br>52,875) |
| B<br>H<br>R | 127 (117, 137)                 | Age-<br>specific<br>curves | 61.50<br>(41.98,<br>73.95)                                                      | 57.44<br>(39.26,<br>69.85) | 52.93<br>(36.86,<br>65.21) | 42.54<br>(30.67,<br>52.69) | 30.34<br>(19.68,<br>38.45) | 78 (53, 95)                                                                   | 73 (50, 90)                   | 67 (46, 83)                   | 54 (37, 68)                  | 39 (26, 49)                  |
| B<br>H<br>R | 127 (117, 137)                 | All-ages<br>curve          | 58.23<br>(36.22,<br>71.48)                                                      | 53.94<br>(29.27,<br>68.41) | 49.16<br>(21.62,<br>64.99) | 38.23<br>(8.37,<br>57.15)  | 26.15<br>(2.43,<br>48.38)  | 74 (46, 91)                                                                   | 68 (37, 87)                   | 62 (27, 83)                   | 49 (11, 73)                  | 33 (3, 62)                   |
| B<br>H<br>R | 127 (117, 137)                 | Zhang et<br>al. 2021       | 39.63<br>(29.93,<br>47.44)                                                      | 36.61<br>(26.46,<br>44.85) | 33.45<br>(22.81,<br>42.14) | 26.62<br>(14.94,<br>36.31) | 19.08<br>(6.62,<br>29.93)  | 50 (37, 62)                                                                   | 46 (33, 58)                   | 42 (29, 55)                   | 34 (19, 47)                  | 24 (9, 38)                   |
| B<br>H<br>R | 127 (117, 137)                 | Xie et<br>al. 2021         | 51.16<br>(27.36,<br>68.79)                                                      | 47.52<br>(22.08,<br>66.50) | 43.59<br>(16.39,<br>64.02) | 34.73<br>(5.84,<br>58.45)  | 24.69<br>(1.52,<br>51.94)  | 65 (35, 89)                                                                   | 60 (28, 86)                   | 55 (21, 82)                   | 44 (7, 74)                   | 31 (2, 66)                   |
| B<br>H<br>S | 65 (59, 72)                    | Age-<br>specific<br>curves | 1.34<br>(0.67,<br>2.14)                                                         | 0.00<br>(0.00,<br>0.11)    | 0.00<br>(0.00,<br>0.23)    | 0.00<br>(0.00,<br>0.29)    | 0.00<br>(0.00,<br>0.00)    | 1 (0, 1)                                                                      | 0 (0, 0)                      | 0 (0, 0)                      | 0 (0, 0)                     | 0 (0, 0)                     |
| B<br>H<br>S | 65 (59, 72)                    | All-ages<br>curve          | 2.33<br>(0.02,<br>6.94)                                                         | 0.02<br>(0.00,<br>1.24)    | 0.00<br>(0.00,<br>0.40)    | 0.00<br>(0.00,<br>0.04)    | 0.00<br>(0.00,<br>0.00)    | 2 (0, 5)                                                                      | 0 (0, 1)                      | 0 (0, 0)                      | 0 (0, 0)                     | 0 (0, 0)                     |
| B<br>H<br>S | 65 (59, 72)                    | Zhang et<br>al. 2021       | 1.04<br>(0.05,<br>2.08)                                                         | 0.00<br>(0.00,<br>0.03)    | 0.00<br>(0.00,<br>0.00)    | 0.00<br>(0.00,<br>0.00)    | 0.00<br>(0.00,<br>0.00)    | 1 (0, 1)                                                                      | 0 (0, 0)                      | 0 (0, 0)                      | 0 (0, 0)                     | 0 (0, 0)                     |
| B<br>H<br>S | 65 (59, 72)                    | Xie et<br>al. 2021         | 1.51<br>(0.02,<br>5.02)                                                         | 0.03<br>(0.00,<br>1.01)    | 0.00<br>(0.00,<br>0.38)    | 0.00<br>(0.00,<br>0.13)    | 0.00<br>(0.00,<br>0.02)    | 1 (0, 3)                                                                      | 0 (0, 1)                      | 0 (0, 0)                      | 0 (0, 0)                     | 0 (0, 0)                     |
| B<br>L<br>Z | 62 (56, 68)                    | Age-<br>specific<br>curves | 22.19<br>(11.40,<br>32.74)                                                      | 13.78<br>(6.95,<br>20.83)  | 4.95<br>(2.47,<br>7.63)    | 0.00<br>(0.00,<br>0.01)    | 0.00<br>(0.00,<br>0.00)    | 14 (7, 21)                                                                    | 9 (4, 13)                     | 3 (2, 5)                      | 0 (0, 0)                     | 0 (0, 0)                     |
| B<br>L<br>Z | 62 (56, 68)                    | All-ages<br>curve          | 21.65<br>(7.42,<br>34.21)                                                       | 13.31<br>(1.28,<br>27.42)  | 5.90<br>(0.18,<br>20.18)   | 0.76<br>(0.00,<br>7.64)    | 0.07<br>(0.00,<br>2.52)    | 13 (5, 22)                                                                    | 8 (1, 18)                     | 4 (0, 13)                     | 0 (0, 5)                     | 0 (0, 2)                     |
| B<br>L<br>Z | 62 (56, 68)                    | Zhang et<br>al. 2021       | 11.38<br>(7.29,<br>15.07)                                                       | 6.97<br>(2.79,<br>10.88)   | 2.67<br>(0.27,<br>6.57)    | 0.04<br>(0.00,<br>0.69)    | 0.00<br>(0.00,<br>0.02)    | 7 (4, 10)                                                                     | 4 (2, 7)                      | 2 (0, 4)                      | 0 (0, 0)                     | 0 (0, 0)                     |

| IS<br>O     | Total number<br>of stillbirths | Method              | Fraction of stillbirths attributable to $PM_{2.5} > C_0 \mu g/m^3$ |                         |                         |                       |                       | Number of stillbirths attributable to $PM_{2.5} > C_0 \mu g/m^3$ |                      |                   |                 |             |
|-------------|--------------------------------|---------------------|--------------------------------------------------------------------|-------------------------|-------------------------|-----------------------|-----------------------|------------------------------------------------------------------|----------------------|-------------------|-----------------|-------------|
|             |                                |                     | $C_0 = 5$                                                          | $C_0 = 10$              | $C_0 = 15$              | $C_0 = 25$            | $C_0 = 35$            | $C_0 = 5$                                                        | $C_0 = 10$           | $C_0 = 15$        | $C_0 = 25$      | $C_0 = 35$  |
| B<br>L<br>Z | 62 (56, 68)                    | Xie et al. 2021     | 15.65<br>(4.73, 26.43)                                             | 9.44<br>(0.72, 21.00)   | 4.26<br>(0.07, 15.28)   | 0.47<br>(0.01, 5.67)  | 0.24<br>(0.00, 1.78)  | 10 (3, 17)                                                       | 6 (0, 13)            | 3 (0, 10)         | 0 (0, 4)        | 0 (0, 1)    |
| B<br>O<br>L | 2,525 (1,822, 3,212)           | Age-specific curves | 36.11<br>(20.05, 50.56)                                            | 29.19<br>(16.11, 41.63) | 21.53<br>(11.80, 31.08) | 6.92<br>(3.89, 9.92)  | 0.40<br>(0.25, 0.57)  | 912 (420, 1,381)                                                 | 737 (337, 1,138)     | 544 (249, 850)    | 175 (87, 275)   | 10 (5, 16)  |
| B<br>O<br>L | 2,525 (1,822, 3,212)           | All-ages curve      | 35.06<br>(17.33, 49.89)                                            | 28.10<br>(9.16, 44.50)  | 20.59<br>(3.83, 38.56)  | 8.12<br>(0.50, 25.67) | 2.22<br>(0.08, 15.01) | 885 (360, 1,425)                                                 | 710 (204, 1,267)     | 520 (85, 1,079)   | 205 (13, 734)   | 56 (2, 426) |
| B<br>O<br>L | 2,525 (1,822, 3,212)           | Zhang et al. 2021   | 19.68<br>(13.68, 24.86)                                            | 15.70<br>(9.40, 21.16)  | 11.53<br>(5.23, 17.27)  | 4.18<br>(0.61, 9.31)  | 0.82<br>(0.01, 3.47)  | 497 (301, 690)                                                   | 396 (208, 575)       | 291 (118, 463)    | 106 (14, 250)   | 21 (0, 93)  |
| B<br>O<br>L | 2,525 (1,822, 3,212)           | Xie et al. 2021     | 26.66<br>(11.20, 40.75)                                            | 21.30<br>(5.39, 36.39)  | 15.64<br>(1.88, 31.68)  | 6.28<br>(0.25, 21.56) | 1.96<br>(0.08, 12.49) | 673 (213, 1,141)                                                 | 538 (103, 1,005)     | 395 (40, 858)     | 158 (6, 554)    | 49 (2, 314) |
| B<br>R<br>A | 24,389<br>(22,345, 26,404)     | Age-specific curves | 17.15<br>(8.60, 25.92)                                             | 8.88<br>(4.47, 13.56)   | 3.63<br>(1.94, 5.52)    | 0.55<br>(0.34, 0.85)  | 0.02<br>(0.01, 0.02)  | 4,182 (2,048, 6,369)                                             | 2,165 (1,060, 3,329) | 886 (450, 1,355)  | 134 (84, 205)   | 4 (2, 6)    |
| B<br>R<br>A | 24,389<br>(22,345, 26,404)     | All-ages curve      | 17.03<br>(5.29, 27.98)                                             | 9.51<br>(1.35, 20.54)   | 4.45<br>(0.37, 13.54)   | 1.08<br>(0.05, 5.26)  | 0.32<br>(0.00, 2.24)  | 4,154 (1,303, 6,906)                                             | 2,320 (332, 5,048)   | 1,084 (90, 3,392) | 264 (11, 1,289) | 77 (1, 532) |
| B<br>R<br>A | 24,389<br>(22,345, 26,404)     | Zhang et al. 2021   | 8.98<br>(5.46, 12.13)                                              | 4.78<br>(1.94, 7.85)    | 2.11<br>(0.56, 4.31)    | 0.37<br>(0.04, 1.03)  | 0.05<br>(0.00, 0.28)  | 2,190 (1,280, 2,977)                                             | 1,165 (455, 1,940)   | 515 (134, 1,081)  | 90 (9, 263)     | 12 (0, 69)  |
| B<br>R<br>A | 24,389<br>(22,345, 26,404)     | Xie et al. 2021     | 12.45<br>(3.43, 21.69)                                             | 6.79<br>(0.80, 16.01)   | 3.32<br>(0.21, 10.86)   | 0.72<br>(0.03, 4.45)  | 0.27<br>(0.01, 1.77)  | 3,036 (797, 5,134)                                               | 1,655 (189, 3,800)   | 811 (52, 2,597)   | 175 (7, 1,038)  | 65 (1, 412) |
| B<br>R<br>B | 25 (15, 36)                    | Age-specific curves | 20.32<br>(10.48, 30.63)                                            | 11.72<br>(5.93, 18.15)  | 2.45<br>(1.23, 3.88)    | 0.00<br>(0.00, 0.01)  | 0.00<br>(0.00, 0.00)  | 5 (2, 8)                                                         | 3 (1, 5)             | 1 (0, 1)          | 0 (0, 0)        | 0 (0, 0)    |
| B<br>R<br>B | 25 (15, 36)                    | All-ages curve      | 19.67<br>(6.04, 32.42)                                             | 10.97<br>(0.61, 25.54)  | 3.72<br>(0.04, 17.75)   | 0.30<br>(0.00, 5.26)  | 0.00<br>(0.00, 1.36)  | 5 (1, 10)                                                        | 3 (0, 8)             | 1 (0, 5)          | 0 (0, 1)        | 0 (0, 0)    |
| B<br>R<br>B | 25 (15, 36)                    | Zhang et al. 2021   | 10.34<br>(6.46, 13.81)                                             | 5.88<br>(1.92, 9.59)    | 1.66<br>(0.06, 5.18)    | 0.00<br>(0.00, 0.25)  | 0.00<br>(0.00, 0.00)  | 3 (1, 4)                                                         | 1 (0, 3)             | 0 (0, 1)          | 0 (0, 0)        | 0 (0, 0)    |

| IS<br>O     | Total number<br>of stillbirths | Method              | Fraction of stillbirths attributable to $PM_{2.5} > C_0 \mu g/m^3$ |                            |                            |                           |                          | Number of stillbirths attributable to $PM_{2.5} > C_0 \mu g/m^3$ |                  |             |            |            |
|-------------|--------------------------------|---------------------|--------------------------------------------------------------------|----------------------------|----------------------------|---------------------------|--------------------------|------------------------------------------------------------------|------------------|-------------|------------|------------|
|             |                                |                     | $C_0 = 5$                                                          | $C_0 = 10$                 | $C_0 = 15$                 | $C_0 = 25$                | $C_0 = 35$               | $C_0 = 5$                                                        | $C_0 = 10$       | $C_0 = 15$  | $C_0 = 25$ | $C_0 = 35$ |
| B<br>R<br>B | 25 (15, 36)                    | Xie et al. 2021     | 14.59<br>(3.96,<br>24.72)                                          | 8.64<br>(0.40,<br>19.33)   | 3.74<br>(0.04,<br>13.52)   | 0.24<br>(0.00,<br>4.07)   | 0.11<br>(0.00,<br>1.12)  | 4 (1, 7)                                                         | 2 (0, 5)         | 1 (0, 4)    | 0 (0, 1)   | 0 (0, 0)   |
| B<br>R<br>N | 30 (26, 34)                    | Age-specific curves | 14.01<br>(6.98,<br>22.18)                                          | 4.71<br>(2.30,<br>7.69)    | 0.00<br>(0.00,<br>0.07)    | 0.00<br>(0.00,<br>0.06)   | 0.00<br>(0.00,<br>0.00)  | 4 (2, 7)                                                         | 1 (1, 2)         | 0 (0, 0)    | 0 (0, 0)   | 0 (0, 0)   |
| B<br>R<br>N | 30 (26, 34)                    | All-ages curve      | 13.59<br>(2.81,<br>24.19)                                          | 5.07<br>(0.10,<br>16.66)   | 1.18<br>(0.00,<br>8.87)    | 0.07<br>(0.00,<br>1.84)   | 0.00<br>(0.00,<br>0.84)  | 4 (1, 7)                                                         | 2 (0, 5)         | 0 (0, 3)    | 0 (0, 1)   | 0 (0, 0)   |
| B<br>R<br>N | 30 (26, 34)                    | Zhang et al. 2021   | 7.21<br>(3.91,<br>9.75)                                            | 2.89<br>(0.21,<br>5.28)    | 0.32<br>(0.00,<br>1.22)    | 0.00<br>(0.00,<br>0.00)   | 0.00<br>(0.00,<br>0.00)  | 2 (1, 3)                                                         | 1 (0, 2)         | 0 (0, 0)    | 0 (0, 0)   | 0 (0, 0)   |
| B<br>R<br>N | 30 (26, 34)                    | Xie et al. 2021     | 9.96<br>(1.86,<br>18.26)                                           | 3.94<br>(0.04,<br>12.64)   | 0.69<br>(0.00,<br>6.82)    | 0.08<br>(0.00,<br>1.42)   | 0.00<br>(0.00,<br>0.67)  | 3 (1, 5)                                                         | 1 (0, 4)         | 0 (0, 2)    | 0 (0, 0)   | 0 (0, 0)   |
| B<br>T<br>N | 135 (113, 157)                 | Age-specific curves | 36.13<br>(21.08,<br>49.32)                                         | 29.23<br>(17.06,<br>40.35) | 21.65<br>(12.66,<br>30.07) | 9.36<br>(6.00,<br>12.67)  | 3.49<br>(2.25,<br>4.56)  | 49 (26, 68)                                                      | 39 (22, 56)      | 29 (16, 41) | 13 (8, 17) | 5 (3, 7)   |
| B<br>T<br>N | 135 (113, 157)                 | All-ages curve      | 35.32<br>(18.37,<br>49.84)                                         | 28.51<br>(10.70,<br>44.48) | 21.45<br>(5.54,<br>38.53)  | 10.62<br>(1.24,<br>26.47) | 5.07<br>(0.28,<br>16.92) | 48 (23, 70)                                                      | 38 (14, 62)      | 29 (7, 53)  | 14 (2, 36) | 7 (0, 23)  |
| B<br>T<br>N | 135 (113, 157)                 | Zhang et al. 2021   | 20.43<br>(14.33,<br>25.60)                                         | 16.52<br>(10.11,<br>21.93) | 12.48<br>(6.30,<br>18.08)  | 6.04<br>(2.11,<br>10.75)  | 2.74<br>(0.64,<br>5.82)  | 28 (18, 36)                                                      | 22 (13, 31)      | 17 (8, 25)  | 8 (3, 14)  | 4 (1, 8)   |
| B<br>T<br>N | 135 (113, 157)                 | Xie et al. 2021     | 27.48<br>(11.78,<br>41.31)                                         | 22.25<br>(6.29,<br>37.00)  | 16.95<br>(3.16,<br>32.37)  | 8.99<br>(0.80,<br>22.80)  | 4.66<br>(0.24,<br>14.98) | 37 (15, 58)                                                      | 30 (8, 51)       | 23 (4, 44)  | 12 (1, 31) | 6 (0, 20)  |
| B<br>W<br>A | 902 (833, 982)                 | Age-specific curves | 22.71<br>(11.75,<br>33.58)                                         | 14.37<br>(7.34,<br>21.73)  | 5.30<br>(2.75,<br>8.09)    | 0.29<br>(0.17,<br>0.44)   | 0.00<br>(0.00,<br>0.00)  | 205 (108,<br>303)                                                | 130 (67,<br>196) | 48 (25, 73) | 3 (2, 4)   | 0 (0, 0)   |
| B<br>W<br>A | 902 (833, 982)                 | All-ages curve      | 21.83<br>(8.05,<br>34.75)                                          | 13.25<br>(1.86,<br>28.02)  | 6.21<br>(0.40,<br>20.67)   | 1.06<br>(0.03,<br>8.49)   | 0.22<br>(0.00,<br>2.89)  | 197 (71,<br>323)                                                 | 120 (16,<br>260) | 56 (4, 190) | 10 (0, 80) | 2 (0, 27)  |
| B<br>W<br>A | 902 (833, 982)                 | Zhang et al. 2021   | 11.73<br>(7.52,<br>15.53)                                          | 7.37<br>(3.04,<br>11.37)   | 3.10<br>(0.66,<br>6.94)    | 0.26<br>(0.01,<br>1.23)   | 0.02<br>(0.00,<br>0.15)  | 106 (67,<br>139)                                                 | 66 (28, 101)     | 28 (6, 62)  | 2 (0, 11)  | 0 (0, 1)   |

| IS<br>O     | Total number<br>of stillbirths   | Method                 | Fraction of stillbirths attributable to $PM_{2.5} > C_0 \mu\text{g}/\text{m}^3$ |                            |                            |                            |                            | Number of stillbirths attributable to $PM_{2.5} > C_0 \mu\text{g}/\text{m}^3$ |                               |                               |                               |                               |
|-------------|----------------------------------|------------------------|---------------------------------------------------------------------------------|----------------------------|----------------------------|----------------------------|----------------------------|-------------------------------------------------------------------------------|-------------------------------|-------------------------------|-------------------------------|-------------------------------|
|             |                                  |                        | $C_0 = 5$                                                                       | $C_0 = 10$                 | $C_0 = 15$                 | $C_0 = 25$                 | $C_0 = 35$                 | $C_0 = 5$                                                                     | $C_0 = 10$                    | $C_0 = 15$                    | $C_0 = 25$                    | $C_0 = 35$                    |
| B<br>W<br>A | 902 (833, 982)                   | Xie et al. 2021        | 16.10<br>(5.01,<br>26.95)                                                       | 9.94<br>(1.06,<br>21.51)   | 4.94<br>(0.18,<br>15.79)   | 0.96<br>(0.03,<br>6.41)    | 0.39<br>(0.01,<br>2.29)    | 145 (45,<br>242)                                                              | 90 (10, 194)                  | 45 (2, 143)                   | 9 (0, 58)                     | 4 (0, 21)                     |
| C<br>A<br>F | 5,374 (3,216,<br>7,599)          | Age-specific<br>curves | 44.62<br>(25.85,<br>59.95)                                                      | 38.66<br>(22.12,<br>52.79) | 32.05<br>(18.26,<br>44.35) | 16.88<br>(10.07,<br>23.72) | 2.35<br>(1.54,<br>3.28)    | 2,398 (1,160,<br>3,711)                                                       | 2,078 (1,006,<br>3,222)       | 1,722 (843,<br>2,683)         | 907 (463,<br>1,418)           | 126 (69,<br>200)              |
| C<br>A<br>F | 5,374 (3,216,<br>7,599)          | All-ages<br>curve      | 43.53<br>(24.08,<br>59.65)                                                      | 37.53<br>(15.76,<br>55.37) | 30.85<br>(7.70,<br>50.60)  | 16.44<br>(1.15,<br>39.65)  | 6.52<br>(0.19,<br>27.74)   | 2,339 (1,018,<br>3,828)                                                       | 2,017 (682,<br>3,470)         | 1,658 (370,<br>3,123)         | 883 (58,<br>2,321)            | 350 (11,<br>1,533)            |
| C<br>A<br>F | 5,374 (3,216,<br>7,599)          | Zhang et al. 2021      | 25.44<br>(18.22,<br>31.52)                                                      | 21.77<br>(14.17,<br>28.14) | 17.92<br>(9.93,<br>24.58)  | 9.63<br>(2.07,<br>16.92)   | 2.37<br>(0.09,<br>8.71)    | 1,367 (785,<br>2,091)                                                         | 1,170 (621,<br>1,853)         | 963 (449,<br>1,583)           | 518 (94,<br>1,074)            | 127 (4, 488)                  |
| C<br>A<br>F | 5,374 (3,216,<br>7,599)          | Xie et al. 2021        | 34.10<br>(15.67,<br>49.99)                                                      | 29.32<br>(9.54,<br>46.34)  | 24.16<br>(4.11,<br>42.40)  | 13.10<br>(0.54,<br>33.56)  | 5.52<br>(0.14,<br>23.42)   | 1,833 (743,<br>3,176)                                                         | 1,576 (490,<br>2,955)         | 1,298 (229,<br>2,631)         | 704 (29,<br>2,090)            | 297 (8,<br>1,361)             |
| C<br>H<br>L | 776 (744, 806)                   | Age-specific<br>curves | 30.06<br>(16.16,<br>43.32)                                                      | 22.55<br>(12.01,<br>33.14) | 14.62<br>(7.84,<br>21.77)  | 2.69<br>(1.50,<br>4.02)    | 0.05<br>(0.03,<br>0.07)    | 233 (126,<br>334)                                                             | 175 (93,<br>255)              | 113 (61,<br>167)              | 21 (12, 31)                   | 0 (0, 1)                      |
| C<br>H<br>L | 776 (744, 806)                   | All-ages<br>curve      | 29.57<br>(13.00,<br>43.26)                                                      | 22.33<br>(5.33,<br>37.29)  | 15.18<br>(1.58,<br>30.75)  | 5.37<br>(0.16,<br>18.13)   | 1.78<br>(0.02,<br>8.97)    | 229 (101,<br>340)                                                             | 173 (42,<br>294)              | 118 (12,<br>242)              | 42 (1, 142)                   | 14 (0, 69)                    |
| C<br>H<br>L | 776 (744, 806)                   | Zhang et al. 2021      | 16.07<br>(10.87,<br>20.57)                                                      | 11.92<br>(6.53,<br>16.60)  | 7.85<br>(2.98,<br>12.52)   | 1.81<br>(0.13,<br>5.43)    | 0.11<br>(0.00,<br>1.24)    | 125 (83,<br>161)                                                              | 92 (50, 131)                  | 61 (23, 99)                   | 14 (1, 43)                    | 1 (0, 10)                     |
| C<br>H<br>L | 776 (744, 806)                   | Xie et al. 2021        | 21.80<br>(8.32,<br>34.58)                                                       | 15.98<br>(2.93,<br>29.72)  | 10.53<br>(0.70,<br>24.50)  | 3.29<br>(0.10,<br>14.58)   | 0.95<br>(0.04,<br>7.37)    | 169 (63,<br>268)                                                              | 124 (22,<br>231)              | 82 (5, 191)                   | 25 (1, 114)                   | 7 (0, 56)                     |
| C<br>H<br>N | 130,583<br>(127,001,<br>134,144) | Age-specific<br>curves | 53.85<br>(35.31,<br>67.14)                                                      | 48.88<br>(32.79,<br>61.38) | 43.38<br>(29.16,<br>54.58) | 31.04<br>(22.04,<br>39.31) | 19.00<br>(11.89,<br>24.81) | 70,314<br>(46,070,<br>87,987)                                                 | 63,830<br>(42,315,<br>80,717) | 56,648<br>(37,606,<br>71,794) | 40,533<br>(28,461,<br>51,434) | 24,810<br>(15,419,<br>32,548) |
| C<br>H<br>N | 130,583<br>(127,001,<br>134,144) | All-ages<br>curve      | 52.41<br>(31.90,<br>66.02)                                                      | 47.31<br>(24.72,<br>62.41) | 41.66<br>(17.57,<br>58.41) | 29.47<br>(7.44,<br>49.28)  | 18.88<br>(2.78,<br>39.40)  | 68,438<br>(41,127,<br>86,537)                                                 | 61,781<br>(31,870,<br>81,662) | 54,395<br>(22,654,<br>76,478) | 38,488<br>(9,550,<br>64,219)  | 24,651<br>(3,611,<br>51,306)  |
| C<br>H<br>N | 130,583<br>(127,001,<br>134,144) | Zhang et al. 2021      | 35.36<br>(26.55,<br>42.46)                                                      | 32.18<br>(22.94,<br>39.62) | 28.85<br>(19.17,<br>36.65) | 21.82<br>(11.85,<br>30.29) | 15.16<br>(6.47,<br>23.62)  | 46,179<br>(34,354,<br>55,761)                                                 | 42,025<br>(29,717,<br>52,061) | 37,668<br>(24,807,<br>48,154) | 28,488<br>(15,335,<br>39,692) | 19,802<br>(8,378,<br>30,973)  |

| IS<br>O     | Total number<br>of stillbirths   | Method                     | Fraction of stillbirths attributable to $PM_{2.5} > C_0 \mu g/m^3$ |                            |                            |                            |                            | Number of stillbirths attributable to $PM_{2.5} > C_0 \mu g/m^3$ |                               |                               |                               |                              |
|-------------|----------------------------------|----------------------------|--------------------------------------------------------------------|----------------------------|----------------------------|----------------------------|----------------------------|------------------------------------------------------------------|-------------------------------|-------------------------------|-------------------------------|------------------------------|
|             |                                  |                            | $C_0 = 5$                                                          | $C_0 = 10$                 | $C_0 = 15$                 | $C_0 = 25$                 | $C_0 = 35$                 | $C_0 = 5$                                                        | $C_0 = 10$                    | $C_0 = 15$                    | $C_0 = 25$                    | $C_0 = 35$                   |
| CHN         | 130,583<br>(127,001,<br>134,144) | Xie et<br>al. 2021         | 45.72<br>(23.98,<br>62.17)                                         | 41.77<br>(18.52,<br>59.41) | 37.51<br>(13.29,<br>56.44) | 28.46<br>(5.96,<br>49.81)  | 20.19<br>(2.51,<br>42.41)  | 59,705<br>(31,295,<br>80,600)                                    | 54,539<br>(24,171,<br>76,986) | 48,987<br>(17,344,<br>73,091) | 37,164<br>(7,776,<br>64,391)  | 26,367<br>(3,271,<br>54,705) |
| CI<br>V     | 21,547<br>(12,883,<br>31,098)    | Age-<br>specific<br>curves | 35.71<br>(19.84,<br>50.08)                                         | 28.74<br>(15.83,<br>41.20) | 21.00<br>(11.43,<br>30.76) | 3.72<br>(2.08,<br>5.51)    | 0.02<br>(0.01,<br>0.03)    | 7,695 (3,398,<br>12,771)                                         | 6,193 (2,726,<br>10,467)      | 4,525 (1,983,<br>7,775)       | 801 (348,<br>1,379)           | 5 (2, 8)                     |
| CI<br>V     | 21,547<br>(12,883,<br>31,098)    | All-ages<br>curve          | 34.55<br>(16.79,<br>49.74)                                         | 27.40<br>(8.01,<br>44.49)  | 19.45<br>(2.60,<br>38.67)  | 5.51<br>(0.28,<br>25.42)   | 1.04<br>(0.02,<br>13.65)   | 7,444 (2,666,<br>12,739)                                         | 5,904 (1,505,<br>11,332)      | 4,192 (537,<br>9,826)         | 1,188 (53,<br>5,770)          | 223 (4,<br>2,824)            |
| CI<br>V     | 21,547<br>(12,883,<br>31,098)    | Zhang et<br>al. 2021       | 19.22<br>(13.30,<br>24.33)                                         | 15.22<br>(9.00,<br>20.58)  | 11.02<br>(4.49,<br>16.64)  | 2.99<br>(0.16,<br>8.22)    | 0.31<br>(0.00,<br>1.79)    | 4,142 (2,000,<br>6,434)                                          | 3,280 (1,389,<br>5,227)       | 2,374 (783,<br>4,046)         | 644 (30,<br>1,888)            | 66 (0, 362)                  |
| CI<br>V     | 21,547<br>(12,883,<br>31,098)    | Xie et<br>al. 2021         | 25.88<br>(10.82,<br>40.19)                                         | 20.20<br>(4.68,<br>35.74)  | 14.05<br>(1.27,<br>30.94)  | 4.42<br>(0.12,<br>20.18)   | 1.36<br>(0.04,<br>10.37)   | 5,577 (1,960,<br>10,731)                                         | 4,352 (1,004,<br>9,347)       | 3,027 (264,<br>7,970)         | 953 (24,<br>5,036)            | 293 (7,<br>2,463)            |
| C<br>M<br>R | 18,096<br>(10,512,<br>26,364)    | Age-<br>specific<br>curves | 58.74<br>(42.38,<br>71.44)                                         | 54.33<br>(39.23,<br>66.66) | 49.44<br>(35.72,<br>60.74) | 38.25<br>(27.38,<br>47.34) | 25.67<br>(16.49,<br>33.18) | 10,630<br>(5,691,<br>16,068)                                     | 9,832 (5,336,<br>14,914)      | 8,947 (5,009,<br>13,504)      | 6,922<br>(4,025,<br>10,417)   | 4,645<br>(2,598,<br>7,296)   |
| C<br>M<br>R | 18,096<br>(10,512,<br>26,364)    | All-ages<br>curve          | 57.11<br>(36.21,<br>70.44)                                         | 52.50<br>(29.35,<br>67.27) | 47.35<br>(22.28,<br>63.74) | 35.62<br>(9.92,<br>55.64)  | 24.07<br>(4.17,<br>46.51)  | 10,335<br>(5,111,<br>15,297)                                     | 9,500 (4,491,<br>14,442)      | 8,568 (3,484,<br>13,393)      | 6,447<br>(1,531,<br>11,345)   | 4,355 (590,<br>9,623)        |
| C<br>M<br>R | 18,096<br>(10,512,<br>26,364)    | Zhang et<br>al. 2021       | 40.07<br>(30.48,<br>47.68)                                         | 37.11<br>(27.05,<br>45.09) | 34.00<br>(23.45,<br>42.38) | 27.29<br>(15.82,<br>36.52) | 20.13<br>(9.10,<br>30.07)  | 7,251 (3,891,<br>10,294)                                         | 6,715 (3,609,<br>9,626)       | 6,152 (3,192,<br>8,900)       | 4,939<br>(2,221,<br>7,517)    | 3,643<br>(1,408,<br>5,913)   |
| C<br>M<br>R | 18,096<br>(10,512,<br>26,364)    | Xie et<br>al. 2021         | 51.35<br>(27.89,<br>68.25)                                         | 47.81<br>(22.64,<br>65.93) | 43.98<br>(17.12,<br>63.42) | 35.44<br>(8.14,<br>57.79)  | 26.66<br>(3.49,<br>51.25)  | 9,293 (3,882,<br>15,085)                                         | 8,651 (3,119,<br>14,409)      | 7,959 (2,462,<br>13,651)      | 6,414<br>(1,251,<br>12,123)   | 4,825 (533,<br>10,263)       |
| C<br>O<br>D | 95,939<br>(80,216,<br>111,260)   | Age-<br>specific<br>curves | 48.65<br>(29.04,<br>63.61)                                         | 43.11<br>(25.57,<br>57.08) | 36.96<br>(21.91,<br>49.41) | 22.84<br>(14.48,<br>30.83) | 8.86<br>(5.94,<br>11.70)   | 46,678<br>(27,302,<br>62,092)                                    | 41,360<br>(24,226,<br>55,524) | 35,458<br>(21,138,<br>48,000) | 21,909<br>(13,449,<br>29,873) | 8,502<br>(5,437,<br>11,267)  |
| C<br>O<br>D | 95,939<br>(80,216,<br>111,260)   | All-ages<br>curve          | 47.06<br>(27.37,<br>63.27)                                         | 41.41<br>(19.64,<br>59.33) | 35.13<br>(11.56,<br>54.95) | 21.41<br>(2.43,<br>44.89)  | 10.27<br>(0.51,<br>33.91)  | 45,147<br>(24,889,<br>64,003)                                    | 39,733<br>(18,124,<br>58,787) | 33,706<br>(10,684,<br>53,268) | 20,544<br>(2,229,<br>42,586)  | 9,854 (465,<br>30,591)       |
| C<br>O<br>D | 95,939<br>(80,216,<br>111,260)   | Zhang et<br>al. 2021       | 28.50<br>(20.73,<br>35.01)                                         | 24.95<br>(16.81,<br>31.81) | 21.22<br>(12.70,<br>28.44) | 13.24<br>(4.74,<br>21.18)  | 5.83<br>(0.71,<br>13.49)   | 27,338<br>(18,681,<br>34,490)                                    | 23,934<br>(15,082,<br>30,771) | 20,357<br>(11,182,<br>27,272) | 12,700<br>(4,269,<br>20,279)  | 5,594 (695,<br>12,825)       |

| IS<br>O     | Total number<br>of stillbirths | Method                     | Fraction of stillbirths attributable to $PM_{2.5} > C_0 \mu g/m^3$ |                            |                            |                            |                          | Number of stillbirths attributable to $PM_{2.5} > C_0 \mu g/m^3$ |                               |                              |                              |                        |
|-------------|--------------------------------|----------------------------|--------------------------------------------------------------------|----------------------------|----------------------------|----------------------------|--------------------------|------------------------------------------------------------------|-------------------------------|------------------------------|------------------------------|------------------------|
|             |                                |                            | $C_0 = 5$                                                          | $C_0 = 10$                 | $C_0 = 15$                 | $C_0 = 25$                 | $C_0 = 35$               | $C_0 = 5$                                                        | $C_0 = 10$                    | $C_0 = 15$                   | $C_0 = 25$                   | $C_0 = 35$             |
| C<br>O<br>D | 95,939<br>(80,216,<br>111,260) | Xie et<br>al. 2021         | 37.87<br>(18.16,<br>54.27)                                         | 33.35<br>(12.22,<br>50.92) | 28.48<br>(6.67,<br>47.30)  | 18.07<br>(1.41,<br>39.19)  | 9.22<br>(0.34,<br>29.99) | 36,335<br>(16,922,<br>52,607)                                    | 31,999<br>(11,178,<br>49,004) | 27,322<br>(6,014,<br>45,420) | 17,336<br>(1,270,<br>37,628) | 8,849 (317,<br>28,026) |
| C<br>O<br>G | 2,653 (1,564,<br>3,750)        | Age-<br>specific<br>curves | 44.17<br>(26.15,<br>59.15)                                         | 38.13<br>(22.38,<br>51.74) | 31.43<br>(18.47,<br>42.96) | 17.25<br>(10.82,<br>23.59) | 6.09<br>(4.02,<br>8.28)  | 1,172 (585,<br>1,865)                                            | 1,012 (502,<br>1,624)         | 834 (415,<br>1,342)          | 458 (247,<br>738)            | 162 (90,<br>261)       |
| C<br>O<br>G | 2,653 (1,564,<br>3,750)        | All-ages<br>curve          | 42.75<br>(24.01,<br>58.47)                                         | 36.74<br>(16.13,<br>54.05) | 30.09<br>(9.04,<br>49.15)  | 16.71<br>(1.74,<br>38.13)  | 7.66<br>(0.23,<br>27.51) | 1,134 (498,<br>1,821)                                            | 975 (350,<br>1,656)           | 798 (196,<br>1,505)          | 443 (41,<br>1,078)           | 203 (6, 724)           |
| C<br>O<br>G | 2,653 (1,564,<br>3,750)        | Zhang et<br>al. 2021       | 25.21<br>(18.08,<br>31.25)                                         | 21.48<br>(14.03,<br>27.86) | 17.57<br>(9.84,<br>24.29)  | 9.78<br>(3.13,<br>16.66)   | 3.73<br>(0.24,<br>9.73)  | 669 (378,<br>997)                                                | 570 (311,<br>873)             | 466 (219,<br>748)            | 260 (79,<br>490)             | 99 (6, 273)            |
| C<br>O<br>G | 2,653 (1,564,<br>3,750)        | Xie et<br>al. 2021         | 33.63<br>(15.48,<br>49.32)                                         | 28.68<br>(9.46,<br>45.63)  | 23.34<br>(4.63,<br>41.64)  | 13.14<br>(0.76,<br>32.80)  | 5.72<br>(0.15,<br>23.69) | 892 (340,<br>1,592)                                              | 761 (226,<br>1,448)           | 619 (108,<br>1,303)          | 349 (17,<br>957)             | 152 (4, 667)           |
| C<br>O<br>L | 5,718 (4,340,<br>7,020)        | Age-<br>specific<br>curves | 24.35<br>(12.60,<br>35.87)                                         | 16.22<br>(8.26,<br>24.47)  | 7.44<br>(3.77,<br>11.43)   | 0.09<br>(0.05,<br>0.14)    | 0.00<br>(0.00,<br>0.00)  | 1,393 (733,<br>2,168)                                            | 928 (486,<br>1,475)           | 425 (222,<br>686)            | 5 (3, 9)                     | 0 (0, 0)               |
| C<br>O<br>L | 5,718 (4,340,<br>7,020)        | All-ages<br>curve          | 23.57<br>(9.12,<br>36.83)                                          | 15.13<br>(2.29,<br>30.19)  | 7.42<br>(0.41,<br>22.88)   | 1.30<br>(0.02,<br>9.85)    | 0.27<br>(0.00,<br>3.56)  | 1,348 (528,<br>2,268)                                            | 865 (138,<br>1,835)           | 424 (26,<br>1,385)           | 74 (1, 561)                  | 15 (0, 183)            |
| C<br>O<br>L | 5,718 (4,340,<br>7,020)        | Zhang et<br>al. 2021       | 12.65<br>(8.27,<br>16.62)                                          | 8.32<br>(3.80,<br>12.52)   | 3.97<br>(0.76,<br>8.19)    | 0.23<br>(0.00,<br>1.51)    | 0.01<br>(0.00,<br>0.10)  | 724 (422,<br>1,000)                                              | 476 (205,<br>734)             | 227 (41,<br>462)             | 13 (0, 79)                   | 0 (0, 6)               |
| C<br>O<br>L | 5,718 (4,340,<br>7,020)        | Xie et<br>al. 2021         | 17.41<br>(5.73,<br>28.77)                                          | 11.39<br>(1.25,<br>23.52)  | 6.02<br>(0.23,<br>17.91)   | 0.93<br>(0.03,<br>7.76)    | 0.37<br>(0.01,<br>2.82)  | 996 (319,<br>1,720)                                              | 651 (68,<br>1,376)            | 344 (13,<br>1,062)           | 53 (2, 452)                  | 21 (0, 157)            |
| C<br>O<br>M | 692 (409, 991)                 | Age-<br>specific<br>curves | 11.79<br>(6.03,<br>18.42)                                          | 2.19<br>(1.10,<br>3.53)    | 0.00<br>(0.00,<br>0.10)    | 0.00<br>(0.00,<br>0.15)    | 0.00<br>(0.00,<br>0.00)  | 82 (32, 136)                                                     | 15 (6, 26)                    | 0 (0, 1)                     | 0 (0, 1)                     | 0 (0, 0)               |
| C<br>O<br>M | 692 (409, 991)                 | All-ages<br>curve          | 11.50<br>(1.66,<br>21.17)                                          | 3.22<br>(0.03,<br>12.76)   | 0.52<br>(0.00,<br>5.97)    | 0.00<br>(0.00,<br>1.30)    | 0.00<br>(0.00,<br>0.41)  | 80 (13, 162)                                                     | 22 (0, 90)                    | 4 (0, 39)                    | 0 (0, 8)                     | 0 (0, 3)               |
| C<br>O<br>M | 692 (409, 991)                 | Zhang et<br>al. 2021       | 5.96<br>(3.05,<br>8.50)                                            | 1.50<br>(0.05,<br>4.06)    | 0.01<br>(0.00,<br>0.56)    | 0.00<br>(0.00,<br>0.00)    | 0.00<br>(0.00,<br>0.00)  | 41 (18, 70)                                                      | 10 (0, 31)                    | 0 (0, 5)                     | 0 (0, 0)                     | 0 (0, 0)               |



| IS<br>O     | Total number<br>of stillbirths | Method              | Fraction of stillbirths attributable to $PM_{2.5} > C_0 \mu g/m^3$ |                            |                           |                          |                         | Number of stillbirths attributable to $PM_{2.5} > C_0 \mu g/m^3$ |             |             |            |            |
|-------------|--------------------------------|---------------------|--------------------------------------------------------------------|----------------------------|---------------------------|--------------------------|-------------------------|------------------------------------------------------------------|-------------|-------------|------------|------------|
|             |                                |                     | $C_0 = 5$                                                          | $C_0 = 10$                 | $C_0 = 15$                | $C_0 = 25$               | $C_0 = 35$              | $C_0 = 5$                                                        | $C_0 = 10$  | $C_0 = 15$  | $C_0 = 25$ | $C_0 = 35$ |
| C<br>O<br>M | 692 (409, 991)                 | Xie et al. 2021     | 7.72<br>(0.93,<br>15.87)                                           | 1.82<br>(0.03,<br>9.97)    | 0.13<br>(0.00,<br>4.37)   | 0.04<br>(0.00,<br>0.80)  | 0.03<br>(0.00,<br>0.42) | 53 (6, 128)                                                      | 13 (0, 72)  | 1 (0, 32)   | 0 (0, 6)   | 0 (0, 3)   |
| C<br>P<br>V | 138 (83, 192)                  | Age-specific curves | 31.34<br>(16.93,<br>44.94)                                         | 23.84<br>(12.68,<br>34.97) | 15.50<br>(8.17,<br>23.16) | 1.61<br>(0.88,<br>2.38)  | 0.00<br>(0.00,<br>0.01) | 43 (19, 70)                                                      | 33 (15, 54) | 21 (10, 36) | 2 (1, 4)   | 0 (0, 0)   |
| C<br>P<br>V | 138 (83, 192)                  | All-ages curve      | 30.42<br>(13.26,<br>44.60)                                         | 23.11<br>(4.97,<br>38.77)  | 15.27<br>(1.28,<br>32.28) | 4.63<br>(0.08,<br>18.36) | 1.19<br>(0.00,<br>8.20) | 42 (14, 73)                                                      | 32 (6, 63)  | 21 (2, 51)  | 6 (0, 27)  | 2 (0, 12)  |
| C<br>P<br>V | 138 (83, 192)                  | Zhang et al. 2021   | 16.49<br>(11.18,<br>21.08)                                         | 12.35<br>(6.79,<br>17.13)  | 7.99<br>(2.58,<br>12.99)  | 1.34<br>(0.08,<br>4.81)  | 0.08<br>(0.00,<br>0.84) | 23 (12, 34)                                                      | 17 (7, 27)  | 11 (3, 20)  | 2 (0, 7)   | 0 (0, 1)   |
| C<br>P<br>V | 138 (83, 192)                  | Xie et al. 2021     | 22.60<br>(8.58,<br>35.62)                                          | 17.01<br>(2.93,<br>30.96)  | 11.20<br>(0.81,<br>25.88) | 3.35<br>(0.11,<br>15.05) | 0.78<br>(0.05,<br>6.85) | 31 (10, 55)                                                      | 23 (3, 47)  | 15 (1, 38)  | 5 (0, 21)  | 1 (0, 10)  |
| C<br>RI     | 336 (317, 356)                 | Age-specific curves | 25.76<br>(13.30,<br>37.88)                                         | 17.82<br>(9.04,<br>26.87)  | 9.06<br>(4.55,<br>13.97)  | 0.00<br>(0.00,<br>0.00)  | 0.00<br>(0.00,<br>0.00) | 87 (44, 127)                                                     | 60 (30, 90) | 30 (15, 47) | 0 (0, 0)   | 0 (0, 0)   |
| C<br>RI     | 336 (317, 356)                 | All-ages curve      | 25.29<br>(9.77,<br>38.68)                                          | 17.26<br>(2.30,<br>32.35)  | 9.15<br>(0.41,<br>25.35)  | 0.97<br>(0.00,<br>11.39) | 0.05<br>(0.00,<br>4.03) | 85 (32, 130)                                                     | 58 (8, 108) | 31 (1, 85)  | 3 (0, 37)  | 0 (0, 13)  |
| C<br>RI     | 336 (317, 356)                 | Zhang et al. 2021   | 13.50<br>(8.90,<br>17.62)                                          | 9.22<br>(4.43,<br>13.59)   | 4.79<br>(0.85,<br>9.33)   | 0.13<br>(0.00,<br>1.81)  | 0.00<br>(0.00,<br>0.11) | 45 (30, 59)                                                      | 31 (15, 46) | 16 (3, 31)  | 0 (0, 6)   | 0 (0, 0)   |
| C<br>RI     | 336 (317, 356)                 | Xie et al. 2021     | 18.58<br>(6.32,<br>30.27)                                          | 12.65<br>(1.20,<br>25.08)  | 6.91<br>(0.19,<br>19.50)  | 1.74<br>(0.01,<br>8.51)  | 0.77<br>(0.00,<br>3.08) | 62 (21, 104)                                                     | 43 (4, 86)  | 23 (1, 67)  | 6 (0, 29)  | 3 (0, 10)  |
| C<br>U<br>B | 765 (735, 798)                 | Age-specific curves | 10.71<br>(5.32,<br>16.37)                                          | 2.52<br>(1.25,<br>3.93)    | 0.00<br>(0.00,<br>0.10)   | 0.00<br>(0.00,<br>0.12)  | 0.00<br>(0.00,<br>0.00) | 82 (41, 125)                                                     | 19 (10, 30) | 0 (0, 1)    | 0 (0, 1)   | 0 (0, 0)   |
| C<br>U<br>B | 765 (735, 798)                 | All-ages curve      | 10.42<br>(1.81,<br>19.71)                                          | 3.13<br>(0.06,<br>11.41)   | 0.56<br>(0.00,<br>5.19)   | 0.00<br>(0.00,<br>0.87)  | 0.00<br>(0.00,<br>0.37) | 80 (14, 150)                                                     | 24 (0, 88)  | 4 (0, 39)   | 0 (0, 7)   | 0 (0, 3)   |
| C<br>U<br>B | 765 (735, 798)                 | Zhang et al. 2021   | 5.33<br>(2.64,<br>7.79)                                            | 1.39<br>(0.13,<br>3.38)    | 0.03<br>(0.00,<br>0.78)   | 0.00<br>(0.00,<br>0.01)  | 0.00<br>(0.00,<br>0.00) | 41 (20, 60)                                                      | 11 (1, 26)  | 0 (0, 6)    | 0 (0, 0)   | 0 (0, 0)   |

| IS<br>O     | Total number<br>of stillbirths | Method              | Fraction of stillbirths attributable to $PM_{2.5} > C_0 \mu g/m^3$ |                            |                            |                            |                           | Number of stillbirths attributable to $PM_{2.5} > C_0 \mu g/m^3$ |                   |                   |                   |              |
|-------------|--------------------------------|---------------------|--------------------------------------------------------------------|----------------------------|----------------------------|----------------------------|---------------------------|------------------------------------------------------------------|-------------------|-------------------|-------------------|--------------|
|             |                                |                     | $C_0 = 5$                                                          | $C_0 = 10$                 | $C_0 = 15$                 | $C_0 = 25$                 | $C_0 = 35$                | $C_0 = 5$                                                        | $C_0 = 10$        | $C_0 = 15$        | $C_0 = 25$        | $C_0 = 35$   |
| C<br>U<br>B | 765 (735, 798)                 | Xie et al. 2021     | 7.46<br>(1.05,<br>14.67)                                           | 2.36<br>(0.10,<br>8.57)    | 0.50<br>(0.00,<br>3.91)    | 0.13<br>(0.00,<br>0.71)    | 0.06<br>(0.00,<br>0.30)   | 57 (8, 112)                                                      | 18 (1, 65)        | 4 (0, 30)         | 1 (0, 5)          | 0 (0, 2)     |
| C<br>Y<br>P | 36 (31, 41)                    | Age-specific curves | 23.32<br>(10.85,<br>36.10)                                         | 15.30<br>(7.04,<br>24.39)  | 6.39<br>(2.94,<br>10.45)   | 0.00<br>(0.00,<br>0.00)    | 0.00<br>(0.00,<br>0.00)   | 8 (4, 13)                                                        | 6 (2, 9)          | 2 (1, 4)          | 0 (0, 0)          | 0 (0, 0)     |
| C<br>Y<br>P | 36 (31, 41)                    | All-ages curve      | 23.86<br>(8.28,<br>36.44)                                          | 16.37<br>(1.67,<br>29.97)  | 8.62<br>(0.24,<br>22.72)   | 1.69<br>(0.00,<br>9.01)    | 0.86<br>(0.00,<br>3.14)   | 9 (3, 13)                                                        | 6 (1, 11)         | 3 (0, 8)          | 1 (0, 3)          | 0 (0, 1)     |
| C<br>Y<br>P | 36 (31, 41)                    | Zhang et al. 2021   | 12.33<br>(7.93,<br>16.18)                                          | 8.02<br>(3.36,<br>12.15)   | 3.53<br>(0.35,<br>7.85)    | 0.03<br>(0.00,<br>0.88)    | 0.00<br>(0.00,<br>0.03)   | 4 (3, 6)                                                         | 3 (1, 4)          | 1 (0, 3)          | 0 (0, 0)          | 0 (0, 0)     |
| C<br>Y<br>P | 36 (31, 41)                    | Xie et al. 2021     | 16.94<br>(5.51,<br>28.32)                                          | 10.87<br>(0.85,<br>23.15)  | 5.24<br>(0.11,<br>17.53)   | 1.20<br>(0.00,<br>6.94)    | 0.53<br>(0.00,<br>2.13)   | 6 (2, 10)                                                        | 4 (0, 8)          | 2 (0, 6)          | 0 (0, 2)          | 0 (0, 1)     |
| DJ<br>I     | 650 (536, 756)                 | Age-specific curves | 51.86<br>(31.21,<br>66.79)                                         | 46.67<br>(27.96,<br>60.84) | 40.92<br>(24.90,<br>53.99) | 27.68<br>(17.45,<br>37.00) | 12.45<br>(8.41,<br>16.41) | 337 (203,<br>448)                                                | 303 (183,<br>406) | 266 (162,<br>358) | 180 (115,<br>246) | 81 (53, 112) |
| DJ<br>I     | 650 (536, 756)                 | All-ages curve      | 50.07<br>(29.69,<br>66.21)                                         | 44.80<br>(22.12,<br>62.61) | 38.92<br>(14.03,<br>58.55) | 25.67<br>(2.89,<br>49.42)  | 14.63<br>(0.72,<br>39.12) | 325 (173,<br>454)                                                | 291 (130,<br>430) | 253 (87,<br>404)  | 167 (17,<br>335)  | 95 (4, 260)  |
| DJ<br>I     | 650 (536, 756)                 | Zhang et al. 2021   | 30.84<br>(22.64,<br>37.72)                                         | 27.37<br>(18.82,<br>34.65) | 23.74<br>(14.76,<br>31.44) | 15.89<br>(6.17,<br>24.49)  | 7.59<br>(0.91,<br>16.83)  | 200 (136,<br>259)                                                | 178 (115,<br>236) | 154 (90,<br>213)  | 103 (39,<br>165)  | 49 (6, 111)  |
| DJ<br>I     | 650 (536, 756)                 | Xie et al. 2021     | 40.79<br>(19.96,<br>57.68)                                         | 36.45<br>(14.00,<br>54.51) | 31.75<br>(8.04,<br>51.14)  | 21.25<br>(1.40,<br>43.66)  | 11.26<br>(0.28,<br>34.72) | 265 (124,<br>392)                                                | 237 (88,<br>368)  | 206 (51,<br>341)  | 138 (9, 290)      | 73 (2, 231)  |
| D<br>M<br>A | 12 (7, 18)                     | Age-specific curves | 16.60<br>(8.39,<br>25.63)                                          | 7.69<br>(3.81,<br>12.25)   | 0.01<br>(0.01,<br>0.04)    | 0.00<br>(0.00,<br>0.06)    | 0.00<br>(0.00,<br>0.00)   | 2 (1, 4)                                                         | 1 (0, 2)          | 0 (0, 0)          | 0 (0, 0)          | 0 (0, 0)     |
| D<br>M<br>A | 12 (7, 18)                     | All-ages curve      | 17.00<br>(4.06,<br>27.60)                                          | 9.13<br>(0.20,<br>20.30)   | 3.87<br>(0.00,<br>12.06)   | 0.88<br>(0.00,<br>3.16)    | 0.45<br>(0.00,<br>1.39)   | 2 (0, 4)                                                         | 1 (0, 3)          | 0 (0, 2)          | 0 (0, 0)          | 0 (0, 0)     |
| D<br>M<br>A | 12 (7, 18)                     | Zhang et al. 2021   | 8.62<br>(4.99,<br>11.55)                                           | 4.26<br>(0.63,<br>7.17)    | 0.66<br>(0.00,<br>2.77)    | 0.00<br>(0.00,<br>0.04)    | 0.00<br>(0.00,<br>0.00)   | 1 (0, 2)                                                         | 1 (0, 1)          | 0 (0, 0)          | 0 (0, 0)          | 0 (0, 0)     |

| IS<br>O     | Total number<br>of stillbirths | Method              | Fraction of stillbirths attributable to $PM_{2.5} > C_0 \mu g/m^3$ |                           |                          |                         |                         | Number of stillbirths attributable to $PM_{2.5} > C_0 \mu g/m^3$ |                       |                    |                  |             |
|-------------|--------------------------------|---------------------|--------------------------------------------------------------------|---------------------------|--------------------------|-------------------------|-------------------------|------------------------------------------------------------------|-----------------------|--------------------|------------------|-------------|
|             |                                |                     | $C_0 = 5$                                                          | $C_0 = 10$                | $C_0 = 15$               | $C_0 = 25$              | $C_0 = 35$              | $C_0 = 5$                                                        | $C_0 = 10$            | $C_0 = 15$         | $C_0 = 25$       | $C_0 = 35$  |
| D<br>M<br>A | 12 (7, 18)                     | Xie et al. 2021     | 11.84<br>(2.37,<br>20.79)                                          | 5.81<br>(0.09,<br>14.91)  | 2.02<br>(0.00,<br>9.10)  | 0.13<br>(0.00,<br>2.25) | 0.00<br>(0.00,<br>1.00) | 1 (0, 3)                                                         | 1 (0, 2)              | 0 (0, 1)           | 0 (0, 0)         | 0 (0, 0)    |
| D<br>O<br>M | 2,441 (1,457,<br>3,532)        | Age-specific curves | 15.44<br>(7.53,<br>23.26)                                          | 6.63<br>(3.17,<br>10.24)  | 0.42<br>(0.22,<br>0.66)  | 0.00<br>(0.00,<br>0.04) | 0.00<br>(0.00,<br>0.00) | 377 (161,<br>683)                                                | 162 (68,<br>301)      | 10 (5, 19)         | 0 (0, 1)         | 0 (0, 0)    |
| D<br>O<br>M | 2,441 (1,457,<br>3,532)        | All-ages curve      | 14.99<br>(3.89,<br>25.81)                                          | 6.56<br>(0.33,<br>18.15)  | 2.04<br>(0.02,<br>10.71) | 0.35<br>(0.00,<br>2.56) | 0.08<br>(0.00,<br>0.93) | 366 (81,<br>729)                                                 | 160 (8, 496)          | 50 (0, 277)        | 9 (0, 65)        | 2 (0, 26)   |
| D<br>O<br>M | 2,441 (1,457,<br>3,532)        | Zhang et al. 2021   | 7.88<br>(4.59,<br>10.77)                                           | 3.53<br>(0.80,<br>6.39)   | 0.68<br>(0.01,<br>2.39)  | 0.00<br>(0.00,<br>0.06) | 0.00<br>(0.00,<br>0.00) | 192 (86,<br>306)                                                 | 86 (16, 169)          | 16 (0, 61)         | 0 (0, 1)         | 0 (0, 0)    |
| D<br>O<br>M | 2,441 (1,457,<br>3,532)        | Xie et al. 2021     | 10.96<br>(2.39,<br>19.83)                                          | 5.14<br>(0.22,<br>14.12)  | 1.51<br>(0.02,<br>8.52)  | 0.28<br>(0.00,<br>1.87) | 0.13<br>(0.00,<br>0.58) | 268 (51,<br>527)                                                 | 125 (5, 362)          | 37 (1, 214)        | 7 (0, 49)        | 3 (0, 14)   |
| D<br>Z<br>A | 9,898 (8,829,<br>10,992)       | Age-specific curves | 20.80<br>(10.66,<br>31.60)                                         | 12.14<br>(6.29,<br>18.73) | 4.37<br>(2.38,<br>6.54)  | 1.05<br>(0.71,<br>1.46) | 0.38<br>(0.27,<br>0.52) | 2,059 (1,035,<br>3,168)                                          | 1,202 (604,<br>1,876) | 433 (225,<br>650)  | 103 (68,<br>146) | 38 (26, 51) |
| D<br>Z<br>A | 9,898 (8,829,<br>10,992)       | All-ages curve      | 20.19<br>(6.74,<br>31.86)                                          | 12.07<br>(1.85,<br>24.87) | 5.72<br>(0.71,<br>17.32) | 1.61<br>(0.15,<br>6.63) | 0.71<br>(0.03,<br>2.99) | 1,999 (641,<br>3,310)                                            | 1,194 (175,<br>2,561) | 566 (69,<br>1,756) | 159 (15,<br>665) | 71 (3, 289) |
| D<br>Z<br>A | 9,898 (8,829,<br>10,992)       | Zhang et al. 2021   | 10.66<br>(6.73,<br>14.14)                                          | 6.25<br>(2.48,<br>9.90)   | 2.60<br>(0.82,<br>5.68)  | 0.64<br>(0.20,<br>1.48) | 0.25<br>(0.04,<br>0.61) | 1,055 (650,<br>1,423)                                            | 618 (242,<br>983)     | 257 (80,<br>547)   | 64 (20, 143)     | 25 (4, 59)  |
| D<br>Z<br>A | 9,898 (8,829,<br>10,992)       | Xie et al. 2021     | 14.59<br>(4.31,<br>24.78)                                          | 8.50<br>(1.08,<br>19.18)  | 4.23<br>(0.38,<br>13.46) | 1.40<br>(0.09,<br>5.42) | 0.62<br>(0.03,<br>2.63) | 1,444 (421,<br>2,486)                                            | 841 (108,<br>1,922)   | 419 (38,<br>1,352) | 138 (8, 543)     | 61 (3, 254) |
| E<br>C<br>U | 3,182 (2,358,<br>3,947)        | Age-specific curves | 23.44<br>(12.24,<br>34.49)                                         | 15.22<br>(7.83,<br>22.92) | 6.54<br>(3.35,<br>10.02) | 0.07<br>(0.04,<br>0.12) | 0.00<br>(0.00,<br>0.00) | 746 (376,<br>1,224)                                              | 484 (240,<br>814)     | 208 (103,<br>355)  | 2 (1, 4)         | 0 (0, 0)    |
| E<br>C<br>U | 3,182 (2,358,<br>3,947)        | All-ages curve      | 22.65<br>(8.64,<br>35.91)                                          | 14.05<br>(2.02,<br>29.39) | 6.88<br>(0.24,<br>21.93) | 1.42<br>(0.01,<br>9.35) | 0.23<br>(0.00,<br>3.46) | 721 (243,<br>1,271)                                              | 447 (59,<br>1,002)    | 219 (8, 749)       | 45 (0, 318)      | 7 (0, 117)  |
| E<br>C<br>U | 3,182 (2,358,<br>3,947)        | Zhang et al. 2021   | 12.13<br>(7.83,<br>16.00)                                          | 7.74<br>(3.35,<br>11.83)  | 3.53<br>(0.58,<br>7.48)  | 0.15<br>(0.00,<br>1.34) | 0.01<br>(0.00,<br>0.09) | 386 (226,<br>531)                                                | 246 (100,<br>394)     | 112 (18,<br>242)   | 5 (0, 44)        | 0 (0, 3)    |

| IS<br>O | Total number<br>of stillbirths | Method              | Fraction of stillbirths attributable to $PM_{2.5} > C_0 \mu g/m^3$ |                      |                      |                      |                     | Number of stillbirths attributable to $PM_{2.5} > C_0 \mu g/m^3$ |                         |                        |                       |                      |
|---------|--------------------------------|---------------------|--------------------------------------------------------------------|----------------------|----------------------|----------------------|---------------------|------------------------------------------------------------------|-------------------------|------------------------|-----------------------|----------------------|
|         |                                |                     | $C_0 = 5$                                                          | $C_0 = 10$           | $C_0 = 15$           | $C_0 = 25$           | $C_0 = 35$          | $C_0 = 5$                                                        | $C_0 = 10$              | $C_0 = 15$             | $C_0 = 25$            | $C_0 = 35$           |
| ECU     | 3,182 (2,358, 3,947)           | Xie et al. 2021     | 16.90 (5.50, 27.79)                                                | 11.01 (1.12, 22.43)  | 5.62 (0.24, 16.68)   | 0.68 (0.02, 6.51)    | 0.28 (0.00, 2.10)   | 538 (177, 917)                                                   | 350 (38, 738)           | 179 (8, 545)           | 22 (1, 211)           | 9 (0, 70)            |
| EGY     | 26,474 (15,925, 38,258)        | Age-specific curves | 51.96 (32.81, 66.66)                                               | 46.80 (29.25, 60.93) | 41.09 (25.49, 54.17) | 28.04 (18.21, 37.38) | 14.25 (9.63, 18.78) | 13,755 (7,397, 21,466)                                           | 12,390 (6,633, 19,451)  | 10,878 (5,784, 17,124) | 7,423 (4,077, 11,657) | 3,772 (2,142, 5,844) |
| EGY     | 26,474 (15,925, 38,258)        | All-ages curve      | 50.79 (30.39, 66.35)                                               | 45.48 (23.07, 62.72) | 39.57 (15.20, 58.68) | 26.32 (4.18, 49.40)  | 14.38 (1.02, 39.08) | 13,446 (6,666, 21,866)                                           | 12,040 (5,500, 20,684)  | 10,475 (3,602, 19,097) | 6,969 (1,164, 15,048) | 3,806 (279, 11,234)  |
| EGY     | 26,474 (15,925, 38,258)        | Zhang et al. 2021   | 31.93 (23.53, 38.89)                                               | 28.57 (19.74, 35.89) | 25.03 (15.77, 32.73) | 17.43 (7.69, 25.95)  | 9.73 (1.80, 18.56)  | 8,454 (4,888, 13,347)                                            | 7,563 (4,349, 12,167)   | 6,626 (3,547, 10,980)  | 4,615 (1,846, 8,359)  | 2,576 (445, 5,749)   |
| EGY     | 26,474 (15,925, 38,258)        | Xie et al. 2021     | 42.01 (20.91, 59.00)                                               | 37.73 (15.12, 56.01) | 33.12 (9.30, 52.78)  | 22.89 (2.16, 45.53)  | 12.90 (0.49, 37.23) | 11,121 (5,205, 18,638)                                           | 9,989 (3,847, 17,218)   | 8,767 (2,384, 16,005)  | 6,059 (585, 13,193)   | 3,414 (147, 10,807)  |
| ERI     | 2,110 (1,237, 2,984)           | Age-specific curves | 43.79 (25.38, 58.95)                                               | 37.71 (21.70, 51.53) | 30.96 (17.75, 42.75) | 15.39 (9.35, 21.13)  | 4.47 (3.03, 5.77)   | 924 (410, 1,389)                                                 | 796 (352, 1,197)        | 653 (290, 985)         | 325 (154, 500)        | 94 (47, 146)         |
| ERI     | 2,110 (1,237, 2,984)           | All-ages curve      | 42.54 (23.57, 58.14)                                               | 36.65 (15.29, 53.60) | 30.11 (7.91, 48.58)  | 16.30 (1.79, 37.06)  | 7.27 (0.48, 25.07)  | 898 (386, 1,388)                                                 | 773 (251, 1,296)        | 635 (135, 1,171)       | 344 (33, 874)         | 153 (9, 565)         |
| ERI     | 2,110 (1,237, 2,984)           | Zhang et al. 2021   | 24.93 (17.85, 30.89)                                               | 21.24 (13.78, 27.48) | 17.36 (9.50, 23.89)  | 9.06 (2.69, 16.21)   | 3.35 (0.67, 8.29)   | 526 (271, 759)                                                   | 448 (222, 671)          | 366 (159, 578)         | 191 (48, 374)         | 71 (13, 182)         |
| ERI     | 2,110 (1,237, 2,984)           | Xie et al. 2021     | 33.33 (15.23, 48.90)                                               | 28.45 (9.03, 45.16)  | 23.19 (4.19, 41.13)  | 12.69 (0.91, 32.06)  | 6.38 (0.24, 22.23)  | 703 (260, 1,198)                                                 | 600 (160, 1,087)        | 489 (83, 972)          | 268 (18, 719)         | 135 (5, 489)         |
| ETH     | 94,731 (54,842, 134,031)       | Age-specific curves | 33.11 (18.22, 46.95)                                               | 25.82 (14.17, 37.39) | 17.74 (9.68, 26.14)  | 3.32 (1.91, 4.76)    | 0.39 (0.26, 0.53)   | 31,364 (14,604, 49,939)                                          | 24,461 (11,333, 39,435) | 16,805 (7,789, 27,370) | 3,143 (1,556, 5,081)  | 369 (196, 595)       |
| ETH     | 94,731 (54,842, 134,031)       | All-ages curve      | 31.91 (15.03, 46.43)                                               | 24.50 (6.97, 40.80)  | 16.50 (2.35, 34.59)  | 5.45 (0.29, 21.27)   | 1.61 (0.05, 10.76)  | 30,231 (9,564, 54,188)                                           | 23,213 (4,117, 46,162)  | 15,634 (1,561, 38,507) | 5,166 (237, 22,320)   | 1,528 (45, 10,395)   |
| ETH     | 94,731 (54,842, 134,031)       | Zhang et al. 2021   | 17.69 (12.12, 22.48)                                               | 13.64 (7.81, 18.64)  | 9.41 (3.67, 14.61)   | 2.50 (0.32, 6.48)    | 0.42 (0.02, 1.75)   | 16,756 (8,812, 24,901)                                           | 12,920 (5,605, 19,998)  | 8,913 (2,708, 15,090)  | 2,370 (258, 6,190)    | 399 (22, 1,642)      |

| IS<br>O     | Total number<br>of stillbirths | Method                     | Fraction of stillbirths attributable to $PM_{2.5} > C_0 \mu g/m^3$ |                            |                            |                           |                          | Number of stillbirths attributable to $PM_{2.5} > C_0 \mu g/m^3$ |                              |                              |                            |                      |
|-------------|--------------------------------|----------------------------|--------------------------------------------------------------------|----------------------------|----------------------------|---------------------------|--------------------------|------------------------------------------------------------------|------------------------------|------------------------------|----------------------------|----------------------|
|             |                                |                            | $C_0 = 5$                                                          | $C_0 = 10$                 | $C_0 = 15$                 | $C_0 = 25$                | $C_0 = 35$               | $C_0 = 5$                                                        | $C_0 = 10$                   | $C_0 = 15$                   | $C_0 = 25$                 | $C_0 = 35$           |
| E<br>T<br>H | 94,731<br>(54,842,<br>134,031) | Xie et<br>al. 2021         | 24.09<br>(9.62,<br>37.49)                                          | 18.59<br>(3.91,<br>32.95)  | 12.85<br>(1.11,<br>28.05)  | 4.18<br>(0.17,<br>17.57)  | 1.36<br>(0.06,<br>8.99)  | 22,819<br>(7,720,<br>38,957)                                     | 17,614<br>(3,593,<br>33,253) | 12,169<br>(1,068,<br>27,026) | 3,964 (149,<br>15,541)     | 1,286 (58,<br>7,203) |
| G<br>A<br>B | 945 (542,<br>1,333)            | Age-<br>specific<br>curves | 38.03<br>(21.06,<br>52.87)                                         | 31.37<br>(17.28,<br>44.51) | 23.99<br>(13.13,<br>34.58) | 8.26<br>(4.66,<br>11.96)  | 0.24<br>(0.15,<br>0.34)  | 359 (148,<br>577)                                                | 296 (121,<br>482)            | 227 (94,<br>373)             | 78 (34, 131)               | 2 (1, 4)             |
| G<br>A<br>B | 945 (542,<br>1,333)            | All-ages<br>curve          | 36.74<br>(18.69,<br>52.39)                                         | 29.49<br>(9.97,<br>47.27)  | 21.60<br>(3.64,<br>41.72)  | 7.83<br>(0.34,<br>29.25)  | 2.02<br>(0.01,<br>17.24) | 347 (117,<br>572)                                                | 279 (73,<br>501)             | 204 (27,<br>429)             | 74 (3, 298)                | 19 (0, 169)          |
| G<br>A<br>B | 945 (542,<br>1,333)            | Zhang et<br>al. 2021       | 20.92<br>(14.74,<br>26.45)                                         | 16.96<br>(10.57,<br>22.85) | 12.80<br>(6.26,<br>19.06)  | 4.65<br>(0.58,<br>11.19)  | 0.58<br>(0.01,<br>4.03)  | 198 (94,<br>300)                                                 | 160 (70,<br>254)             | 121 (43,<br>208)             | 44 (4, 113)                | 6 (0, 41)            |
| G<br>A<br>B | 945 (542,<br>1,333)            | Xie et<br>al. 2021         | 28.50<br>(11.99,<br>43.03)                                         | 23.42<br>(5.86,<br>38.91)  | 17.99<br>(2.09,<br>34.48)  | 7.73<br>(0.26,<br>24.70)  | 2.32<br>(0.07,<br>14.93) | 269 (95,<br>440)                                                 | 221 (47,<br>383)             | 170 (16,<br>327)             | 73 (2, 227)                | 22 (1, 135)          |
| G<br>E<br>O | 376 (356, 397)                 | Age-<br>specific<br>curves | 30.19<br>(16.28,<br>43.22)                                         | 22.62<br>(12.01,<br>33.10) | 14.22<br>(7.49,<br>21.17)  | 1.13<br>(0.61,<br>1.72)   | 0.00<br>(0.00,<br>0.00)  | 114 (60,<br>164)                                                 | 85 (44, 126)                 | 53 (27, 81)                  | 4 (2, 7)                   | 0 (0, 0)             |
| G<br>E<br>O | 376 (356, 397)                 | All-ages<br>curve          | 29.76<br>(12.58,<br>43.64)                                         | 22.66<br>(4.45,<br>37.82)  | 14.96<br>(0.95,<br>31.37)  | 4.24<br>(0.07,<br>17.65)  | 1.39<br>(0.00,<br>7.51)  | 112 (46,<br>165)                                                 | 85 (16, 142)                 | 56 (4, 118)                  | 16 (0, 66)                 | 5 (0, 28)            |
| G<br>E<br>O | 376 (356, 397)                 | Zhang et<br>al. 2021       | 16.00<br>(10.72,<br>20.47)                                         | 11.91<br>(6.27,<br>16.54)  | 7.61<br>(2.20,<br>12.45)   | 1.26<br>(0.03,<br>4.39)   | 0.01<br>(0.00,<br>0.62)  | 60 (40, 77)                                                      | 45 (23, 62)                  | 29 (8, 47)                   | 5 (0, 17)                  | 0 (0, 2)             |
| G<br>E<br>O | 376 (356, 397)                 | Xie et<br>al. 2021         | 21.92<br>(8.24,<br>34.66)                                          | 16.34<br>(2.65,<br>29.91)  | 10.64<br>(0.67,<br>24.79)  | 3.19<br>(0.07,<br>14.09)  | 0.87<br>(0.03,<br>6.24)  | 82 (31, 130)                                                     | 61 (10, 112)                 | 40 (3, 93)                   | 12 (0, 53)                 | 3 (0, 24)            |
| G<br>H<br>A | 20,577<br>(16,942,<br>24,113)  | Age-<br>specific<br>curves | 41.89<br>(24.02,<br>57.08)                                         | 35.59<br>(20.22,<br>49.31) | 28.60<br>(16.16,<br>40.12) | 12.52<br>(7.49,<br>17.52) | 3.04<br>(2.06,<br>4.05)  | 8,619 (4,832,<br>11,766)                                         | 7,323 (4,078,<br>10,168)     | 5,884 (3,257,<br>8,277)      | 2,576<br>(1,428,<br>3,612) | 626 (403,<br>848)    |
| G<br>H<br>A | 20,577<br>(16,942,<br>24,113)  | All-ages<br>curve          | 40.47<br>(21.83,<br>56.21)                                         | 34.08<br>(13.43,<br>51.59) | 26.98<br>(6.64,<br>46.45)  | 12.81<br>(1.31,<br>34.70) | 5.11<br>(0.29,<br>22.64) | 8,328 (4,136,<br>11,923)                                         | 7,013 (2,734,<br>10,947)     | 5,551 (1,403,<br>9,695)      | 2,636 (277,<br>6,790)      | 1,051 (62,<br>4,446) |
| G<br>H<br>A | 20,577<br>(16,942,<br>24,113)  | Zhang et<br>al. 2021       | 23.44<br>(16.65,<br>29.20)                                         | 19.66<br>(12.52,<br>25.70) | 15.68<br>(8.20,<br>22.02)  | 7.46<br>(1.88,<br>14.11)  | 2.31<br>(0.22,<br>6.62)  | 4,824 (3,132,<br>6,403)                                          | 4,045 (2,404,<br>5,608)      | 3,226 (1,576,<br>4,708)      | 1,535 (366,<br>2,940)      | 475 (44,<br>1,381)   |

| IS<br>O     | Total number<br>of stillbirths | Method                     | Fraction of stillbirths attributable to $PM_{2.5} > C_0 \mu g/m^3$ |                            |                            |                            |                           | Number of stillbirths attributable to $PM_{2.5} > C_0 \mu g/m^3$ |                         |                         |                       |                    |
|-------------|--------------------------------|----------------------------|--------------------------------------------------------------------|----------------------------|----------------------------|----------------------------|---------------------------|------------------------------------------------------------------|-------------------------|-------------------------|-----------------------|--------------------|
|             |                                |                            | $C_0 = 5$                                                          | $C_0 = 10$                 | $C_0 = 15$                 | $C_0 = 25$                 | $C_0 = 35$                | $C_0 = 5$                                                        | $C_0 = 10$              | $C_0 = 15$              | $C_0 = 25$            | $C_0 = 35$         |
| G<br>H<br>A | 20,577<br>(16,942,<br>24,113)  | Xie et<br>al. 2021         | 31.41<br>(14.06,<br>46.69)                                         | 26.30<br>(7.85,<br>42.71)  | 20.79<br>(3.32,<br>38.42)  | 10.50<br>(0.56,<br>28.77)  | 4.63<br>(0.19,<br>18.89)  | 6,463 (2,947,<br>9,624)                                          | 5,412 (1,697,<br>8,714) | 4,278 (721,<br>7,843)   | 2,160 (119,<br>5,897) | 953 (41,<br>3,830) |
| GI<br>N     | 11,359 (7,163,<br>16,376)      | Age-<br>specific<br>curves | 40.83<br>(23.13,<br>56.05)                                         | 34.44<br>(19.31,<br>48.26) | 27.35<br>(15.16,<br>38.98) | 11.07<br>(6.30,<br>16.04)  | 0.19<br>(0.13,<br>0.27)   | 4,638 (2,375,<br>7,464)                                          | 3,912 (1,987,<br>6,384) | 3,107 (1,573,<br>5,122) | 1,258 (643,<br>2,106) | 22 (12, 36)        |
| GI<br>N     | 11,359 (7,163,<br>16,376)      | All-ages<br>curve          | 39.86<br>(20.49,<br>55.49)                                         | 33.55<br>(11.72,<br>50.78) | 26.55<br>(4.64,<br>45.55)  | 12.02<br>(0.55,<br>33.79)  | 3.30<br>(0.04,<br>21.43)  | 4,528 (1,645,<br>7,012)                                          | 3,811 (963,<br>6,386)   | 3,016 (401,<br>5,694)   | 1,366 (50,<br>4,170)  | 375 (4,<br>2,543)  |
| GI<br>N     | 11,359 (7,163,<br>16,376)      | Zhang et<br>al. 2021       | 22.63<br>(16.00,<br>28.33)                                         | 18.80<br>(11.84,<br>24.80) | 14.77<br>(7.47,<br>21.12)  | 6.15<br>(0.72,<br>13.22)   | 0.82<br>(0.01,<br>5.05)   | 2,571 (1,446,<br>3,802)                                          | 2,135 (1,099,<br>3,254) | 1,678 (729,<br>2,741)   | 699 (80,<br>1,616)    | 93 (1, 613)        |
| GI<br>N     | 11,359 (7,163,<br>16,376)      | Xie et<br>al. 2021         | 30.45<br>(13.41,<br>45.67)                                         | 25.27<br>(7.14,<br>41.61)  | 19.67<br>(2.58,<br>37.21)  | 8.71<br>(0.27,<br>27.48)   | 3.07<br>(0.08,<br>16.79)  | 3,459 (1,384,<br>5,944)                                          | 2,871 (746,<br>5,272)   | 2,235 (269,<br>4,705)   | 990 (33,<br>3,421)    | 349 (9,<br>2,027)  |
| G<br>M<br>B | 1,972 (1,342,<br>2,649)        | Age-<br>specific<br>curves | 52.22<br>(31.69,<br>67.08)                                         | 47.06<br>(28.38,<br>61.18) | 41.34<br>(25.31,<br>54.50) | 28.18<br>(17.94,<br>37.76) | 12.98<br>(8.63,<br>17.26) | 1,030 (549,<br>1,571)                                            | 928 (489,<br>1,430)     | 815 (425,<br>1,266)     | 556 (296,<br>876)     | 256 (134,<br>403)  |
| G<br>M<br>B | 1,972 (1,342,<br>2,649)        | All-ages<br>curve          | 50.29<br>(29.88,<br>66.54)                                         | 44.89<br>(22.22,<br>62.93) | 38.88<br>(13.93,<br>58.93) | 25.13<br>(3.30,<br>49.74)  | 13.03<br>(0.69,<br>39.46) | 992 (524,<br>1,522)                                              | 885 (387,<br>1,425)     | 767 (243,<br>1,319)     | 496 (60,<br>1,068)    | 257 (14,<br>799)   |
| G<br>M<br>B | 1,972 (1,342,<br>2,649)        | Zhang et<br>al. 2021       | 31.16<br>(22.80,<br>37.99)                                         | 27.78<br>(18.97,<br>34.92) | 24.24<br>(14.96,<br>31.69) | 16.62<br>(6.29,<br>24.73)  | 8.27<br>(0.81,<br>17.08)  | 614 (385,<br>898)                                                | 548 (328,<br>820)       | 478 (273,<br>735)       | 328 (125,<br>560)     | 163 (18,<br>369)   |
| G<br>M<br>B | 1,972 (1,342,<br>2,649)        | Xie et<br>al. 2021         | 41.16<br>(20.31,<br>58.01)                                         | 36.89<br>(14.57,<br>54.77) | 32.27<br>(8.52,<br>51.26)  | 21.94<br>(1.61,<br>43.47)  | 11.71<br>(0.37,<br>34.44) | 812 (378,<br>1,341)                                              | 727 (276,<br>1,259)     | 636 (159,<br>1,170)     | 433 (33,<br>996)      | 231 (7, 768)       |
| G<br>N<br>B | 2,287 (1,665,<br>2,974)        | Age-<br>specific<br>curves | 44.92<br>(26.01,<br>60.51)                                         | 38.97<br>(22.33,<br>53.40) | 32.36<br>(18.38,<br>44.99) | 17.15<br>(9.92,<br>24.24)  | 1.72<br>(1.08,<br>2.41)   | 1,027 (566,<br>1,497)                                            | 891 (489,<br>1,321)     | 740 (404,<br>1,113)     | 392 (211,<br>603)     | 39 (24, 61)        |
| G<br>N<br>B | 2,287 (1,665,<br>2,974)        | All-ages<br>curve          | 43.22<br>(24.23,<br>59.61)                                         | 36.80<br>(16.15,<br>55.38) | 29.63<br>(8.05,<br>50.69)  | 14.12<br>(1.06,<br>39.97)  | 4.97<br>(0.12,<br>28.01)  | 988 (482,<br>1,577)                                              | 842 (299,<br>1,434)     | 678 (154,<br>1,314)     | 323 (25,<br>992)      | 114 (3, 664)       |
| G<br>N<br>B | 2,287 (1,665,<br>2,974)        | Zhang et<br>al. 2021       | 25.40<br>(18.21,<br>31.51)                                         | 21.70<br>(14.18,<br>28.13) | 17.82<br>(9.99,<br>24.59)  | 9.47<br>(1.96,<br>16.95)   | 2.38<br>(0.07,<br>8.63)   | 581 (360,<br>825)                                                | 496 (276,<br>730)       | 408 (202,<br>614)       | 217 (42,<br>397)      | 54 (2, 199)        |

| IS<br>O     | Total number<br>of stillbirths | Method                     | Fraction of stillbirths attributable to $PM_{2.5} > C_0 \mu g/m^3$ |                            |                            |                            |                          | Number of stillbirths attributable to $PM_{2.5} > C_0 \mu g/m^3$ |                         |                       |                    |                    |
|-------------|--------------------------------|----------------------------|--------------------------------------------------------------------|----------------------------|----------------------------|----------------------------|--------------------------|------------------------------------------------------------------|-------------------------|-----------------------|--------------------|--------------------|
|             |                                |                            | $C_0 = 5$                                                          | $C_0 = 10$                 | $C_0 = 15$                 | $C_0 = 25$                 | $C_0 = 35$               | $C_0 = 5$                                                        | $C_0 = 10$              | $C_0 = 15$            | $C_0 = 25$         | $C_0 = 35$         |
| G<br>N<br>B | 2,287 (1,665,<br>2,974)        | Xie et<br>al. 2021         | 34.11<br>(15.67,<br>49.99)                                         | 29.36<br>(9.57,<br>46.35)  | 24.24<br>(4.09,<br>42.43)  | 13.24<br>(0.53,<br>33.63)  | 4.86<br>(0.10,<br>23.59) | 780 (319,<br>1,294)                                              | 671 (203,<br>1,192)     | 554 (87,<br>1,073)    | 303 (11,<br>830)   | 111 (3, 575)       |
| G<br>N<br>Q | 627 (334, 909)                 | Age-<br>specific<br>curves | 46.10<br>(26.87,<br>61.34)                                         | 40.42<br>(23.44,<br>54.47) | 34.22<br>(19.83,<br>46.54) | 20.22<br>(12.47,<br>27.88) | 5.82<br>(3.93,<br>7.62)  | 289 (141,<br>465)                                                | 253 (123,<br>414)       | 215 (104,<br>354)     | 127 (64,<br>209)   | 36 (19, 58)        |
| G<br>N<br>Q | 627 (334, 909)                 | All-ages<br>curve          | 45.33<br>(25.87,<br>61.25)                                         | 39.63<br>(17.82,<br>57.04) | 33.39<br>(9.76,<br>52.36)  | 19.76<br>(1.90,<br>41.80)  | 9.37<br>(0.45,<br>30.41) | 284 (120,<br>458)                                                | 248 (81,<br>421)        | 209 (47,<br>375)      | 124 (10,<br>288)   | 59 (3, 194)        |
| G<br>N<br>Q | 627 (334, 909)                 | Zhang et<br>al. 2021       | 27.08<br>(19.59,<br>33.38)                                         | 23.47<br>(15.62,<br>30.08) | 19.71<br>(11.51,<br>26.62) | 11.73<br>(3.56,<br>19.30)  | 4.46<br>(0.66,<br>11.45) | 170 (83,<br>252)                                                 | 147 (71,<br>226)        | 124 (55,<br>200)      | 74 (20, 137)       | 28 (4, 82)         |
| G<br>N<br>Q | 627 (334, 909)                 | Xie et<br>al. 2021         | 36.08<br>(16.99,<br>52.20)                                         | 31.42<br>(11.02,<br>48.74) | 26.45<br>(5.68,<br>45.00)  | 15.83<br>(1.17,<br>36.72)  | 7.41<br>(0.33,<br>27.27) | 226 (86,<br>364)                                                 | 197 (56,<br>340)        | 166 (30,<br>315)      | 99 (7, 246)        | 46 (2, 180)        |
| G<br>R<br>D | 19 (11, 27)                    | Age-<br>specific<br>curves | 19.68<br>(10.02,<br>30.01)                                         | 11.06<br>(5.54,<br>17.38)  | 1.54<br>(0.76,<br>2.48)    | 0.00<br>(0.00,<br>0.02)    | 0.00<br>(0.00,<br>0.00)  | 4 (2, 7)                                                         | 2 (1, 4)                | 0 (0, 1)              | 0 (0, 0)           | 0 (0, 0)           |
| G<br>R<br>D | 19 (11, 27)                    | All-ages<br>curve          | 19.45<br>(5.69,<br>31.71)                                          | 11.05<br>(0.56,<br>24.68)  | 3.45<br>(0.01,<br>16.80)   | 0.24<br>(0.00,<br>6.42)    | 0.16<br>(0.00,<br>2.33)  | 4 (1, 7)                                                         | 2 (0, 5)                | 1 (0, 3)              | 0 (0, 1)           | 0 (0, 0)           |
| G<br>R<br>D | 19 (11, 27)                    | Zhang et<br>al. 2021       | 10.12<br>(6.26,<br>13.56)                                          | 5.74<br>(1.47,<br>9.33)    | 1.31<br>(0.01,<br>4.96)    | 0.00<br>(0.00,<br>0.19)    | 0.00<br>(0.00,<br>0.00)  | 2 (1, 3)                                                         | 1 (0, 2)                | 0 (0, 1)              | 0 (0, 0)           | 0 (0, 0)           |
| G<br>R<br>D | 19 (11, 27)                    | Xie et<br>al. 2021         | 13.84<br>(3.19,<br>24.23)                                          | 7.46<br>(0.14,<br>18.74)   | 3.47<br>(0.01,<br>12.98)   | 1.05<br>(0.00,<br>3.90)    | 0.78<br>(0.00,<br>1.74)  | 3 (0, 5)                                                         | 1 (0, 4)                | 1 (0, 3)              | 0 (0, 1)           | 0 (0, 0)           |
| G<br>T<br>M | 5,951 (5,091,<br>6,782)        | Age-<br>specific<br>curves | 37.93<br>(21.60,<br>52.08)                                         | 31.25<br>(17.76,<br>43.54) | 23.85<br>(13.68,<br>33.48) | 9.31<br>(5.77,<br>12.92)   | 2.45<br>(1.65,<br>3.23)  | 2,257 (1,278,<br>3,181)                                          | 1,860 (1,036,<br>2,666) | 1,419 (780,<br>2,059) | 554 (333,<br>788)  | 146 (93,<br>198)   |
| G<br>T<br>M | 5,951 (5,091,<br>6,782)        | All-ages<br>curve          | 36.99<br>(19.49,<br>52.16)                                         | 30.14<br>(11.44,<br>47.11) | 22.68<br>(5.46,<br>41.52)  | 10.20<br>(1.10,<br>29.27)  | 4.07<br>(0.30,<br>18.42) | 2,201 (1,077,<br>3,258)                                          | 1,793 (643,<br>2,935)   | 1,349 (318,<br>2,590) | 607 (65,<br>1,777) | 242 (18,<br>1,086) |
| G<br>T<br>M | 5,951 (5,091,<br>6,782)        | Zhang et<br>al. 2021       | 21.27<br>(14.96,<br>26.65)                                         | 17.39<br>(10.76,<br>23.04) | 13.32<br>(6.59,<br>19.24)  | 5.90<br>(1.57,<br>11.36)   | 1.97<br>(0.26,<br>5.20)  | 1,266 (834,<br>1,636)                                            | 1,035 (604,<br>1,416)   | 793 (367,<br>1,185)   | 351 (88,<br>689)   | 117 (14,<br>319)   |

| IS<br>O     | Total number<br>of stillbirths | Method                     | Fraction of stillbirths attributable to $PM_{2.5} > C_0 \mu g/m^3$ |                            |                            |                           |                          | Number of stillbirths attributable to $PM_{2.5} > C_0 \mu g/m^3$ |                       |                       |                    |                  |
|-------------|--------------------------------|----------------------------|--------------------------------------------------------------------|----------------------------|----------------------------|---------------------------|--------------------------|------------------------------------------------------------------|-----------------------|-----------------------|--------------------|------------------|
|             |                                |                            | $C_0 = 5$                                                          | $C_0 = 10$                 | $C_0 = 15$                 | $C_0 = 25$                | $C_0 = 35$               | $C_0 = 5$                                                        | $C_0 = 10$            | $C_0 = 15$            | $C_0 = 25$         | $C_0 = 35$       |
| G<br>T<br>M | 5,951 (5,091,<br>6,782)        | Xie et<br>al. 2021         | 28.65<br>(12.45,<br>43.09)                                         | 23.44<br>(6.59,<br>38.92)  | 17.91<br>(2.83,<br>34.42)  | 8.44<br>(0.57,<br>24.63)  | 3.65<br>(0.19,<br>15.64) | 1,705 (697,<br>2,573)                                            | 1,395 (366,<br>2,309) | 1,066 (161,<br>2,007) | 502 (32,<br>1,367) | 217 (11,<br>847) |
| G<br>U<br>Y | 236 (152, 315)                 | Age-<br>specific<br>curves | 27.04<br>(14.22,<br>39.16)                                         | 19.16<br>(9.89,<br>28.48)  | 10.42<br>(5.29,<br>15.90)  | 0.00<br>(0.00,<br>0.00)   | 0.00<br>(0.00,<br>0.00)  | 64 (29, 101)                                                     | 45 (20, 73)           | 25 (11, 40)           | 0 (0, 0)           | 0 (0, 0)         |
| G<br>U<br>Y | 236 (152, 315)                 | All-ages<br>curve          | 26.44<br>(10.24,<br>39.77)                                         | 18.56<br>(2.74,<br>33.30)  | 10.43<br>(0.24,<br>26.09)  | 3.04<br>(0.00,<br>12.59)  | 0.17<br>(0.00,<br>4.36)  | 62 (22, 108)                                                     | 44 (6, 90)            | 25 (1, 72)            | 7 (0, 29)          | 0 (0, 10)        |
| G<br>U<br>Y | 236 (152, 315)                 | Zhang et<br>al. 2021       | 14.11<br>(9.34,<br>18.30)                                          | 9.86<br>(4.82,<br>14.29)   | 5.40<br>(0.79,<br>10.14)   | 0.23<br>(0.00,<br>2.01)   | 0.02<br>(0.00,<br>0.08)  | 33 (17, 48)                                                      | 23 (9, 36)            | 13 (2, 24)            | 1 (0, 4)           | 0 (0, 0)         |
| G<br>U<br>Y | 236 (152, 315)                 | Xie et<br>al. 2021         | 19.65<br>(6.41,<br>31.51)                                          | 14.08<br>(1.28,<br>26.55)  | 8.20<br>(0.23,<br>20.92)   | 1.48<br>(0.00,<br>8.80)   | 0.26<br>(0.00,<br>2.97)  | 46 (15, 81)                                                      | 33 (2, 66)            | 19 (0, 50)            | 4 (0, 22)          | 1 (0, 8)         |
| H<br>N<br>D | 1,873 (1,776,<br>1,969)        | Age-<br>specific<br>curves | 39.22<br>(21.83,<br>54.03)                                         | 32.70<br>(18.08,<br>45.87) | 25.48<br>(14.10,<br>36.26) | 9.77<br>(5.53,<br>14.07)  | 0.56<br>(0.37,<br>0.79)  | 734 (417,<br>1,008)                                              | 612 (344,<br>856)     | 477 (265,<br>679)     | 183 (104,<br>266)  | 11 (7, 15)       |
| H<br>N<br>D | 1,873 (1,776,<br>1,969)        | All-ages<br>curve          | 38.42<br>(19.91,<br>53.92)                                         | 31.80<br>(11.40,<br>49.00) | 24.49<br>(4.68,<br>43.51)  | 10.70<br>(0.62,<br>31.15) | 3.59<br>(0.10,<br>19.18) | 720 (364,<br>1,023)                                              | 596 (209,<br>926)     | 459 (86,<br>820)      | 200 (11,<br>591)   | 67 (2, 360)      |
| H<br>N<br>D | 1,873 (1,776,<br>1,969)        | Zhang et<br>al. 2021       | 21.87<br>(15.38,<br>27.40)                                         | 18.02<br>(11.20,<br>23.83) | 13.99<br>(6.89,<br>20.07)  | 5.81<br>(0.82,<br>12.09)  | 0.96<br>(0.02,<br>4.70)  | 410 (286,<br>517)                                                | 338 (209,<br>450)     | 262 (130,<br>379)     | 109 (16,<br>231)   | 18 (0, 89)       |
| H<br>N<br>D | 1,873 (1,776,<br>1,969)        | Xie et<br>al. 2021         | 29.50<br>(12.83,<br>44.41)                                         | 24.35<br>(6.66,<br>40.36)  | 18.83<br>(2.28,<br>35.99)  | 8.28<br>(0.30,<br>26.28)  | 2.88<br>(0.11,<br>16.30) | 553 (239,<br>838)                                                | 456 (126,<br>758)     | 353 (43,<br>671)      | 155 (6, 486)       | 54 (2, 303)      |
| H<br>T<br>I | 5,802 (3,488,<br>8,126)        | Age-<br>specific<br>curves | 18.48<br>(9.70,<br>27.80)                                          | 9.53<br>(4.91,<br>14.69)   | 2.01<br>(1.06,<br>3.14)    | 0.00<br>(0.00,<br>0.04)   | 0.00<br>(0.00,<br>0.00)  | 1,072 (490,<br>1,844)                                            | 553 (250,<br>972)     | 117 (53,<br>207)      | 0 (0, 2)           | 0 (0, 0)         |
| H<br>T<br>I | 5,802 (3,488,<br>8,126)        | All-ages<br>curve          | 17.53<br>(5.18,<br>29.28)                                          | 8.63<br>(0.61,<br>21.92)   | 2.95<br>(0.09,<br>13.95)   | 0.33<br>(0.00,<br>3.96)   | 0.07<br>(0.00,<br>1.36)  | 1,017 (243,<br>1,934)                                            | 501 (30,<br>1,384)    | 171 (5, 857)          | 19 (0, 235)        | 4 (0, 68)        |
| H<br>T<br>I | 5,802 (3,488,<br>8,126)        | Zhang et<br>al. 2021       | 9.27<br>(5.65,<br>12.53)                                           | 4.79<br>(1.47,<br>8.22)    | 1.34<br>(0.11,<br>3.97)    | 0.01<br>(0.00,<br>0.22)   | 0.00<br>(0.00,<br>0.01)  | 538 (248,<br>825)                                                | 278 (71,<br>523)      | 78 (5, 238)           | 1 (0, 14)          | 0 (0, 0)         |



| IS<br>O | Total number<br>of stillbirths | Method              | Fraction of stillbirths attributable to $PM_{2.5} > C_0 \mu g/m^3$ |                         |                         |                         |                         | Number of stillbirths attributable to $PM_{2.5} > C_0 \mu g/m^3$ |                               |                               |                              |                              |
|---------|--------------------------------|---------------------|--------------------------------------------------------------------|-------------------------|-------------------------|-------------------------|-------------------------|------------------------------------------------------------------|-------------------------------|-------------------------------|------------------------------|------------------------------|
|         |                                |                     | $C_0 = 5$                                                          | $C_0 = 10$              | $C_0 = 15$              | $C_0 = 25$              | $C_0 = 35$              | $C_0 = 5$                                                        | $C_0 = 10$                    | $C_0 = 15$                    | $C_0 = 25$                   | $C_0 = 35$                   |
| HTI     | 5,802 (3,488, 8,126)           | Xie et al. 2021     | 12.89<br>(3.43, 22.50)                                             | 6.79<br>(0.44, 16.86)   | 2.53<br>(0.06, 10.99)   | 0.24<br>(0.01, 3.10)    | 0.14<br>(0.00, 0.94)    | 748 (197, 1,378)                                                 | 394 (28, 1,005)               | 147 (3, 613)                  | 14 (0, 168)                  | 8 (0, 52)                    |
| IDN     | 51,944<br>(41,914, 62,655)     | Age-specific curves | 33.17<br>(18.43, 46.23)                                            | 25.95<br>(14.38, 36.53) | 18.53<br>(10.31, 26.05) | 7.43<br>(4.61, 10.14)   | 2.32<br>(1.57, 3.01)    | 17,231<br>(9,687, 24,775)                                        | 13,482<br>(7,568, 19,486)     | 9,628 (5,461, 13,863)         | 3,857<br>(2,440, 5,449)      | 1,205 (757, 1,634)           |
| IDN     | 51,944<br>(41,914, 62,655)     | All-ages curve      | 32.29<br>(15.98, 46.27)                                            | 25.20<br>(8.88, 40.53)  | 18.22<br>(4.29, 34.30)  | 8.46<br>(0.91, 22.42)   | 3.61<br>(0.23, 13.92)   | 16,773<br>(7,489, 25,371)                                        | 13,091<br>(4,173, 21,862)     | 9,465 (2,070, 18,405)         | 4,392 (456, 11,850)          | 1,875 (111, 7,138)           |
| IDN     | 51,944<br>(41,914, 62,655)     | Zhang et al. 2021   | 18.37<br>(12.74, 23.22)                                            | 14.34<br>(8.56, 19.42)  | 10.42<br>(5.11, 15.52)  | 4.66<br>(1.45, 8.74)    | 1.87<br>(0.38, 4.32)    | 9,542 (6,098, 13,385)                                            | 7,450 (4,195, 11,110)         | 5,412 (2,541, 8,808)          | 2,419 (705, 4,870)           | 973 (191, 2,411)             |
| IDN     | 51,944<br>(41,914, 62,655)     | Xie et al. 2021     | 24.79<br>(10.23, 37.98)                                            | 19.38<br>(5.17, 33.42)  | 14.31<br>(2.45, 28.55)  | 6.95<br>(0.55, 19.36)   | 3.14<br>(0.18, 12.22)   | 12,878<br>(5,209, 20,331)                                        | 10,066<br>(2,698, 17,700)     | 7,435 (1,311, 14,896)         | 3,613 (302, 10,059)          | 1,629 (96, 6,393)            |
| IND     | 421,034<br>(368,518, 470,823)  | Age-specific curves | 56.27<br>(40.10, 68.57)                                            | 51.50<br>(36.87, 63.49) | 46.23<br>(32.90, 57.39) | 34.67<br>(23.88, 43.41) | 23.90<br>(14.63, 32.07) | 236,922<br>(161,625, 302,679)                                    | 216,838<br>(150,653, 279,132) | 194,625<br>(137,520, 250,658) | 145,962<br>(99,074, 189,390) | 100,634<br>(62,376, 140,146) |
| IND     | 421,034<br>(368,518, 470,823)  | All-ages curve      | 55.37<br>(35.99, 68.22)                                            | 50.59<br>(29.53, 64.82) | 45.31<br>(22.57, 61.04) | 34.14<br>(11.68, 52.48) | 24.07<br>(5.49, 43.44)  | 233,127<br>(156,665, 302,441)                                    | 212,987<br>(129,705, 287,483) | 190,751<br>(100,932, 271,295) | 143,723<br>(51,863, 230,341) | 101,348<br>(24,337, 188,570) |
| IND     | 421,034<br>(368,518, 470,823)  | Zhang et al. 2021   | 40.03<br>(30.65, 47.39)                                            | 37.07<br>(27.22, 44.79) | 33.96<br>(23.69, 42.06) | 27.54<br>(16.95, 36.27) | 21.53<br>(11.39, 30.38) | 168,538<br>(126,633, 206,809)                                    | 156,059<br>(111,988, 195,274) | 142,986<br>(97,018, 183,199)  | 115,938<br>(70,792, 157,502) | 90,653<br>(47,537, 131,593)  |
| IND     | 421,034<br>(368,518, 470,823)  | Xie et al. 2021     | 50.83<br>(28.08, 66.86)                                            | 47.24<br>(22.95, 64.43) | 43.40<br>(18.08, 61.81) | 35.39<br>(10.28, 56.01) | 27.88<br>(5.23, 49.77)  | 214,023<br>(118,727, 288,799)                                    | 198,886<br>(97,616, 276,843)  | 182,734<br>(77,374, 263,955)  | 148,999<br>(44,400, 238,421) | 117,404<br>(22,598, 211,861) |
| IRN     | 11,120 (6,436, 15,839)         | Age-specific curves | 47.93<br>(28.71, 62.42)                                            | 42.36<br>(25.30, 55.78) | 36.17<br>(21.66, 48.09) | 22.01<br>(14.02, 29.19) | 8.98<br>(5.80, 11.52)   | 5,330 (2,324, 8,042)                                             | 4,710 (2,038, 7,197)          | 4,023 (1,814, 6,192)          | 2,448<br>(1,175, 3,695)      | 998 (516, 1,475)             |
| IRN     | 11,120 (6,436, 15,839)         | All-ages curve      | 46.79<br>(27.33, 62.61)                                            | 41.19<br>(19.46, 58.60) | 34.95<br>(11.54, 54.13) | 21.59<br>(3.23, 43.87)  | 11.34<br>(1.08, 32.76)  | 5,203 (2,341, 8,098)                                             | 4,580 (1,741, 7,432)          | 3,887 (1,061, 6,750)          | 2,400 (348, 5,249)           | 1,260 (112, 3,722)           |
| IRN     | 11,120 (6,436, 15,839)         | Zhang et al. 2021   | 28.92<br>(21.15, 35.38)                                            | 25.41<br>(17.25, 32.19) | 21.72<br>(13.16, 28.84) | 13.83<br>(5.62, 21.62)  | 7.01<br>(2.23, 14.01)   | 3,216 (1,587, 4,650)                                             | 2,826 (1,297, 4,174)          | 2,415 (989, 3,696)            | 1,538 (475, 2,714)           | 780 (196, 1,695)             |

| IS<br>O | Total number<br>of stillbirths | Method                     | Fraction of stillbirths attributable to $PM_{2.5} > C_0 \mu g/m^3$ |                            |                            |                            |                            | Number of stillbirths attributable to $PM_{2.5} > C_0 \mu g/m^3$ |                          |                          |                            |                            |
|---------|--------------------------------|----------------------------|--------------------------------------------------------------------|----------------------------|----------------------------|----------------------------|----------------------------|------------------------------------------------------------------|--------------------------|--------------------------|----------------------------|----------------------------|
|         |                                |                            | $C_0 = 5$                                                          | $C_0 = 10$                 | $C_0 = 15$                 | $C_0 = 25$                 | $C_0 = 35$                 | $C_0 = 5$                                                        | $C_0 = 10$               | $C_0 = 15$               | $C_0 = 25$                 | $C_0 = 35$                 |
| IR<br>N | 11,120 (6,436,<br>15,839)      | Xie et<br>al. 2021         | 38.20<br>(18.54,<br>54.32)                                         | 33.69<br>(12.60,<br>50.96) | 28.83<br>(7.32,<br>47.33)  | 18.64<br>(2.45,<br>39.18)  | 10.70<br>(0.90,<br>30.09)  | 4,248 (1,437,<br>7,688)                                          | 3,747 (972,<br>7,190)    | 3,206 (538,<br>6,613)    | 2,073 (172,<br>5,367)      | 1,190 (66,<br>4,111)       |
| IR<br>Q | 14,408 (8,531,<br>20,194)      | Age-<br>specific<br>curves | 56.91<br>(38.29,<br>70.55)                                         | 52.30<br>(35.43,<br>65.30) | 47.20<br>(32.05,<br>59.47) | 35.48<br>(25.03,<br>44.77) | 22.11<br>(14.23,<br>28.17) | 8,199 (4,688,<br>12,270)                                         | 7,536 (4,300,<br>11,386) | 6,800 (3,932,<br>10,373) | 5,112<br>(2,926,<br>7,710) | 3,186<br>(1,716,<br>4,911) |
| IR<br>Q | 14,408 (8,531,<br>20,194)      | All-ages<br>curve          | 54.98<br>(33.51,<br>68.83)                                         | 50.13<br>(26.43,<br>65.49) | 44.73<br>(18.74,<br>61.77) | 32.34<br>(6.63,<br>53.22)  | 20.37<br>(2.14,<br>43.60)  | 7,922 (3,997,<br>11,617)                                         | 7,223 (3,120,<br>10,894) | 6,444 (2,399,<br>10,047) | 4,660<br>(1,049,<br>8,557) | 2,935 (315,<br>6,790)      |
| IR<br>Q | 14,408 (8,531,<br>20,194)      | Zhang et<br>al. 2021       | 36.59<br>(27.42,<br>44.00)                                         | 33.46<br>(23.83,<br>41.23) | 30.17<br>(20.07,<br>38.33) | 23.09<br>(12.04,<br>32.06) | 15.42<br>(5.20,<br>25.15)  | 5,272 (3,086,<br>7,447)                                          | 4,821 (2,703,<br>6,858)  | 4,347 (2,289,<br>6,320)  | 3,326<br>(1,404,<br>5,077) | 2,221 (625,<br>3,974)      |
| IR<br>Q | 14,408 (8,531,<br>20,194)      | Xie et<br>al. 2021         | 47.56<br>(24.78,<br>64.77)                                         | 43.76<br>(19.24,<br>62.20) | 39.66<br>(13.43,<br>59.43) | 30.50<br>(4.88,<br>53.22)  | 20.83<br>(1.59,<br>45.98)  | 6,852 (2,540,<br>10,904)                                         | 6,304 (2,118,<br>10,363) | 5,714 (1,631,<br>9,830)  | 4,394 (584,<br>8,595)      | 3,001 (198,<br>7,328)      |
| IS<br>R | 467 (442, 490)                 | Age-<br>specific<br>curves | 30.21<br>(15.69,<br>44.64)                                         | 22.71<br>(11.72,<br>34.41) | 14.36<br>(7.41,<br>22.25)  | 0.42<br>(0.23,<br>0.65)    | 0.00<br>(0.00,<br>0.00)    | 141 (73,<br>210)                                                 | 106 (54,<br>162)         | 67 (35, 105)             | 2 (1, 3)                   | 0 (0, 0)                   |
| IS<br>R | 467 (442, 490)                 | All-ages<br>curve          | 29.24<br>(13.03,<br>43.66)                                         | 21.43<br>(4.55,<br>38.03)  | 12.98<br>(0.96,<br>31.93)  | 3.14<br>(0.04,<br>17.63)   | 0.82<br>(0.00,<br>7.61)    | 137 (60,<br>207)                                                 | 100 (21,<br>179)         | 61 (4, 149)              | 15 (0, 81)                 | 4 (0, 35)                  |
| IS<br>R | 467 (442, 490)                 | Zhang et<br>al. 2021       | 15.98<br>(10.81,<br>20.45)                                         | 11.86<br>(6.40,<br>16.54)  | 7.54<br>(2.11,<br>12.45)   | 0.91<br>(0.02,<br>3.97)    | 0.03<br>(0.00,<br>0.39)    | 75 (50, 96)                                                      | 55 (30, 78)              | 35 (10, 59)              | 4 (0, 19)                  | 0 (0, 2)                   |
| IS<br>R | 467 (442, 490)                 | Xie et<br>al. 2021         | 21.85<br>(8.28,<br>34.70)                                          | 16.19<br>(2.63,<br>29.95)  | 10.23<br>(0.50,<br>24.84)  | 1.97<br>(0.04,<br>13.40)   | 0.58<br>(0.01,<br>5.33)    | 102 (38,<br>163)                                                 | 76 (12, 140)             | 48 (2, 114)              | 9 (0, 62)                  | 3 (0, 25)                  |
| JA<br>M | 673 (531, 815)                 | Age-<br>specific<br>curves | 27.81<br>(14.73,<br>40.21)                                         | 19.99<br>(10.47,<br>29.51) | 11.39<br>(6.03,<br>17.01)  | 1.40<br>(0.79,<br>2.09)    | 0.00<br>(0.00,<br>0.00)    | 187 (104,<br>265)                                                | 135 (74,<br>194)         | 77 (42, 111)             | 9 (5, 14)                  | 0 (0, 0)                   |
| JA<br>M | 673 (531, 815)                 | All-ages<br>curve          | 27.15<br>(11.27,<br>40.55)                                         | 19.49<br>(3.85,<br>34.34)  | 12.17<br>(0.84,<br>27.46)  | 3.17<br>(0.04,<br>15.49)   | 0.58<br>(0.00,<br>7.04)    | 183 (72,<br>291)                                                 | 131 (25,<br>240)         | 82 (6, 193)              | 21 (0, 109)                | 4 (0, 49)                  |
| JA<br>M | 673 (531, 815)                 | Zhang et<br>al. 2021       | 14.68<br>(9.71,<br>18.92)                                          | 10.51<br>(5.28,<br>14.93)  | 6.30<br>(1.94,<br>10.75)   | 1.35<br>(0.03,<br>3.90)    | 0.01<br>(0.00,<br>0.67)    | 99 (59, 137)                                                     | 71 (32, 107)             | 42 (12, 75)              | 9 (0, 26)                  | 0 (0, 5)                   |

| IS<br>O | Total number<br>of stillbirths | Method              | Fraction of stillbirths attributable to $PM_{2.5} > C_0 \mu g/m^3$ |                         |                         |                        |                       | Number of stillbirths attributable to $PM_{2.5} > C_0 \mu g/m^3$ |                  |                  |                |              |
|---------|--------------------------------|---------------------|--------------------------------------------------------------------|-------------------------|-------------------------|------------------------|-----------------------|------------------------------------------------------------------|------------------|------------------|----------------|--------------|
|         |                                |                     | $C_0 = 5$                                                          | $C_0 = 10$              | $C_0 = 15$              | $C_0 = 25$             | $C_0 = 35$            | $C_0 = 5$                                                        | $C_0 = 10$       | $C_0 = 15$       | $C_0 = 25$     | $C_0 = 35$   |
| JAM     | 673 (531, 815)                 | Xie et al. 2021     | 20.16<br>(7.24, 32.20)                                             | 14.52<br>(2.34, 27.19)  | 9.08<br>(0.52, 21.81)   | 2.40<br>(0.06, 11.64)  | 0.36<br>(0.02, 5.34)  | 136 (46, 232)                                                    | 98 (15, 195)     | 61 (4, 154)      | 16 (0, 81)     | 2 (0, 38)    |
| JOR     | 2,066 (1,431, 2,679)           | Age-specific curves | 43.17<br>(24.58, 58.14)                                            | 37.09<br>(20.90, 50.71) | 30.34<br>(16.95, 41.93) | 15.15<br>(8.96, 20.83) | 4.77<br>(3.27, 6.33)  | 892 (483, 1,343)                                                 | 766 (416, 1,169) | 627 (343, 965)   | 313 (174, 479) | 98 (59, 145) |
| JOR     | 2,066 (1,431, 2,679)           | All-ages curve      | 42.07<br>(23.42, 57.83)                                            | 35.95<br>(15.26, 53.29) | 29.14<br>(8.08, 48.22)  | 15.45<br>(1.56, 36.67) | 6.67<br>(0.30, 24.96) | 869 (402, 1,288)                                                 | 743 (258, 1,174) | 602 (161, 1,068) | 319 (38, 792)  | 138 (8, 534) |
| JOR     | 2,066 (1,431, 2,679)           | Zhang et al. 2021   | 24.71<br>(17.68, 30.65)                                            | 21.00<br>(13.59, 27.24) | 17.11<br>(9.33, 23.65)  | 8.99<br>(2.73, 15.98)  | 3.42<br>(0.48, 8.63)  | 511 (320, 687)                                                   | 434 (253, 598)   | 353 (178, 510)   | 186 (57, 331)  | 71 (10, 171) |
| JOR     | 2,066 (1,431, 2,679)           | Xie et al. 2021     | 33.05<br>(15.10, 48.56)                                            | 28.15<br>(9.01, 44.81)  | 22.87<br>(4.28, 40.77)  | 12.65<br>(0.79, 31.73) | 6.09<br>(0.19, 22.07) | 683 (308, 1,065)                                                 | 582 (176, 961)   | 472 (91, 853)    | 261 (17, 628)  | 126 (4, 419) |
| JPN     | 1,826 (1,766, 1,889)           | Age-specific curves | 15.16<br>(6.90, 24.07)                                             | 6.22<br>(2.79, 10.12)   | 0.52<br>(0.25, 0.87)    | 0.00<br>(0.00, 0.04)   | 0.00<br>(0.00, 0.00)  | 277 (123, 442)                                                   | 113 (50, 186)    | 10 (5, 16)       | 0 (0, 1)       | 0 (0, 0)     |
| JPN     | 1,826 (1,766, 1,889)           | All-ages curve      | 15.28<br>(3.61, 25.48)                                             | 7.25<br>(0.34, 17.71)   | 2.46<br>(0.03, 10.23)   | 0.74<br>(0.00, 2.44)   | 0.32<br>(0.00, 0.90)  | 279 (66, 476)                                                    | 132 (6, 331)     | 45 (0, 189)      | 14 (0, 45)     | 6 (0, 16)    |
| JPN     | 1,826 (1,766, 1,889)           | Zhang et al. 2021   | 7.72<br>(4.45, 10.63)                                              | 3.29<br>(0.74, 6.27)    | 0.53<br>(0.02, 2.32)    | 0.00<br>(0.00, 0.06)   | 0.00<br>(0.00, 0.00)  | 141 (81, 195)                                                    | 60 (13, 115)     | 10 (0, 42)       | 0 (0, 1)       | 0 (0, 0)     |
| JPN     | 1,826 (1,766, 1,889)           | Xie et al. 2021     | 10.69<br>(2.16, 19.46)                                             | 4.91<br>(0.18, 13.59)   | 1.79<br>(0.03, 7.98)    | 0.33<br>(0.00, 1.89)   | 0.10<br>(0.00, 0.53)  | 195 (40, 362)                                                    | 90 (3, 253)      | 33 (1, 149)      | 6 (0, 35)      | 2 (0, 10)    |
| KAZ     | 2,362 (2,169, 2,562)           | Age-specific curves | 29.50<br>(15.91, 41.49)                                            | 21.81<br>(11.77, 30.99) | 15.02<br>(8.20, 21.45)  | 5.15<br>(2.93, 7.46)   | 0.55<br>(0.36, 0.76)  | 697 (365, 994)                                                   | 515 (270, 744)   | 355 (188, 516)   | 122 (69, 177)  | 13 (8, 18)   |
| KAZ     | 2,362 (2,169, 2,562)           | All-ages curve      | 28.64<br>(13.04, 42.01)                                            | 21.31<br>(6.44, 35.93)  | 15.14<br>(2.66, 29.50)  | 6.51<br>(0.38, 18.87)  | 2.30<br>(0.06, 11.02) | 676 (301, 1,008)                                                 | 503 (151, 857)   | 358 (63, 704)    | 154 (9, 452)   | 54 (1, 262)  |
| KAZ     | 2,362 (2,169, 2,562)           | Zhang et al. 2021   | 15.93<br>(10.78, 20.33)                                            | 11.83<br>(6.72, 16.38)  | 8.23<br>(3.77, 12.49)   | 3.10<br>(0.52, 6.81)   | 0.62<br>(0.04, 2.58)  | 376 (254, 481)                                                   | 279 (160, 384)   | 194 (90, 291)    | 73 (13, 158)   | 15 (1, 61)   |

| IS<br>O     | Total number<br>of stillbirths | Method                     | Fraction of stillbirths attributable to $PM_{2.5} > C_0 \mu g/m^3$ |                            |                           |                          |                         | Number of stillbirths attributable to $PM_{2.5} > C_0 \mu g/m^3$ |                          |                         |                    |                    |
|-------------|--------------------------------|----------------------------|--------------------------------------------------------------------|----------------------------|---------------------------|--------------------------|-------------------------|------------------------------------------------------------------|--------------------------|-------------------------|--------------------|--------------------|
|             |                                |                            | $C_0 = 5$                                                          | $C_0 = 10$                 | $C_0 = 15$                | $C_0 = 25$               | $C_0 = 35$              | $C_0 = 5$                                                        | $C_0 = 10$               | $C_0 = 15$              | $C_0 = 25$         | $C_0 = 35$         |
| K<br>A<br>Z | 2,362 (2,169,<br>2,562)        | Xie et<br>al. 2021         | 21.61<br>(8.35,<br>34.00)                                          | 16.04<br>(3.77,<br>29.21)  | 11.22<br>(1.29,<br>24.19) | 4.70<br>(0.20,<br>15.71) | 1.81<br>(0.06,<br>8.98) | 510 (191,<br>816)                                                | 379 (85,<br>697)         | 265 (30,<br>579)        | 111 (5, 380)       | 43 (1, 220)        |
| K<br>E<br>N | 29,221<br>(25,724,<br>32,519)  | Age-<br>specific<br>curves | 27.37<br>(14.50,<br>39.78)                                         | 19.56<br>(10.26,<br>29.02) | 11.20<br>(5.90,<br>16.85) | 0.93<br>(0.52,<br>1.39)  | 0.00<br>(0.00,<br>0.00) | 7,998 (4,148,<br>11,718)                                         | 5,714 (2,928,<br>8,547)  | 3,274 (1,675,<br>4,974) | 271 (155,<br>415)  | 0 (0, 0)           |
| K<br>E<br>N | 29,221<br>(25,724,<br>32,519)  | All-ages<br>curve          | 27.01<br>(10.92,<br>40.37)                                         | 19.50<br>(3.61,<br>34.12)  | 12.05<br>(0.84,<br>27.21) | 3.32<br>(0.07,<br>14.03) | 1.00<br>(0.00,<br>5.99) | 7,893 (3,080,<br>12,535)                                         | 5,697 (1,018,<br>10,590) | 3,520 (237,<br>8,282)   | 969 (19,<br>4,140) | 293 (0,<br>1,786)  |
| K<br>E<br>N | 29,221<br>(25,724,<br>32,519)  | Zhang et<br>al. 2021       | 14.41<br>(9.61,<br>18.66)                                          | 10.16<br>(5.22,<br>14.64)  | 5.88<br>(1.76,<br>10.44)  | 0.76<br>(0.03,<br>3.23)  | 0.01<br>(0.00,<br>0.47) | 4,212 (2,676,<br>5,591)                                          | 2,968 (1,475,<br>4,395)  | 1,720 (497,<br>3,155)   | 221 (10,<br>987)   | 3 (0, 140)         |
| K<br>E<br>N | 29,221<br>(25,724,<br>32,519)  | Xie et<br>al. 2021         | 19.77<br>(7.06,<br>31.91)                                          | 13.96<br>(2.11,<br>26.93)  | 8.53<br>(0.54,<br>21.58)  | 2.37<br>(0.08,<br>11.36) | 0.60<br>(0.04,<br>4.75) | 5,777 (2,075,<br>9,382)                                          | 4,079 (622,<br>7,851)    | 2,492 (159,<br>6,316)   | 693 (25,<br>3,327) | 175 (12,<br>1,431) |
| K<br>G<br>Z | 1,226 (1,130,<br>1,319)        | Age-<br>specific<br>curves | 31.76<br>(17.02,<br>45.03)                                         | 24.37<br>(12.86,<br>35.27) | 16.24<br>(8.51,<br>23.94) | 1.83<br>(1.00,<br>2.75)  | 0.01<br>(0.01,<br>0.02) | 389 (203,<br>557)                                                | 299 (154,<br>436)        | 199 (102,<br>296)       | 22 (12, 34)        | 0 (0, 0)           |
| K<br>G<br>Z | 1,226 (1,130,<br>1,319)        | All-ages<br>curve          | 31.22<br>(13.77,<br>45.39)                                         | 24.16<br>(5.46,<br>39.71)  | 16.69<br>(1.51,<br>33.41) | 5.56<br>(0.12,<br>20.00) | 2.36<br>(0.01,<br>9.59) | 383 (164,<br>573)                                                | 296 (66,<br>506)         | 205 (18,<br>424)        | 68 (1, 247)        | 29 (0, 118)        |
| K<br>G<br>Z | 1,226 (1,130,<br>1,319)        | Zhang et<br>al. 2021       | 16.91<br>(11.50,<br>21.61)                                         | 12.80<br>(7.12,<br>17.73)  | 8.53<br>(3.00,<br>13.70)  | 1.52<br>(0.07,<br>5.72)  | 0.06<br>(0.00,<br>0.93) | 207 (140,<br>269)                                                | 157 (88,<br>221)         | 105 (38,<br>168)        | 19 (1, 69)         | 1 (0, 11)          |
| K<br>G<br>Z | 1,226 (1,130,<br>1,319)        | Xie et<br>al. 2021         | 23.12<br>(8.93,<br>36.25)                                          | 17.56<br>(3.15,<br>31.58)  | 11.82<br>(0.77,<br>26.53) | 3.73<br>(0.10,<br>16.07) | 1.27<br>(0.03,<br>7.79) | 283 (111,<br>448)                                                | 215 (40,<br>391)         | 145 (10,<br>330)        | 46 (1, 201)        | 16 (0, 98)         |
| K<br>H<br>M | 5,120 (2,849,<br>7,266)        | Age-<br>specific<br>curves | 22.62<br>(11.65,<br>33.60)                                         | 14.30<br>(7.22,<br>21.80)  | 5.09<br>(2.54,<br>7.93)   | 0.00<br>(0.00,<br>0.00)  | 0.00<br>(0.00,<br>0.00) | 1,158 (475,<br>1,997)                                            | 732 (295,<br>1,283)      | 261 (103,<br>467)       | 0 (0, 0)           | 0 (0, 0)           |
| K<br>H<br>M | 5,120 (2,849,<br>7,266)        | All-ages<br>curve          | 22.23<br>(7.66,<br>34.76)                                          | 13.99<br>(1.01,<br>28.00)  | 6.84<br>(0.13,<br>20.53)  | 0.70<br>(0.00,<br>6.98)  | 0.01<br>(0.00,<br>1.84) | 1,138 (276,<br>1,866)                                            | 716 (44,<br>1,456)       | 350 (6,<br>1,040)       | 36 (0, 348)        | 0 (0, 107)         |
| K<br>H<br>M | 5,120 (2,849,<br>7,266)        | Zhang et<br>al. 2021       | 11.61<br>(7.48,<br>15.35)                                          | 7.19<br>(2.93,<br>11.19)   | 2.69<br>(0.23,<br>6.82)   | 0.05<br>(0.00,<br>0.61)  | 0.00<br>(0.00,<br>0.02) | 595 (293,<br>943)                                                | 368 (124,<br>665)        | 138 (10,<br>376)        | 3 (0, 29)          | 0 (0, 1)           |

| IS<br>O     | Total number<br>of stillbirths | Method                     | Fraction of stillbirths attributable to $PM_{2.5} > C_0 \mu g/m^3$ |                            |                            |                            |                            | Number of stillbirths attributable to $PM_{2.5} > C_0 \mu g/m^3$ |                    |                   |                  |                  |
|-------------|--------------------------------|----------------------------|--------------------------------------------------------------------|----------------------------|----------------------------|----------------------------|----------------------------|------------------------------------------------------------------|--------------------|-------------------|------------------|------------------|
|             |                                |                            | $C_0 = 5$                                                          | $C_0 = 10$                 | $C_0 = 15$                 | $C_0 = 25$                 | $C_0 = 35$                 | $C_0 = 5$                                                        | $C_0 = 10$         | $C_0 = 15$        | $C_0 = 25$       | $C_0 = 35$       |
| K<br>H<br>M | 5,120 (2,849,<br>7,266)        | Xie et<br>al. 2021         | 15.97<br>(4.75,<br>26.99)                                          | 9.70<br>(0.73,<br>21.52)   | 4.26<br>(0.12,<br>15.53)   | 0.39<br>(0.00,<br>5.62)    | 0.05<br>(0.00,<br>1.67)    | 817 (188,<br>1,546)                                              | 497 (28,<br>1,190) | 218 (6, 828)      | 20 (0, 269)      | 3 (0, 83)        |
| K<br>N<br>A | 6 (3, 9)                       | Age-<br>specific<br>curves | 14.59<br>(7.12,<br>23.02)                                          | 5.53<br>(2.65,<br>8.99)    | 0.00<br>(0.00,<br>0.08)    | 0.00<br>(0.00,<br>0.10)    | 0.00<br>(0.00,<br>0.00)    | 1 (0, 2)                                                         | 0 (0, 1)           | 0 (0, 0)          | 0 (0, 0)         | 0 (0, 0)         |
| K<br>N<br>A | 6 (3, 9)                       | All-ages<br>curve          | 14.06<br>(3.06,<br>24.89)                                          | 5.56<br>(0.05,<br>16.97)   | 2.30<br>(0.00,<br>9.25)    | 0.32<br>(0.00,<br>2.12)    | 0.02<br>(0.00,<br>0.98)    | 1 (0, 2)                                                         | 0 (0, 1)           | 0 (0, 1)          | 0 (0, 0)         | 0 (0, 0)         |
| K<br>N<br>A | 6 (3, 9)                       | Zhang et<br>al. 2021       | 7.33<br>(4.30,<br>10.31)                                           | 2.64<br>(0.37,<br>5.86)    | 0.23<br>(0.00,<br>1.65)    | 0.00<br>(0.00,<br>0.01)    | 0.00<br>(0.00,<br>0.00)    | 0 (0, 1)                                                         | 0 (0, 0)           | 0 (0, 0)          | 0 (0, 0)         | 0 (0, 0)         |
| K<br>N<br>A | 6 (3, 9)                       | Xie et<br>al. 2021         | 10.69<br>(1.92,<br>19.01)                                          | 4.74<br>(0.14,<br>13.23)   | 1.36<br>(0.00,<br>7.38)    | 0.16<br>(0.00,<br>1.38)    | 0.00<br>(0.00,<br>0.60)    | 1 (0, 1)                                                         | 0 (0, 1)           | 0 (0, 0)          | 0 (0, 0)         | 0 (0, 0)         |
| K<br>O<br>R | 792 (760, 826)                 | Age-<br>specific<br>curves | 32.52<br>(16.46,<br>46.57)                                         | 25.36<br>(12.68,<br>37.14) | 17.43<br>(8.66,<br>26.03)  | 1.98<br>(1.03,<br>2.98)    | 0.00<br>(0.00,<br>0.00)    | 258 (132,<br>370)                                                | 201 (102,<br>295)  | 138 (69,<br>207)  | 16 (8, 24)       | 0 (0, 0)         |
| K<br>O<br>R | 792 (760, 826)                 | All-ages<br>curve          | 32.00<br>(15.12,<br>46.72)                                         | 24.56<br>(6.32,<br>41.26)  | 16.39<br>(1.73,<br>35.23)  | 4.60<br>(0.12,<br>21.63)   | 1.05<br>(0.00,<br>10.25)   | 253 (117,<br>375)                                                | 195 (50,<br>329)   | 130 (14,<br>279)  | 36 (1, 168)      | 8 (0, 81)        |
| K<br>O<br>R | 792 (760, 826)                 | Zhang et<br>al. 2021       | 17.64<br>(12.09,<br>22.44)                                         | 13.59<br>(7.78,<br>18.58)  | 9.34<br>(3.36,<br>14.57)   | 1.92<br>(0.07,<br>6.19)    | 0.14<br>(0.00,<br>1.01)    | 140 (95,<br>182)                                                 | 108 (61,<br>151)   | 74 (26, 119)      | 15 (1, 50)       | 1 (0, 8)         |
| K<br>O<br>R | 792 (760, 826)                 | Xie et<br>al. 2021         | 24.08<br>(9.56,<br>37.55)                                          | 18.61<br>(3.70,<br>33.01)  | 12.76<br>(0.84,<br>28.12)  | 3.57<br>(0.09,<br>17.23)   | 1.15<br>(0.03,<br>8.06)    | 191 (75,<br>296)                                                 | 147 (29,<br>261)   | 101 (7, 223)      | 28 (1, 139)      | 9 (0, 65)        |
| K<br>W<br>T | 368 (210, 525)                 | Age-<br>specific<br>curves | 66.08<br>(48.76,<br>77.87)                                         | 62.49<br>(47.27,<br>73.86) | 58.50<br>(44.24,<br>69.42) | 49.29<br>(34.91,<br>59.49) | 38.49<br>(25.13,<br>49.25) | 243 (114,<br>355)                                                | 230 (107,<br>337)  | 215 (101,<br>315) | 181 (86,<br>267) | 142 (60,<br>215) |
| K<br>W<br>T | 368 (210, 525)                 | All-ages<br>curve          | 61.34<br>(40.88,<br>74.36)                                         | 57.19<br>(34.43,<br>71.69) | 52.56<br>(27.24,<br>68.73) | 41.89<br>(12.32,<br>61.93) | 29.87<br>(4.47,<br>54.22)  | 226 (106,<br>324)                                                | 210 (90,<br>309)   | 193 (74,<br>293)  | 154 (43,<br>253) | 110 (16,<br>212) |
| K<br>W<br>T | 368 (210, 525)                 | Zhang et<br>al. 2021       | 44.38<br>(33.97,<br>52.50)                                         | 41.65<br>(30.72,<br>50.16) | 38.78<br>(27.30,<br>47.69) | 32.61<br>(19.96,<br>42.38) | 25.80<br>(11.89,<br>36.51) | 163 (79,<br>234)                                                 | 153 (74,<br>221)   | 143 (68,<br>207)  | 120 (53,<br>182) | 95 (35, 153)     |

| IS<br>O     | Total number<br>of stillbirths | Method              | Fraction of stillbirths attributable to $PM_{2.5} > C_0 \mu g/m^3$ |                         |                         |                        |                        | Number of stillbirths attributable to $PM_{2.5} > C_0 \mu g/m^3$ |                    |                  |                |               |
|-------------|--------------------------------|---------------------|--------------------------------------------------------------------|-------------------------|-------------------------|------------------------|------------------------|------------------------------------------------------------------|--------------------|------------------|----------------|---------------|
|             |                                |                     | $C_0 = 5$                                                          | $C_0 = 10$              | $C_0 = 15$              | $C_0 = 25$             | $C_0 = 35$             | $C_0 = 5$                                                        | $C_0 = 10$         | $C_0 = 15$       | $C_0 = 25$     | $C_0 = 35$    |
| K<br>W<br>T | 368 (210, 525)                 | Xie et al. 2021     | 56.58<br>(31.37, 73.99)                                            | 53.43<br>(26.35, 72.10) | 50.04<br>(20.93, 70.05) | 42.43<br>(9.89, 65.48) | 33.61<br>(3.42, 60.14) | 208 (75, 319)                                                    | 197 (64, 310)      | 184 (51, 300)    | 156 (30, 278)  | 124 (10, 254) |
| L<br>A<br>O | 3,124 (2,004, 4,202)           | Age-specific curves | 35.22<br>(19.48, 49.20)                                            | 28.21<br>(15.51, 40.16) | 20.43<br>(11.28, 29.51) | 5.69<br>(3.16, 8.33)   | 0.07<br>(0.05, 0.10)   | 1,100 (548, 1,733)                                               | 881 (436, 1,414)   | 638 (319, 1,039) | 178 (95, 289)  | 2 (1, 4)      |
| L<br>A<br>O | 3,124 (2,004, 4,202)           | All-ages curve      | 34.36<br>(16.57, 49.11)                                            | 27.32<br>(8.24, 43.63)  | 19.64<br>(2.94, 37.66)  | 7.61<br>(0.30, 24.66)  | 2.54<br>(0.01, 13.63)  | 1,073 (421, 1,787)                                               | 853 (204, 1,582)   | 613 (77, 1,334)  | 238 (9, 849)   | 79 (0, 437)   |
| L<br>A<br>O | 3,124 (2,004, 4,202)           | Zhang et al. 2021   | 19.13<br>(13.27, 24.23)                                            | 15.12<br>(9.00, 20.51)  | 10.91<br>(4.78, 16.59)  | 3.41<br>(0.40, 8.42)   | 0.44<br>(0.00, 2.61)   | 598 (329, 866)                                                   | 472 (238, 697)     | 341 (126, 527)   | 106 (11, 245)  | 14 (0, 78)    |
| L<br>A<br>O | 3,124 (2,004, 4,202)           | Xie et al. 2021     | 26.01<br>(10.69, 39.91)                                            | 20.65<br>(4.86, 35.50)  | 15.00<br>(1.66, 30.73)  | 5.88<br>(0.18, 20.34)  | 1.72<br>(0.07, 11.22)  | 813 (278, 1,397)                                                 | 645 (126, 1,242)   | 469 (41, 1,040)  | 184 (6, 692)   | 54 (2, 380)   |
| L<br>B<br>N | 768 (451, 1,089)               | Age-specific curves | 39.86<br>(22.53, 54.86)                                            | 33.49<br>(18.90, 46.91) | 26.44<br>(14.92, 37.58) | 10.67<br>(6.04, 15.40) | 0.43<br>(0.27, 0.62)   | 306 (149, 500)                                                   | 257 (124, 426)     | 203 (99, 341)    | 82 (41, 139)   | 3 (2, 6)      |
| L<br>B<br>N | 768 (451, 1,089)               | All-ages curve      | 39.51<br>(20.55, 54.91)                                            | 33.16<br>(12.00, 50.01) | 26.11<br>(4.99, 44.69)  | 12.34<br>(0.51, 32.34) | 4.48<br>(0.04, 20.53)  | 303 (128, 496)                                                   | 255 (79, 449)      | 201 (38, 394)    | 95 (4, 273)    | 34 (0, 175)   |
| L<br>B<br>N | 768 (451, 1,089)               | Zhang et al. 2021   | 22.46<br>(15.86, 28.09)                                            | 18.60<br>(11.72, 24.49) | 14.54<br>(7.40, 20.74)  | 6.16<br>(0.87, 12.76)  | 1.06<br>(0.01, 5.28)   | 172 (93, 259)                                                    | 143 (73, 220)      | 112 (50, 184)    | 47 (7, 109)    | 8 (0, 40)     |
| L<br>B<br>N | 768 (451, 1,089)               | Xie et al. 2021     | 30.25<br>(13.27, 45.36)                                            | 25.09<br>(7.08, 41.33)  | 19.54<br>(2.68, 36.97)  | 8.65<br>(0.33, 27.19)  | 2.65<br>(0.07, 17.09)  | 232 (93, 407)                                                    | 193 (57, 367)      | 150 (24, 330)    | 66 (3, 241)    | 20 (1, 144)   |
| L<br>B<br>R | 3,900 (2,352, 5,505)           | Age-specific curves | 34.45<br>(18.70, 48.78)                                            | 27.37<br>(14.69, 39.65) | 19.51<br>(10.42, 28.89) | 2.54<br>(1.39, 3.81)   | 0.00<br>(0.00, 0.00)   | 1,343 (619, 2,252)                                               | 1,067 (491, 1,826) | 761 (350, 1,323) | 99 (46, 174)   | 0 (0, 0)      |
| L<br>B<br>R | 3,900 (2,352, 5,505)           | All-ages curve      | 33.43<br>(15.87, 48.33)                                            | 26.19<br>(7.27, 42.83)  | 18.14<br>(2.04, 36.71)  | 4.78<br>(0.16, 22.84)  | 1.04<br>(0.00, 11.59)  | 1,304 (462, 2,303)                                               | 1,021 (229, 2,017) | 707 (74, 1,707)  | 187 (6, 1,059) | 40 (0, 505)   |
| L<br>B<br>R | 3,900 (2,352, 5,505)           | Zhang et al. 2021   | 18.50<br>(12.71, 23.47)                                            | 14.48<br>(8.39, 19.68)  | 10.26<br>(3.89, 15.70)  | 2.31<br>(0.07, 7.19)   | 0.14<br>(0.00, 1.31)   | 722 (396, 1,083)                                                 | 565 (261, 878)     | 400 (122, 664)   | 90 (2, 277)    | 6 (0, 47)     |

| IS<br>O     | Total number<br>of stillbirths | Method                     | Fraction of stillbirths attributable to $PM_{2.5} > C_0 \mu g/m^3$ |                            |                           |                          |                          | Number of stillbirths attributable to $PM_{2.5} > C_0 \mu g/m^3$ |                     |                    |              |             |
|-------------|--------------------------------|----------------------------|--------------------------------------------------------------------|----------------------------|---------------------------|--------------------------|--------------------------|------------------------------------------------------------------|---------------------|--------------------|--------------|-------------|
|             |                                |                            | $C_0 = 5$                                                          | $C_0 = 10$                 | $C_0 = 15$                | $C_0 = 25$               | $C_0 = 35$               | $C_0 = 5$                                                        | $C_0 = 10$          | $C_0 = 15$         | $C_0 = 25$   | $C_0 = 35$  |
| L<br>B<br>R | 3,900 (2,352,<br>5,505)        | Xie et<br>al. 2021         | 25.15<br>(10.25,<br>39.00)                                         | 19.66<br>(4.04,<br>34.52)  | 13.78<br>(0.98,<br>29.68) | 4.49<br>(0.14,<br>18.90) | 1.19<br>(0.03,<br>9.22)  | 981 (375,<br>1,737)                                              | 767 (162,<br>1,493) | 537 (41,<br>1,247) | 175 (6, 817) | 47 (1, 397) |
| L<br>B<br>Y | 1,249 (736,<br>1,796)          | Age-<br>specific<br>curves | 27.86<br>(14.66,<br>40.57)                                         | 20.15<br>(10.50,<br>29.93) | 11.61<br>(6.09,<br>17.33) | 2.50<br>(1.50,<br>3.52)  | 0.55<br>(0.36,<br>0.75)  | 348 (162,<br>578)                                                | 252 (117,<br>421)   | 145 (69,<br>244)   | 31 (17, 50)  | 7 (4, 11)   |
| L<br>B<br>Y | 1,249 (736,<br>1,796)          | All-ages<br>curve          | 27.58<br>(11.42,<br>40.96)                                         | 20.08<br>(4.07,<br>34.79)  | 12.82<br>(1.63,<br>27.96) | 3.87<br>(0.26,<br>14.18) | 1.20<br>(0.05,<br>6.17)  | 344 (115,<br>587)                                                | 251 (45,<br>486)    | 160 (17,<br>379)   | 48 (3, 191)  | 15 (1, 88)  |
| L<br>B<br>Y | 1,249 (736,<br>1,796)          | Zhang et<br>al. 2021       | 14.89<br>(9.95,<br>19.20)                                          | 10.69<br>(5.47,<br>15.23)  | 6.32<br>(2.03,<br>11.05)  | 1.54<br>(0.33,<br>3.73)  | 0.46<br>(0.03,<br>1.36)  | 186 (101,<br>279)                                                | 134 (60,<br>214)    | 79 (22, 153)       | 19 (4, 48)   | 6 (0, 18)   |
| L<br>B<br>Y | 1,249 (736,<br>1,796)          | Xie et<br>al. 2021         | 20.35<br>(7.50,<br>32.55)                                          | 14.57<br>(2.52,<br>27.61)  | 8.75<br>(0.86,<br>22.32)  | 2.78<br>(0.14,<br>11.81) | 0.79<br>(0.05,<br>5.67)  | 254 (76,<br>430)                                                 | 182 (27,<br>367)    | 109 (9, 297)       | 35 (2, 146)  | 10 (1, 67)  |
| L<br>C<br>A | 26 (23, 29)                    | Age-<br>specific<br>curves | 18.65<br>(9.51,<br>28.17)                                          | 9.84<br>(4.93,<br>15.28)   | 0.46<br>(0.23,<br>0.73)   | 0.00<br>(0.00,<br>0.03)  | 0.00<br>(0.00,<br>0.00)  | 5 (2, 7)                                                         | 3 (1, 4)            | 0 (0, 0)           | 0 (0, 0)     | 0 (0, 0)    |
| L<br>C<br>A | 26 (23, 29)                    | All-ages<br>curve          | 17.77<br>(5.26,<br>30.15)                                          | 8.77<br>(0.25,<br>23.19)   | 3.27<br>(0.00,<br>15.20)  | 0.79<br>(0.00,<br>4.91)  | 0.11<br>(0.00,<br>1.68)  | 5 (1, 8)                                                         | 2 (0, 6)            | 1 (0, 4)           | 0 (0, 1)     | 0 (0, 0)    |
| L<br>C<br>A | 26 (23, 29)                    | Zhang et<br>al. 2021       | 9.49<br>(5.78,<br>12.79)                                           | 5.07<br>(1.11,<br>8.54)    | 0.98<br>(0.00,<br>4.18)   | 0.00<br>(0.00,<br>0.10)  | 0.00<br>(0.00,<br>0.00)  | 2 (1, 3)                                                         | 1 (0, 2)            | 0 (0, 1)           | 0 (0, 0)     | 0 (0, 0)    |
| L<br>C<br>A | 26 (23, 29)                    | Xie et<br>al. 2021         | 13.44<br>(3.31,<br>22.86)                                          | 7.59<br>(0.30,<br>17.39)   | 2.60<br>(0.00,<br>11.22)  | 0.76<br>(0.00,<br>3.16)  | 0.63<br>(0.00,<br>1.23)  | 3 (1, 6)                                                         | 2 (0, 4)            | 1 (0, 3)           | 0 (0, 1)     | 0 (0, 0)    |
| L<br>K<br>A | 2,212 (2,096,<br>2,329)        | Age-<br>specific<br>curves | 33.45<br>(17.72,<br>48.24)                                         | 26.35<br>(13.81,<br>38.89) | 18.48<br>(9.63,<br>27.76) | 3.08<br>(1.65,<br>4.62)  | 0.00<br>(0.00,<br>0.00)  | 740 (384,<br>1,068)                                              | 583 (300,<br>860)   | 409 (211,<br>615)  | 68 (37, 103) | 0 (0, 0)    |
| L<br>K<br>A | 2,212 (2,096,<br>2,329)        | All-ages<br>curve          | 32.94<br>(15.10,<br>47.43)                                         | 25.91<br>(6.49,<br>41.93)  | 18.19<br>(1.83,<br>35.88) | 6.01<br>(0.17,<br>22.40) | 1.94<br>(0.01,<br>11.13) | 729 (330,<br>1,078)                                              | 573 (144,<br>950)   | 402 (40,<br>806)   | 133 (4, 499) | 43 (0, 248) |
| L<br>K<br>A | 2,212 (2,096,<br>2,329)        | Zhang et<br>al. 2021       | 18.06<br>(12.43,<br>22.96)                                         | 14.01<br>(8.13,<br>19.14)  | 9.75<br>(3.80,<br>15.17)  | 2.18<br>(0.15,<br>6.87)  | 0.13<br>(0.00,<br>1.46)  | 399 (272,<br>508)                                                | 310 (179,<br>424)   | 216 (83,<br>334)   | 48 (3, 153)  | 3 (0, 32)   |

| IS<br>O     | Total number<br>of stillbirths | Method                     | Fraction of stillbirths attributable to $PM_{2.5} > C_0 \mu g/m^3$ |                            |                            |                          |                          | Number of stillbirths attributable to $PM_{2.5} > C_0 \mu g/m^3$ |                         |                       |                   |             |
|-------------|--------------------------------|----------------------------|--------------------------------------------------------------------|----------------------------|----------------------------|--------------------------|--------------------------|------------------------------------------------------------------|-------------------------|-----------------------|-------------------|-------------|
|             |                                |                            | $C_0 = 5$                                                          | $C_0 = 10$                 | $C_0 = 15$                 | $C_0 = 25$               | $C_0 = 35$               | $C_0 = 5$                                                        | $C_0 = 10$              | $C_0 = 15$            | $C_0 = 25$        | $C_0 = 35$  |
| L<br>K<br>A | 2,212 (2,096,<br>2,329)        | Xie et<br>al. 2021         | 24.53<br>(9.82,<br>38.17)                                          | 18.94<br>(3.84,<br>33.58)  | 12.98<br>(1.00,<br>28.61)  | 4.26<br>(0.14,<br>17.88) | 1.37<br>(0.05,<br>8.94)  | 543 (218,<br>843)                                                | 419 (85,<br>743)        | 287 (23,<br>635)      | 94 (3, 400)       | 30 (1, 192) |
| L<br>S<br>O | 1,701 (1,231,<br>2,132)        | Age-<br>specific<br>curves | 35.27<br>(19.17,<br>49.83)                                         | 28.35<br>(15.31,<br>40.90) | 20.69<br>(11.14,<br>30.38) | 4.53<br>(2.46,<br>6.71)  | 0.00<br>(0.00,<br>0.00)  | 600 (287,<br>925)                                                | 482 (228,<br>757)       | 352 (166,<br>561)     | 77 (38, 123)      | 0 (0, 0)    |
| L<br>S<br>O | 1,701 (1,231,<br>2,132)        | All-ages<br>curve          | 34.49<br>(16.94,<br>49.59)                                         | 27.31<br>(8.14,<br>44.34)  | 19.38<br>(2.63,<br>38.53)  | 6.34<br>(0.29,<br>25.44) | 1.45<br>(0.01,<br>13.74) | 587 (259,<br>915)                                                | 465 (117,<br>826)       | 330 (37,<br>716)      | 108 (4, 449)      | 25 (0, 237) |
| L<br>S<br>O | 1,701 (1,231,<br>2,132)        | Zhang et<br>al. 2021       | 19.25<br>(13.32,<br>24.35)                                         | 15.28<br>(9.05,<br>20.61)  | 11.10<br>(4.65,<br>16.68)  | 3.17<br>(0.20,<br>8.33)  | 0.26<br>(0.00,<br>2.03)  | 327 (195,<br>470)                                                | 260 (135,<br>389)       | 189 (71,<br>306)      | 54 (3, 151)       | 4 (0, 36)   |
| L<br>S<br>O | 1,701 (1,231,<br>2,132)        | Xie et<br>al. 2021         | 26.09<br>(10.80,<br>40.22)                                         | 20.65<br>(4.73,<br>35.86)  | 14.82<br>(1.29,<br>31.15)  | 4.94<br>(0.15,<br>20.70) | 1.47<br>(0.06,<br>11.08) | 444 (165,<br>749)                                                | 351 (74,<br>671)        | 252 (20,<br>577)      | 84 (2, 379)       | 25 (1, 192) |
| M<br>A<br>R | 10,999 (8,737,<br>13,350)      | Age-<br>specific<br>curves | 27.45<br>(14.81,<br>40.41)                                         | 19.61<br>(10.45,<br>29.61) | 11.07<br>(5.82,<br>17.05)  | 0.31<br>(0.18,<br>0.49)  | 0.00<br>(0.00,<br>0.00)  | 3,019 (1,510,<br>4,555)                                          | 2,157 (1,066,<br>3,309) | 1,218 (597,<br>1,892) | 34 (19, 54)       | 0 (0, 0)    |
| M<br>A<br>R | 10,999 (8,737,<br>13,350)      | All-ages<br>curve          | 26.45<br>(11.02,<br>40.23)                                         | 18.35<br>(3.59,<br>33.99)  | 10.22<br>(0.76,<br>27.06)  | 1.99<br>(0.03,<br>13.64) | 0.39<br>(0.00,<br>5.53)  | 2,910 (1,098,<br>4,979)                                          | 2,018 (358,<br>4,167)   | 1,124 (79,<br>3,298)  | 218 (3,<br>1,628) | 42 (0, 657) |
| M<br>A<br>R | 10,999 (8,737,<br>13,350)      | Zhang et<br>al. 2021       | 14.34<br>(9.53,<br>18.57)                                          | 10.10<br>(5.12,<br>14.53)  | 5.78<br>(1.54,<br>10.31)   | 0.64<br>(0.01,<br>2.88)  | 0.02<br>(0.00,<br>0.28)  | 1,577 (1,031,<br>2,116)                                          | 1,111 (562,<br>1,646)   | 636 (157,<br>1,148)   | 71 (1, 323)       | 3 (0, 31)   |
| M<br>A<br>R | 10,999 (8,737,<br>13,350)      | Xie et<br>al. 2021         | 19.69<br>(7.05,<br>31.77)                                          | 13.85<br>(2.04,<br>26.77)  | 8.14<br>(0.42,<br>21.39)   | 1.50<br>(0.07,<br>10.80) | 0.44<br>(0.02,<br>4.29)  | 2,165 (714,<br>3,715)                                            | 1,523 (202,<br>3,088)   | 895 (43,<br>2,463)    | 165 (7,<br>1,234) | 48 (2, 459) |
| M<br>D<br>G | 13,999 (9,395,<br>18,294)      | Age-<br>specific<br>curves | 18.38<br>(9.72,<br>27.18)                                          | 10.11<br>(5.30,<br>15.23)  | 3.72<br>(1.96,<br>5.69)    | 0.00<br>(0.00,<br>0.05)  | 0.00<br>(0.00,<br>0.00)  | 2,574 (1,253,<br>4,038)                                          | 1,416 (684,<br>2,258)   | 521 (251,<br>837)     | 0 (0, 8)          | 0 (0, 0)    |
| M<br>D<br>G | 13,999 (9,395,<br>18,294)      | All-ages<br>curve          | 17.67<br>(5.81,<br>29.09)                                          | 9.71<br>(1.22,<br>21.76)   | 4.34<br>(0.22,<br>14.80)   | 0.52<br>(0.00,<br>5.42)  | 0.08<br>(0.00,<br>1.83)  | 2,473 (677,<br>4,616)                                            | 1,360 (131,<br>3,435)   | 607 (24,<br>2,240)    | 72 (0, 777)       | 11 (0, 281) |
| M<br>D<br>G | 13,999 (9,395,<br>18,294)      | Zhang et<br>al. 2021       | 9.38<br>(5.76,<br>12.62)                                           | 5.22<br>(2.03,<br>8.40)    | 2.13<br>(0.32,<br>4.71)    | 0.15<br>(0.00,<br>0.70)  | 0.01<br>(0.00,<br>0.04)  | 1,313 (752,<br>2,038)                                            | 731 (265,<br>1,329)     | 298 (42,<br>723)      | 22 (0, 97)        | 1 (0, 7)    |



| IS<br>O     | Total number<br>of stillbirths | Method                     | Fraction of stillbirths attributable to $PM_{2.5} > C_0 \mu g/m^3$ |                            |                            |                            |                           | Number of stillbirths attributable to $PM_{2.5} > C_0 \mu g/m^3$ |                         |                         |                            |                       |
|-------------|--------------------------------|----------------------------|--------------------------------------------------------------------|----------------------------|----------------------------|----------------------------|---------------------------|------------------------------------------------------------------|-------------------------|-------------------------|----------------------------|-----------------------|
|             |                                |                            | $C_0 = 5$                                                          | $C_0 = 10$                 | $C_0 = 15$                 | $C_0 = 25$                 | $C_0 = 35$                | $C_0 = 5$                                                        | $C_0 = 10$              | $C_0 = 15$              | $C_0 = 25$                 | $C_0 = 35$            |
| M<br>D<br>G | 13,999 (9,395,<br>18,294)      | Xie et<br>al. 2021         | 12.96<br>(3.68,<br>22.48)                                          | 7.27<br>(0.64,<br>16.85)   | 3.20<br>(0.08,<br>11.47)   | 0.46<br>(0.02,<br>4.09)    | 0.21<br>(0.00,<br>1.18)   | 1,814 (480,<br>3,565)                                            | 1,018 (90,<br>2,656)    | 448 (13,<br>1,758)      | 65 (3, 600)                | 29 (0, 188)           |
| M<br>D<br>V | 48 (40, 56)                    | Age-<br>specific<br>curves | 25.98<br>(13.53,<br>37.69)                                         | 18.01<br>(9.28,<br>26.57)  | 11.17<br>(5.72,<br>16.73)  | 0.73<br>(0.41,<br>1.11)    | 0.00<br>(0.00,<br>0.00)   | 12 (7, 19)                                                       | 9 (5, 13)               | 5 (3, 8)                | 0 (0, 1)                   | 0 (0, 0)              |
| M<br>D<br>V | 48 (40, 56)                    | All-ages<br>curve          | 24.63<br>(10.37,<br>38.30)                                         | 16.93<br>(3.68,<br>31.99)  | 11.12<br>(0.76,<br>25.37)  | 2.35<br>(0.00,<br>14.13)   | 0.35<br>(0.00,<br>6.88)   | 12 (5, 19)                                                       | 8 (2, 15)               | 5 (0, 12)               | 1 (0, 7)                   | 0 (0, 3)              |
| M<br>D<br>V | 48 (40, 56)                    | Zhang et<br>al. 2021       | 13.51<br>(8.99,<br>17.80)                                          | 9.20<br>(4.88,<br>13.81)   | 5.63<br>(1.83,<br>9.88)    | 0.34<br>(0.00,<br>3.83)    | 0.00<br>(0.00,<br>0.60)   | 6 (4, 9)                                                         | 4 (2, 7)                | 3 (1, 5)                | 0 (0, 2)                   | 0 (0, 0)              |
| M<br>D<br>V | 48 (40, 56)                    | Xie et<br>al. 2021         | 18.74<br>(6.52,<br>30.08)                                          | 13.11<br>(2.21,<br>25.01)  | 8.78<br>(0.24,<br>20.09)   | 2.29<br>(0.00,<br>11.36)   | 0.53<br>(0.00,<br>5.41)   | 9 (3, 15)                                                        | 6 (1, 12)               | 4 (0, 10)               | 1 (0, 5)                   | 0 (0, 3)              |
| M<br>E<br>X | 15,333<br>(12,827,<br>17,931)  | Age-<br>specific<br>curves | 24.51<br>(12.82,<br>35.68)                                         | 16.85<br>(8.75,<br>24.99)  | 9.73<br>(5.10,<br>14.66)   | 0.64<br>(0.38,<br>0.98)    | 0.00<br>(0.00,<br>0.00)   | 3,759 (2,038,<br>5,685)                                          | 2,583 (1,386,<br>3,970) | 1,491 (799,<br>2,328)   | 98 (56, 156)               | 0 (0, 0)              |
| M<br>E<br>X | 15,333<br>(12,827,<br>17,931)  | All-ages<br>curve          | 23.91<br>(9.84,<br>36.61)                                          | 16.26<br>(3.44,<br>29.99)  | 9.54<br>(0.87,<br>23.39)   | 2.16<br>(0.08,<br>11.97)   | 0.47<br>(0.00,<br>5.15)   | 3,666 (1,410,<br>5,815)                                          | 2,494 (499,<br>4,705)   | 1,462 (125,<br>3,633)   | 330 (11,<br>1,803)         | 73 (0, 772)           |
| M<br>E<br>X | 15,333<br>(12,827,<br>17,931)  | Zhang et<br>al. 2021       | 12.92<br>(8.48,<br>16.86)                                          | 8.83<br>(4.51,<br>12.85)   | 5.19<br>(1.54,<br>9.04)    | 0.76<br>(0.02,<br>2.88)    | 0.04<br>(0.00,<br>0.42)   | 1,982 (1,248,<br>2,718)                                          | 1,354 (664,<br>2,041)   | 796 (228,<br>1,413)     | 116 (3, 452)               | 5 (0, 64)             |
| M<br>E<br>X | 15,333<br>(12,827,<br>17,931)  | Xie et<br>al. 2021         | 17.71<br>(6.22,<br>28.98)                                          | 12.09<br>(1.82,<br>23.87)  | 7.13<br>(0.39,<br>18.77)   | 1.75<br>(0.08,<br>9.77)    | 0.52<br>(0.03,<br>3.98)   | 2,716 (961,<br>4,506)                                            | 1,853 (291,<br>3,705)   | 1,093 (59,<br>2,892)    | 268 (11,<br>1,478)         | 80 (4, 615)           |
| M<br>LI     | 16,163<br>(14,357,<br>18,095)  | Age-<br>specific<br>curves | 49.31<br>(30.27,<br>64.08)                                         | 43.84<br>(26.69,<br>57.66) | 37.77<br>(23.12,<br>50.21) | 23.84<br>(15.67,<br>32.13) | 8.87<br>(6.01,<br>11.54)  | 7,970 (4,908,<br>10,506)                                         | 7,085 (4,352,<br>9,494) | 6,105 (3,714,<br>8,288) | 3,853<br>(2,438,<br>5,234) | 1,433 (949,<br>1,943) |
| M<br>LI     | 16,163<br>(14,357,<br>18,095)  | All-ages<br>curve          | 47.71<br>(27.94,<br>64.10)                                         | 42.02<br>(20.21,<br>60.24) | 35.65<br>(12.06,<br>55.93) | 21.64<br>(2.63,<br>46.03)  | 11.00<br>(0.59,<br>34.94) | 7,712 (4,149,<br>10,397)                                         | 6,791 (3,052,<br>9,685) | 5,762 (1,844,<br>8,983) | 3,498 (424,<br>7,264)      | 1,778 (98,<br>5,359)  |
| M<br>LI     | 16,163<br>(14,357,<br>18,095)  | Zhang et<br>al. 2021       | 29.11<br>(21.25,<br>35.70)                                         | 25.60<br>(17.39,<br>32.51) | 21.91<br>(13.34,<br>29.17) | 13.96<br>(5.10,<br>21.97)  | 6.35<br>(0.93,<br>14.12)  | 4,705 (3,330,<br>5,956)                                          | 4,137 (2,719,<br>5,409) | 3,541 (2,099,<br>4,862) | 2,256 (807,<br>3,688)      | 1,026 (144,<br>2,349) |

| IS<br>O     | Total number<br>of stillbirths | Method                     | Fraction of stillbirths attributable to $PM_{2.5} > C_0 \mu g/m^3$ |                            |                            |                            |                           | Number of stillbirths attributable to $PM_{2.5} > C_0 \mu g/m^3$ |                         |                         |                            |                      |
|-------------|--------------------------------|----------------------------|--------------------------------------------------------------------|----------------------------|----------------------------|----------------------------|---------------------------|------------------------------------------------------------------|-------------------------|-------------------------|----------------------------|----------------------|
|             |                                |                            | $C_0 = 5$                                                          | $C_0 = 10$                 | $C_0 = 15$                 | $C_0 = 25$                 | $C_0 = 35$                | $C_0 = 5$                                                        | $C_0 = 10$              | $C_0 = 15$              | $C_0 = 25$                 | $C_0 = 35$           |
| M<br>L<br>I | 16,163<br>(14,357,<br>18,095)  | Xie et<br>al. 2021         | 38.63<br>(18.64,<br>55.14)                                         | 34.18<br>(12.70,<br>51.83) | 29.37<br>(7.11,<br>48.25)  | 18.68<br>(1.59,<br>40.20)  | 9.54<br>(0.41,<br>30.94)  | 6,245 (2,850,<br>9,005)                                          | 5,524 (1,921,<br>8,483) | 4,746 (1,061,<br>7,884) | 3,020 (237,<br>6,492)      | 1,541 (64,<br>4,889) |
| M<br>M<br>R | 14,461 (8,373,<br>20,212)      | Age-<br>specific<br>curves | 44.48<br>(25.72,<br>59.65)                                         | 38.48<br>(22.01,<br>52.39) | 31.82<br>(18.10,<br>43.81) | 16.87<br>(10.16,<br>23.48) | 3.71<br>(2.53,<br>4.87)   | 6,432 (3,167,<br>9,840)                                          | 5,565 (2,708,<br>8,560) | 4,601 (2,214,<br>7,126) | 2,440<br>(1,187,<br>3,842) | 536 (275,<br>821)    |
| M<br>M<br>R | 14,461 (8,373,<br>20,212)      | All-ages<br>curve          | 43.09<br>(24.11,<br>58.97)                                         | 37.03<br>(15.96,<br>54.52) | 30.30<br>(8.33,<br>49.55)  | 16.30<br>(1.57,<br>38.22)  | 7.14<br>(0.31,<br>26.48)  | 6,231 (2,321,<br>10,057)                                         | 5,354 (1,649,<br>9,004) | 4,381 (925,<br>7,964)   | 2,357 (181,<br>5,874)      | 1,032 (36,<br>3,924) |
| M<br>M<br>R | 14,461 (8,373,<br>20,212)      | Zhang et<br>al. 2021       | 25.35<br>(18.22,<br>31.42)                                         | 21.63<br>(14.20,<br>28.04) | 17.74<br>(10.01,<br>24.48) | 9.55<br>(2.67,<br>16.89)   | 3.10<br>(0.45,<br>9.13)   | 3,665 (1,860,<br>5,154)                                          | 3,128 (1,485,<br>4,520) | 2,565 (1,095,<br>3,841) | 1,381 (311,<br>2,521)      | 448 (53,<br>1,268)   |
| M<br>M<br>R | 14,461 (8,373,<br>20,212)      | Xie et<br>al. 2021         | 33.96<br>(15.64,<br>49.66)                                         | 29.19<br>(9.60,<br>45.99)  | 24.06<br>(4.64,<br>42.02)  | 13.47<br>(0.90,<br>33.12)  | 6.06<br>(0.23,<br>23.33)  | 4,912 (1,927,<br>8,062)                                          | 4,221 (1,194,<br>7,212) | 3,480 (585,<br>6,577)   | 1,948 (123,<br>4,991)      | 876 (32,<br>3,381)   |
| M<br>N<br>G | 445 (402, 487)                 | Age-<br>specific<br>curves | 42.99<br>(28.44,<br>54.66)                                         | 36.80<br>(25.12,<br>46.51) | 30.35<br>(21.12,<br>38.08) | 21.27<br>(14.65,<br>26.36) | 15.38<br>(9.10,<br>20.61) | 191 (127,<br>245)                                                | 164 (111,<br>209)       | 135 (95,<br>170)        | 95 (64, 121)               | 68 (41, 95)          |
| M<br>N<br>G | 445 (402, 487)                 | All-ages<br>curve          | 41.55<br>(24.05,<br>54.26)                                         | 35.21<br>(17.86,<br>49.35) | 29.14<br>(13.12,<br>43.95) | 20.43<br>(5.80,<br>33.94)  | 13.97<br>(2.07,<br>26.50) | 185 (107,<br>244)                                                | 157 (81,<br>222)        | 130 (59,<br>198)        | 91 (27, 153)               | 62 (10, 121)         |
| M<br>N<br>G | 445 (402, 487)                 | Zhang et<br>al. 2021       | 27.74<br>(20.47,<br>33.66)                                         | 24.17<br>(16.62,<br>30.39) | 20.67<br>(13.44,<br>27.00) | 15.50<br>(9.25,<br>21.20)  | 11.92<br>(5.51,<br>17.33) | 123 (89,<br>155)                                                 | 108 (72,<br>139)        | 92 (59, 123)            | 69 (41, 95)                | 53 (25, 77)          |
| M<br>N<br>G | 445 (402, 487)                 | Xie et<br>al. 2021         | 35.98<br>(17.94,<br>50.27)                                         | 31.29<br>(13.16,<br>46.63) | 26.78<br>(9.99,<br>42.74)  | 20.52<br>(4.76,<br>35.37)  | 15.77<br>(1.64,<br>29.93) | 160 (77,<br>230)                                                 | 139 (57,<br>212)        | 119 (42,<br>193)        | 91 (20, 160)               | 70 (7, 135)          |
| M<br>O<br>Z | 25,838<br>(20,272,<br>30,912)  | Age-<br>specific<br>curves | 24.78<br>(13.48,<br>35.92)                                         | 16.59<br>(8.91,<br>24.61)  | 8.12<br>(4.31,<br>12.24)   | 0.05<br>(0.03,<br>0.09)    | 0.00<br>(0.00,<br>0.00)   | 6,401 (3,063,<br>9,946)                                          | 4,287 (2,027,<br>6,805) | 2,098 (989,<br>3,370)   | 14 (8, 25)                 | 0 (0, 0)             |
| M<br>O<br>Z | 25,838<br>(20,272,<br>30,912)  | All-ages<br>curve          | 24.17<br>(9.07,<br>37.04)                                          | 16.27<br>(2.33,<br>30.42)  | 9.00<br>(0.40,<br>23.24)   | 2.32<br>(0.03,<br>10.24)   | 0.84<br>(0.00,<br>3.95)   | 6,244 (2,132,<br>10,240)                                         | 4,203 (553,<br>8,279)   | 2,326 (92,<br>6,090)    | 601 (7,<br>2,523)          | 216 (0, 957)         |
| M<br>O<br>Z | 25,838<br>(20,272,<br>30,912)  | Zhang et<br>al. 2021       | 12.81<br>(8.36,<br>16.73)                                          | 8.50<br>(3.98,<br>12.60)   | 4.35<br>(1.01,<br>8.34)    | 0.30<br>(0.00,<br>1.97)    | 0.01<br>(0.00,<br>0.15)   | 3,310 (2,021,<br>4,625)                                          | 2,196 (955,<br>3,426)   | 1,124 (244,<br>2,264)   | 78 (1, 504)                | 2 (0, 41)            |

| IS<br>O     | Total number<br>of stillbirths | Method                     | Fraction of stillbirths attributable to $PM_{2.5} > C_0 \mu g/m^3$ |                            |                            |                            |                            | Number of stillbirths attributable to $PM_{2.5} > C_0 \mu g/m^3$ |                         |                       |                       |                     |
|-------------|--------------------------------|----------------------------|--------------------------------------------------------------------|----------------------------|----------------------------|----------------------------|----------------------------|------------------------------------------------------------------|-------------------------|-----------------------|-----------------------|---------------------|
|             |                                |                            | $C_0 = 5$                                                          | $C_0 = 10$                 | $C_0 = 15$                 | $C_0 = 25$                 | $C_0 = 35$                 | $C_0 = 5$                                                        | $C_0 = 10$              | $C_0 = 15$            | $C_0 = 25$            | $C_0 = 35$          |
| M<br>O<br>Z | 25,838<br>(20,272,<br>30,912)  | Xie et<br>al. 2021         | 17.61<br>(5.81,<br>28.99)                                          | 11.66<br>(1.41,<br>23.77)  | 6.50<br>(0.26,<br>18.04)   | 1.56<br>(0.04,<br>8.33)    | 0.49<br>(0.02,<br>3.22)    | 4,549 (1,258,<br>7,626)                                          | 3,013 (287,<br>6,052)   | 1,680 (57,<br>4,535)  | 404 (11,<br>1,997)    | 127 (4, 771)        |
| M<br>R<br>T | 3,374 (1,925,<br>4,765)        | Age-<br>specific<br>curves | 58.89<br>(39.55,<br>72.40)                                         | 54.46<br>(36.60,<br>67.50) | 49.55<br>(33.43,<br>62.07) | 38.24<br>(26.90,<br>48.08) | 25.12<br>(17.02,<br>31.99) | 1,987 (1,009,<br>2,972)                                          | 1,838 (925,<br>2,768)   | 1,672 (845,<br>2,531) | 1,290 (669,<br>1,962) | 847 (421,<br>1,308) |
| M<br>R<br>T | 3,374 (1,925,<br>4,765)        | All-ages<br>curve          | 56.26<br>(34.11,<br>70.04)                                         | 51.75<br>(26.94,<br>66.85) | 46.73<br>(18.98,<br>63.30) | 35.23<br>(6.01,<br>55.25)  | 22.91<br>(1.58,<br>46.28)  | 1,898 (945,<br>2,697)                                            | 1,746 (728,<br>2,512)   | 1,577 (571,<br>2,363) | 1,189 (190,<br>2,044) | 773 (50,<br>1,653)  |
| M<br>R<br>T | 3,374 (1,925,<br>4,765)        | Zhang et<br>al. 2021       | 37.19<br>(27.86,<br>44.75)                                         | 34.08<br>(24.30,<br>42.03) | 30.82<br>(20.55,<br>39.18) | 23.79<br>(12.49,<br>33.04) | 16.03<br>(4.48,<br>26.26)  | 1,255 (673,<br>1,833)                                            | 1,150 (596,<br>1,703)   | 1,040 (475,<br>1,578) | 803 (328,<br>1,309)   | 541 (133,<br>1,020) |
| M<br>R<br>T | 3,374 (1,925,<br>4,765)        | Xie et<br>al. 2021         | 48.37<br>(25.24,<br>65.89)                                         | 44.61<br>(19.77,<br>63.38) | 40.54<br>(13.87,<br>60.67) | 31.41<br>(4.45,<br>54.57)  | 21.22<br>(1.13,<br>47.45)  | 1,632 (547,<br>2,558)                                            | 1,505 (442,<br>2,426)   | 1,368 (324,<br>2,302) | 1,060 (145,<br>1,988) | 716 (34,<br>1,671)  |
| M<br>U<br>S | 132 (124, 140)                 | Age-<br>specific<br>curves | 18.03<br>(9.06,<br>27.46)                                          | 9.35<br>(4.61,<br>14.63)   | 1.13<br>(0.57,<br>1.81)    | 0.00<br>(0.00,<br>0.04)    | 0.00<br>(0.00,<br>0.00)    | 24 (12, 36)                                                      | 12 (6, 19)              | 1 (1, 2)              | 0 (0, 0)              | 0 (0, 0)            |
| M<br>U<br>S | 132 (124, 140)                 | All-ages<br>curve          | 17.55<br>(5.27,<br>29.08)                                          | 9.06<br>(0.62,<br>22.11)   | 2.13<br>(0.03,<br>14.24)   | 0.07<br>(0.00,<br>4.02)    | 0.00<br>(0.00,<br>1.29)    | 23 (7, 40)                                                       | 12 (1, 30)              | 3 (0, 19)             | 0 (0, 5)              | 0 (0, 2)            |
| M<br>U<br>S | 132 (124, 140)                 | Zhang et<br>al. 2021       | 9.37<br>(5.53,<br>12.41)                                           | 5.16<br>(1.25,<br>8.12)    | 1.59<br>(0.02,<br>3.80)    | 0.04<br>(0.00,<br>0.12)    | 0.00<br>(0.00,<br>0.00)    | 12 (7, 17)                                                       | 7 (2, 11)               | 2 (0, 5)              | 0 (0, 0)              | 0 (0, 0)            |
| M<br>U<br>S | 132 (124, 140)                 | Xie et<br>al. 2021         | 12.54<br>(3.34,<br>22.03)                                          | 6.20<br>(0.33,<br>16.15)   | 2.32<br>(0.01,<br>10.24)   | 0.42<br>(0.00,<br>2.64)    | 0.01<br>(0.00,<br>0.83)    | 17 (4, 30)                                                       | 8 (0, 22)               | 3 (0, 14)             | 1 (0, 4)              | 0 (0, 1)            |
| M<br>W<br>I | 10,561<br>(10,081,<br>11,066)  | Age-<br>specific<br>curves | 29.20<br>(15.63,<br>42.06)                                         | 21.55<br>(11.37,<br>31.80) | 13.06<br>(6.83,<br>19.73)  | 0.20<br>(0.11,<br>0.31)    | 0.00<br>(0.00,<br>0.00)    | 3,084 (1,617,<br>4,443)                                          | 2,276 (1,171,<br>3,362) | 1,380 (700,<br>2,086) | 21 (12, 32)           | 0 (0, 0)            |
| M<br>W<br>I | 10,561<br>(10,081,<br>11,066)  | All-ages<br>curve          | 28.56<br>(11.81,<br>42.54)                                         | 21.00<br>(3.62,<br>36.71)  | 12.77<br>(0.55,<br>30.26)  | 2.38<br>(0.02,<br>15.78)   | 0.35<br>(0.00,<br>5.64)    | 3,016 (1,219,<br>4,550)                                          | 2,218 (365,<br>3,896)   | 1,348 (59,<br>3,206)  | 252 (2,<br>1,653)     | 37 (0, 582)         |
| M<br>W<br>I | 10,561<br>(10,081,<br>11,066)  | Zhang et<br>al. 2021       | 15.33<br>(10.31,<br>19.75)                                         | 11.13<br>(5.86,<br>15.80)  | 6.71<br>(1.69,<br>11.68)   | 0.54<br>(0.01,<br>3.38)    | 0.00<br>(0.00,<br>0.25)    | 1,619 (1,090,<br>2,100)                                          | 1,175 (621,<br>1,676)   | 709 (178,<br>1,222)   | 57 (1, 359)           | 0 (0, 26)           |

| IS<br>O     | Total number<br>of stillbirths | Method                     | Fraction of stillbirths attributable to $PM_{2.5} > C_0 \mu g/m^3$ |                            |                            |                            |                            | Number of stillbirths attributable to $PM_{2.5} > C_0 \mu g/m^3$ |                              |                              |                             |                             |
|-------------|--------------------------------|----------------------------|--------------------------------------------------------------------|----------------------------|----------------------------|----------------------------|----------------------------|------------------------------------------------------------------|------------------------------|------------------------------|-----------------------------|-----------------------------|
|             |                                |                            | $C_0 = 5$                                                          | $C_0 = 10$                 | $C_0 = 15$                 | $C_0 = 25$                 | $C_0 = 35$                 | $C_0 = 5$                                                        | $C_0 = 10$                   | $C_0 = 15$                   | $C_0 = 25$                  | $C_0 = 35$                  |
| M<br>W<br>I | 10,561<br>(10,081,<br>11,066)  | Xie et<br>al. 2021         | 20.88<br>(7.69,<br>33.49)                                          | 14.93<br>(2.03,<br>28.58)  | 8.84<br>(0.41,<br>23.34)   | 1.96<br>(0.03,<br>12.21)   | 0.59<br>(0.00,<br>4.68)    | 2,205 (791,<br>3,564)                                            | 1,577 (206,<br>3,045)        | 934 (43,<br>2,486)           | 207 (3,<br>1,308)           | 63 (0, 491)                 |
| M<br>Y<br>S | 2,369 (2,296,<br>2,446)        | Age-<br>specific<br>curves | 31.60<br>(16.59,<br>45.98)                                         | 24.34<br>(12.67,<br>36.14) | 16.45<br>(8.55,<br>24.74)  | 3.37<br>(1.82,<br>5.08)    | 0.00<br>(0.00,<br>0.00)    | 749 (392,<br>1,095)                                              | 577 (299,<br>861)            | 390 (202,<br>590)            | 80 (43, 121)                | 0 (0, 0)                    |
| M<br>Y<br>S | 2,369 (2,296,<br>2,446)        | All-ages<br>curve          | 30.95<br>(14.27,<br>45.32)                                         | 23.42<br>(6.30,<br>39.56)  | 15.68<br>(1.75,<br>33.18)  | 4.97<br>(0.15,<br>20.15)   | 1.20<br>(0.00,<br>10.10)   | 733 (335,<br>1,074)                                              | 555 (148,<br>934)            | 372 (41,<br>782)             | 118 (3, 472)                | 28 (0, 237)                 |
| M<br>Y<br>S | 2,369 (2,296,<br>2,446)        | Zhang et<br>al. 2021       | 17.06<br>(11.67,<br>21.78)                                         | 12.93<br>(7.37,<br>17.91)  | 8.73<br>(3.45,<br>13.88)   | 2.08<br>(0.14,<br>6.20)    | 0.17<br>(0.00,<br>1.44)    | 404 (274,<br>519)                                                | 306 (173,<br>428)            | 207 (82,<br>331)             | 49 (3, 147)                 | 4 (0, 34)                   |
| M<br>Y<br>S | 2,369 (2,296,<br>2,446)        | Xie et<br>al. 2021         | 23.13<br>(9.08,<br>36.42)                                          | 17.37<br>(3.43,<br>31.73)  | 11.51<br>(0.91,<br>26.67)  | 3.32<br>(0.14,<br>16.13)   | 0.91<br>(0.04,<br>7.69)    | 548 (212,<br>867)                                                | 411 (80,<br>757)             | 273 (22,<br>635)             | 79 (3, 384)                 | 22 (1, 184)                 |
| N<br>A<br>M | 1,083 (615,<br>1,526)          | Age-<br>specific<br>curves | 22.85<br>(11.89,<br>33.66)                                         | 14.54<br>(7.48,<br>21.84)  | 6.58<br>(3.42,<br>9.97)    | 0.34<br>(0.20,<br>0.53)    | 0.00<br>(0.00,<br>0.00)    | 247 (116,<br>415)                                                | 157 (73,<br>268)             | 71 (33, 123)                 | 4 (2, 7)                    | 0 (0, 0)                    |
| N<br>A<br>M | 1,083 (615,<br>1,526)          | All-ages<br>curve          | 22.13<br>(8.25,<br>34.66)                                          | 13.81<br>(2.27,<br>27.69)  | 7.15<br>(0.46,<br>20.22)   | 1.31<br>(0.03,<br>8.59)    | 0.32<br>(0.00,<br>3.25)    | 240 (80,<br>445)                                                 | 150 (24,<br>351)             | 77 (5, 254)                  | 14 (0, 104)                 | 4 (0, 39)                   |
| N<br>A<br>M | 1,083 (615,<br>1,526)          | Zhang et<br>al. 2021       | 11.82<br>(7.61,<br>15.60)                                          | 7.45<br>(3.33,<br>11.45)   | 3.63<br>(0.83,<br>7.21)    | 0.42<br>(0.01,<br>1.65)    | 0.02<br>(0.00,<br>0.21)    | 128 (58,<br>194)                                                 | 81 (27, 138)                 | 39 (8, 81)                   | 5 (0, 18)                   | 0 (0, 2)                    |
| N<br>A<br>M | 1,083 (615,<br>1,526)          | Xie et<br>al. 2021         | 16.27<br>(5.27,<br>27.14)                                          | 10.25<br>(1.22,<br>21.77)  | 5.01<br>(0.23,<br>16.12)   | 1.03<br>(0.05,<br>7.07)    | 0.40<br>(0.01,<br>2.57)    | 176 (46,<br>346)                                                 | 111 (12,<br>274)             | 54 (3, 201)                  | 11 (1, 78)                  | 4 (0, 29)                   |
| N<br>E<br>R | 19,860<br>(14,872,<br>25,676)  | Age-<br>specific<br>curves | 65.68<br>(50.15,<br>76.77)                                         | 62.00<br>(47.25,<br>72.79) | 57.92<br>(43.55,<br>68.32) | 48.61<br>(35.06,<br>58.77) | 38.03<br>(25.37,<br>49.41) | 13,044<br>(8,803,<br>17,469)                                     | 12,313<br>(8,404,<br>16,617) | 11,504<br>(7,760,<br>15,627) | 9,654<br>(6,326,<br>13,559) | 7,554<br>(4,603,<br>10,914) |
| N<br>E<br>R | 19,860<br>(14,872,<br>25,676)  | All-ages<br>curve          | 63.76<br>(44.36,<br>75.76)                                         | 59.88<br>(38.38,<br>73.17) | 55.56<br>(31.73,<br>70.28) | 45.65<br>(18.61,<br>63.65) | 34.64<br>(9.13,<br>56.16)  | 12,663<br>(8,423,<br>17,680)                                     | 11,892<br>(7,487,<br>16,965) | 11,035<br>(6,234,<br>16,072) | 9,066<br>(3,541,<br>14,249) | 6,880<br>(1,685,<br>12,421) |
| N<br>E<br>R | 19,860<br>(14,872,<br>25,676)  | Zhang et<br>al. 2021       | 49.76<br>(38.95,<br>57.95)                                         | 47.29<br>(35.94,<br>55.87) | 44.68<br>(32.78,<br>53.69) | 39.07<br>(25.97,<br>48.98) | 32.88<br>(18.64,<br>43.79) | 9,883 (6,867,<br>13,054)                                         | 9,391 (6,322,<br>12,512)     | 8,874 (5,764,<br>11,943)     | 7,759<br>(4,619,<br>10,749) | 6,530<br>(3,426,<br>9,553)  |

| IS<br>O     | Total number<br>of stillbirths  | Method                     | Fraction of stillbirths attributable to $PM_{2.5} > C_0 \mu g/m^3$ |                            |                            |                            |                            | Number of stillbirths attributable to $PM_{2.5} > C_0 \mu g/m^3$ |                                |                                |                                |                                |
|-------------|---------------------------------|----------------------------|--------------------------------------------------------------------|----------------------------|----------------------------|----------------------------|----------------------------|------------------------------------------------------------------|--------------------------------|--------------------------------|--------------------------------|--------------------------------|
|             |                                 |                            | $C_0 = 5$                                                          | $C_0 = 10$                 | $C_0 = 15$                 | $C_0 = 25$                 | $C_0 = 35$                 | $C_0 = 5$                                                        | $C_0 = 10$                     | $C_0 = 15$                     | $C_0 = 25$                     | $C_0 = 35$                     |
| N<br>E<br>R | 19,860<br>(14,872,<br>25,676)   | Xie et<br>al. 2021         | 62.02<br>(36.37,<br>78.23)                                         | 59.25<br>(31.71,<br>76.62) | 56.26<br>(26.69,<br>74.89) | 49.55<br>(16.49,<br>71.01) | 41.81<br>(8.94,<br>66.47)  | 12,316<br>(6,515,<br>17,789)                                     | 11,766<br>(5,615,<br>17,309)   | 11,173<br>(4,904,<br>16,794)   | 9,842<br>(3,040,<br>15,765)    | 8,303<br>(1,629,<br>14,555)    |
| N<br>G<br>A | 166,992<br>(99,540,<br>235,302) | Age-<br>specific<br>curves | 59.88<br>(43.06,<br>72.06)                                         | 55.57<br>(40.85,<br>66.92) | 50.78<br>(37.25,<br>61.26) | 39.90<br>(29.30,<br>47.78) | 28.00<br>(19.80,<br>35.26) | 99,994<br>(54,743,<br>148,284)                                   | 92,790<br>(50,873,<br>137,375) | 84,799<br>(47,634,<br>125,598) | 66,631<br>(37,663,<br>96,570)  | 46,756<br>(25,889,<br>69,960)  |
| N<br>G<br>A | 166,992<br>(99,540,<br>235,302) | All-ages<br>curve          | 58.11<br>(38.51,<br>70.82)                                         | 53.72<br>(31.99,<br>67.71) | 48.85<br>(25.68,<br>64.25) | 37.96<br>(15.69,<br>56.34) | 27.45<br>(8.07,<br>47.56)  | 97,033<br>(54,340,<br>145,650)                                   | 89,701<br>(48,113,<br>137,165) | 81,578<br>(38,758,<br>126,879) | 63,385<br>(24,915,<br>106,519) | 45,846<br>(14,162,<br>86,991)  |
| N<br>G<br>A | 166,992<br>(99,540,<br>235,302) | Zhang et<br>al. 2021       | 44.00<br>(34.31,<br>51.41)                                         | 41.23<br>(31.06,<br>49.01) | 38.33<br>(27.66,<br>46.48) | 32.12<br>(20.70,<br>41.06) | 25.75<br>(15.43,<br>35.19) | 73,481<br>(42,751,<br>104,110)                                   | 68,858<br>(39,330,<br>98,763)  | 64,003<br>(36,155,<br>92,846)  | 53,640<br>(28,355,<br>79,592)  | 43,003<br>(21,490,<br>64,953)  |
| N<br>G<br>A | 166,992<br>(99,540,<br>235,302) | Xie et<br>al. 2021         | 54.91<br>(31.73,<br>70.32)                                         | 51.61<br>(26.71,<br>68.15) | 48.06<br>(21.72,<br>65.81) | 40.33<br>(14.36,<br>60.57) | 32.93<br>(9.31,<br>54.57)  | 91,690<br>(43,120,<br>139,801)                                   | 86,188<br>(39,290,<br>134,415) | 80,263<br>(32,192,<br>129,730) | 67,343<br>(21,665,<br>118,567) | 54,985<br>(14,249,<br>105,416) |
| NI<br>C     | 1,588 (1,179,<br>2,038)         | Age-<br>specific<br>curves | 27.27<br>(14.34,<br>39.40)                                         | 19.50<br>(10.09,<br>28.80) | 10.91<br>(5.61,<br>16.37)  | 1.11<br>(0.63,<br>1.65)    | 0.00<br>(0.00,<br>0.00)    | 433 (220,<br>674)                                                | 310 (156,<br>492)              | 173 (86,<br>279)               | 18 (10, 28)                    | 0 (0, 0)                       |
| NI<br>C     | 1,588 (1,179,<br>2,038)         | All-ages<br>curve          | 26.87<br>(11.04,<br>40.41)                                         | 19.04<br>(3.55,<br>34.17)  | 11.53<br>(0.96,<br>27.26)  | 3.06<br>(0.03,<br>13.55)   | 0.94<br>(0.00,<br>5.53)    | 427 (170,<br>763)                                                | 302 (58,<br>629)               | 183 (16,<br>492)               | 49 (0, 226)                    | 15 (0, 93)                     |
| NI<br>C     | 1,588 (1,179,<br>2,038)         | Zhang et<br>al. 2021       | 14.45<br>(9.66,<br>18.73)                                          | 10.20<br>(5.24,<br>14.73)  | 5.80<br>(1.71,<br>10.52)   | 0.87<br>(0.03,<br>3.17)    | 0.03<br>(0.00,<br>0.48)    | 230 (140,<br>335)                                                | 162 (77,<br>260)               | 92 (25, 185)                   | 14 (0, 52)                     | 0 (0, 9)                       |
| NI<br>C     | 1,588 (1,179,<br>2,038)         | Xie et<br>al. 2021         | 19.98<br>(7.11,<br>31.96)                                          | 14.31<br>(2.12,<br>26.98)  | 8.60<br>(0.55,<br>21.71)   | 2.39<br>(0.09,<br>11.22)   | 0.50<br>(0.03,<br>4.77)    | 317 (108,<br>561)                                                | 227 (30,<br>466)               | 137 (8, 366)                   | 38 (1, 179)                    | 8 (1, 80)                      |
| N<br>P<br>L | 11,217 (8,709,<br>13,806)       | Age-<br>specific<br>curves | 52.79<br>(34.81,<br>66.42)                                         | 47.71<br>(31.91,<br>60.47) | 42.07<br>(28.12,<br>53.95) | 29.34<br>(20.48,<br>37.37) | 17.61<br>(10.41,<br>23.63) | 5,922 (3,586,<br>7,945)                                          | 5,351 (3,252,<br>7,269)        | 4,720 (2,916,<br>6,485)        | 3,291<br>(2,044,<br>4,527)     | 1,975<br>(1,119,<br>2,924)     |
| N<br>P<br>L | 11,217 (8,709,<br>13,806)       | All-ages<br>curve          | 52.36<br>(31.78,<br>66.01)                                         | 47.19<br>(24.58,<br>62.38) | 41.44<br>(17.52,<br>58.34) | 29.14<br>(7.36,<br>49.08)  | 18.54<br>(2.52,<br>39.10)  | 5,873 (3,390,<br>8,240)                                          | 5,294 (2,696,<br>7,695)        | 4,649 (2,066,<br>7,140)        | 3,269 (847,<br>5,917)          | 2,080 (294,<br>4,603)          |
| N<br>P<br>L | 11,217 (8,709,<br>13,806)       | Zhang et<br>al. 2021       | 35.14<br>(26.34,<br>42.26)                                         | 31.92<br>(22.71,<br>39.40) | 28.54<br>(18.89,<br>36.40) | 21.37<br>(11.58,<br>29.94) | 14.78<br>(6.28,<br>23.17)  | 3,942 (2,613,<br>5,035)                                          | 3,580 (2,251,<br>4,634)        | 3,201 (1,934,<br>4,230)        | 2,397<br>(1,177,<br>3,387)     | 1,657 (644,<br>2,525)          |

| IS<br>O     | Total number<br>of stillbirths   | Method                     | Fraction of stillbirths attributable to $PM_{2.5} > C_0 \mu\text{g}/\text{m}^3$ |                            |                            |                            |                            | Number of stillbirths attributable to $PM_{2.5} > C_0 \mu\text{g}/\text{m}^3$ |                                 |                                 |                                |                               |
|-------------|----------------------------------|----------------------------|---------------------------------------------------------------------------------|----------------------------|----------------------------|----------------------------|----------------------------|-------------------------------------------------------------------------------|---------------------------------|---------------------------------|--------------------------------|-------------------------------|
|             |                                  |                            | $C_0 = 5$                                                                       | $C_0 = 10$                 | $C_0 = 15$                 | $C_0 = 25$                 | $C_0 = 35$                 | $C_0 = 5$                                                                     | $C_0 = 10$                      | $C_0 = 15$                      | $C_0 = 25$                     | $C_0 = 35$                    |
| N<br>P<br>L | 11,217 (8,709,<br>13,806)        | Xie et<br>al. 2021         | 45.54<br>(23.76,<br>62.10)                                                      | 41.54<br>(18.26,<br>59.32) | 37.23<br>(13.07,<br>56.33) | 27.96<br>(5.67,<br>49.60)  | 19.74<br>(2.08,<br>42.16)  | 5,108 (2,445,<br>7,635)                                                       | 4,659 (1,887,<br>7,226)         | 4,176 (1,368,<br>6,773)         | 3,136 (612,<br>5,915)          | 2,214 (228,<br>4,898)         |
| O<br>M<br>N | 476 (444, 507)                   | Age-<br>specific<br>curves | 54.95<br>(34.85,<br>69.21)                                                      | 50.20<br>(31.46,<br>63.78) | 44.93<br>(28.08,<br>57.40) | 32.80<br>(21.65,<br>42.78) | 18.79<br>(12.51,<br>24.63) | 262 (166,<br>333)                                                             | 239 (152,<br>308)               | 214 (135,<br>278)               | 156 (103,<br>202)              | 89 (60, 115)                  |
| O<br>M<br>N | 476 (444, 507)                   | All-ages<br>curve          | 53.00<br>(31.84,<br>67.89)                                                      | 47.98<br>(24.58,<br>64.43) | 42.39<br>(16.60,<br>60.58) | 29.65<br>(4.74,<br>51.75)  | 17.32<br>(1.21,<br>41.84)  | 252 (153,<br>324)                                                             | 228 (119,<br>307)               | 202 (80,<br>289)                | 141 (23,<br>246)               | 82 (6, 199)                   |
| O<br>M<br>N | 476 (444, 507)                   | Zhang et<br>al. 2021       | 34.00<br>(25.20,<br>41.17)                                                      | 30.75<br>(21.49,<br>38.27) | 27.34<br>(17.61,<br>35.22) | 19.99<br>(9.34,<br>28.65)  | 12.08<br>(2.65,<br>21.41)  | 162 (118,<br>197)                                                             | 146 (101,<br>183)               | 130 (83,<br>169)                | 95 (45, 138)                   | 58 (13, 103)                  |
| O<br>M<br>N | 476 (444, 507)                   | Xie et<br>al. 2021         | 44.49<br>(22.60,<br>61.74)                                                      | 40.40<br>(16.94,<br>58.94) | 35.99<br>(11.01,<br>55.91) | 26.09<br>(2.97,<br>49.12)  | 15.91<br>(0.80,<br>41.21)  | 212 (105,<br>296)                                                             | 192 (79,<br>282)                | 171 (51,<br>268)                | 124 (14,<br>234)               | 76 (4, 196)                   |
| P<br>A<br>K | 197,845<br>(174,271,<br>222,807) | Age-<br>specific<br>curves | 59.77<br>(43.82,<br>72.05)                                                      | 55.45<br>(40.04,<br>67.30) | 50.70<br>(36.70,<br>61.87) | 40.01<br>(27.64,<br>50.00) | 28.53<br>(17.92,<br>38.56) | 118,251<br>(82,448,<br>151,782)                                               | 109,696<br>(76,666,<br>141,738) | 100,300<br>(71,998,<br>129,452) | 79,150<br>(54,824,<br>103,524) | 56,436<br>(34,023,<br>78,325) |
| P<br>A<br>K | 197,845<br>(174,271,<br>222,807) | All-ages<br>curve          | 58.78<br>(38.69,<br>71.50)                                                      | 54.35<br>(32.19,<br>68.47) | 49.45<br>(25.19,<br>65.12) | 38.49<br>(12.37,<br>57.52) | 27.26<br>(5.10,<br>49.20)  | 116,284<br>(77,533,<br>147,195)                                               | 107,526<br>(64,343,<br>140,224) | 97,841<br>(50,150,<br>132,804)  | 76,153<br>(23,960,<br>115,834) | 53,936<br>(9,803,<br>97,312)  |
| P<br>A<br>K | 197,845<br>(174,271,<br>222,807) | Zhang et<br>al. 2021       | 42.65<br>(32.68,<br>50.46)                                                      | 39.82<br>(29.37,<br>48.01) | 36.87<br>(25.92,<br>45.45) | 30.57<br>(18.72,<br>39.99) | 23.93<br>(11.82,<br>34.09) | 84,384<br>(63,453,<br>104,477)                                                | 78,784<br>(57,252,<br>99,226)   | 72,938<br>(50,628,<br>93,733)   | 60,487<br>(36,534,<br>82,561)  | 47,335<br>(23,227,<br>69,971) |
| P<br>A<br>K | 197,845<br>(174,271,<br>222,807) | Xie et<br>al. 2021         | 54.26<br>(30.11,<br>71.01)                                                      | 50.94<br>(25.08,<br>68.89) | 47.38<br>(19.86,<br>66.61) | 39.60<br>(10.42,<br>61.55) | 31.23<br>(4.42,<br>55.78)  | 107,346<br>(57,315,<br>141,092)                                               | 100,778<br>(47,351,<br>136,086) | 93,747<br>(37,610,<br>131,179)  | 78,346<br>(19,889,<br>120,401) | 61,787<br>(8,525,<br>108,512) |
| P<br>A<br>N | 669 (375, 957)                   | Age-<br>specific<br>curves | 22.09<br>(11.42,<br>32.75)                                                      | 13.71<br>(6.96,<br>20.85)  | 4.53<br>(2.28,<br>7.06)    | 0.00<br>(0.00,<br>0.01)    | 0.00<br>(0.00,<br>0.00)    | 148 (65,<br>250)                                                              | 92 (40, 157)                    | 30 (13, 52)                     | 0 (0, 0)                       | 0 (0, 0)                      |
| P<br>A<br>N | 669 (375, 957)                   | All-ages<br>curve          | 21.40<br>(7.56,<br>34.21)                                                       | 12.77<br>(1.18,<br>27.47)  | 5.68<br>(0.07,<br>20.16)   | 0.96<br>(0.00,<br>7.22)    | 0.35<br>(0.00,<br>2.29)    | 143 (41,<br>277)                                                              | 85 (7, 213)                     | 38 (0, 147)                     | 6 (0, 50)                      | 2 (0, 17)                     |
| P<br>A<br>N | 669 (375, 957)                   | Zhang et<br>al. 2021       | 11.43<br>(7.26,<br>15.12)                                                       | 7.13<br>(2.70,<br>10.84)   | 2.88<br>(0.15,<br>6.39)    | 0.01<br>(0.00,<br>0.44)    | 0.00<br>(0.00,<br>0.02)    | 76 (38, 116)                                                                  | 48 (15, 80)                     | 19 (1, 49)                      | 0 (0, 3)                       | 0 (0, 0)                      |

| IS<br>O     | Total number<br>of stillbirths | Method              | Fraction of stillbirths attributable to $PM_{2.5} > C_0 \mu g/m^3$ |                            |                            |                          |                          | Number of stillbirths attributable to $PM_{2.5} > C_0 \mu g/m^3$ |                         |                         |                    |                   |
|-------------|--------------------------------|---------------------|--------------------------------------------------------------------|----------------------------|----------------------------|--------------------------|--------------------------|------------------------------------------------------------------|-------------------------|-------------------------|--------------------|-------------------|
|             |                                |                     | $C_0 = 5$                                                          | $C_0 = 10$                 | $C_0 = 15$                 | $C_0 = 25$               | $C_0 = 35$               | $C_0 = 5$                                                        | $C_0 = 10$              | $C_0 = 15$              | $C_0 = 25$         | $C_0 = 35$        |
| P<br>A<br>N | 669 (375, 957)                 | Xie et al. 2021     | 15.95<br>(4.80,<br>26.52)                                          | 10.11<br>(0.65,<br>21.24)  | 4.76<br>(0.08,<br>15.63)   | 0.38<br>(0.00,<br>5.27)  | 0.24<br>(0.00,<br>1.46)  | 107 (27,<br>189)                                                 | 68 (4, 142)             | 32 (0, 98)              | 3 (0, 32)          | 2 (0, 9)          |
| P<br>E<br>R | 4,508 (3,837,<br>5,159)        | Age-specific curves | 34.51<br>(19.14,<br>48.26)                                         | 27.50<br>(15.20,<br>39.04) | 20.02<br>(11.05,<br>28.65) | 7.14<br>(4.08,<br>10.15) | 1.06<br>(0.69,<br>1.48)  | 1,556 (840,<br>2,107)                                            | 1,239 (667,<br>1,706)   | 902 (485,<br>1,262)     | 322 (178,<br>454)  | 48 (31, 65)       |
| P<br>E<br>R | 4,508 (3,837,<br>5,159)        | All-ages curve      | 33.50<br>(16.54,<br>47.99)                                         | 26.43<br>(8.97,<br>42.47)  | 19.12<br>(4.01,<br>36.45)  | 7.91<br>(0.61,<br>24.25) | 2.82<br>(0.12,<br>14.56) | 1,510 (707,<br>2,309)                                            | 1,192 (387,<br>2,054)   | 862 (174,<br>1,757)     | 357 (28,<br>1,163) | 127 (5, 703)      |
| P<br>E<br>R | 4,508 (3,837,<br>5,159)        | Zhang et al. 2021   | 18.90<br>(13.10,<br>23.90)                                         | 14.93<br>(8.92,<br>20.17)  | 10.92<br>(5.15,<br>16.32)  | 4.30<br>(0.84,<br>9.01)  | 1.02<br>(0.03,<br>3.69)  | 852 (554,<br>1,108)                                              | 673 (387,<br>931)       | 492 (227,<br>745)       | 194 (39,<br>408)   | 46 (1, 174)       |
| P<br>E<br>R | 4,508 (3,837,<br>5,159)        | Xie et al. 2021     | 25.58<br>(10.60,<br>39.20)                                         | 20.25<br>(5.17,<br>34.76)  | 14.95<br>(2.00,<br>30.03)  | 6.51<br>(0.26,<br>20.43) | 2.17<br>(0.10,<br>12.18) | 1,153 (490,<br>1,746)                                            | 913 (241,<br>1,524)     | 674 (93,<br>1,304)      | 293 (12,<br>867)   | 98 (5, 526)       |
| P<br>H<br>L | 25,416<br>(20,367,<br>30,749)  | Age-specific curves | 29.94<br>(16.14,<br>42.92)                                         | 22.31<br>(11.92,<br>32.69) | 14.07<br>(7.50,<br>20.99)  | 1.20<br>(0.66,<br>1.79)  | 0.00<br>(0.00,<br>0.00)  | 7,608 (4,295,<br>11,680)                                         | 5,670 (3,169,<br>8,869) | 3,577 (1,996,<br>5,705) | 304 (176,<br>488)  | 0 (0, 0)          |
| P<br>H<br>L | 25,416<br>(20,367,<br>30,749)  | All-ages curve      | 28.92<br>(12.67,<br>42.92)                                         | 21.23<br>(4.95,<br>36.93)  | 13.42<br>(1.26,<br>30.31)  | 3.60<br>(0.07,<br>16.98) | 0.83<br>(0.00,<br>7.62)  | 7,350 (3,127,<br>11,718)                                         | 5,395 (1,235,<br>9,881) | 3,410 (312,<br>7,971)   | 916 (17,<br>4,430) | 211 (0,<br>2,000) |
| P<br>H<br>L | 25,416<br>(20,367,<br>30,749)  | Zhang et al. 2021   | 15.78<br>(10.65,<br>20.25)                                         | 11.63<br>(6.29,<br>16.31)  | 7.43<br>(2.49,<br>12.19)   | 1.33<br>(0.04,<br>4.55)  | 0.08<br>(0.00,<br>0.67)  | 4,011 (2,579,<br>5,453)                                          | 2,955 (1,556,<br>4,277) | 1,889 (601,<br>3,165)   | 337 (11,<br>1,152) | 20 (0, 161)       |
| P<br>H<br>L | 25,416<br>(20,367,<br>30,749)  | Xie et al. 2021     | 21.59<br>(8.17,<br>34.24)                                          | 15.94<br>(2.84,<br>29.43)  | 10.25<br>(0.67,<br>24.27)  | 2.55<br>(0.07,<br>13.86) | 0.62<br>(0.03,<br>6.17)  | 5,488 (2,007,<br>8,842)                                          | 4,051 (769,<br>7,524)   | 2,606 (186,<br>6,184)   | 647 (18,<br>3,396) | 158 (8,<br>1,445) |
| P<br>N<br>G | 3,844 (2,329,<br>5,533)        | Age-specific curves | 19.62<br>(10.40,<br>29.43)                                         | 10.78<br>(5.63,<br>16.58)  | 2.54<br>(1.31,<br>3.97)    | 0.00<br>(0.00,<br>0.03)  | 0.00<br>(0.00,<br>0.00)  | 754 (380,<br>1,353)                                              | 415 (207,<br>756)       | 98 (49, 180)            | 0 (0, 1)           | 0 (0, 0)          |
| P<br>N<br>G | 3,844 (2,329,<br>5,533)        | All-ages curve      | 19.29<br>(5.70,<br>30.62)                                          | 11.24<br>(0.77,<br>23.33)  | 4.74<br>(0.09,<br>15.56)   | 1.35<br>(0.00,<br>4.84)  | 0.66<br>(0.00,<br>1.55)  | 741 (170,<br>1,435)                                              | 432 (22,<br>1,069)      | 182 (3, 689)            | 52 (0, 205)        | 25 (0, 61)        |
| P<br>N<br>G | 3,844 (2,329,<br>5,533)        | Zhang et al. 2021   | 9.88<br>(6.09,<br>13.22)                                           | 5.46<br>(1.77,<br>8.94)    | 1.65<br>(0.12,<br>4.61)    | 0.02<br>(0.00,<br>0.29)  | 0.00<br>(0.00,<br>0.01)  | 380 (190,<br>642)                                                | 210 (63,<br>419)        | 63 (5, 204)             | 1 (0, 12)          | 0 (0, 0)          |

| IS<br>O     | Total number<br>of stillbirths | Method                     | Fraction of stillbirths attributable to $PM_{2.5} > C_0 \mu g/m^3$ |                            |                            |                           |                          | Number of stillbirths attributable to $PM_{2.5} > C_0 \mu g/m^3$ |                     |                     |                    |              |
|-------------|--------------------------------|----------------------------|--------------------------------------------------------------------|----------------------------|----------------------------|---------------------------|--------------------------|------------------------------------------------------------------|---------------------|---------------------|--------------------|--------------|
|             |                                |                            | $C_0 = 5$                                                          | $C_0 = 10$                 | $C_0 = 15$                 | $C_0 = 25$                | $C_0 = 35$               | $C_0 = 5$                                                        | $C_0 = 10$          | $C_0 = 15$          | $C_0 = 25$         | $C_0 = 35$   |
| P<br>N<br>G | 3,844 (2,329,<br>5,533)        | Xie et<br>al. 2021         | 13.61<br>(3.55,<br>23.58)                                          | 7.53<br>(0.47,<br>17.98)   | 3.22<br>(0.09,<br>12.12)   | 0.63<br>(0.00,<br>3.82)   | 0.17<br>(0.00,<br>1.04)  | 523 (142,<br>1,005)                                              | 290 (18,<br>741)    | 124 (3, 473)        | 24 (0, 148)        | 6 (0, 41)    |
| P<br>R<br>K | 3,285 (2,019,<br>4,605)        | Age-<br>specific<br>curves | 36.41<br>(18.15,<br>52.59)                                         | 30.07<br>(15.11,<br>44.23) | 23.06<br>(11.68,<br>34.38) | 9.12<br>(5.19,<br>13.44)  | 1.57<br>(1.02,<br>2.15)  | 1,196 (514,<br>1,988)                                            | 988 (426,<br>1,662) | 757 (331,<br>1,280) | 300 (142,<br>494)  | 51 (27, 82)  |
| P<br>R<br>K | 3,285 (2,019,<br>4,605)        | All-ages<br>curve          | 36.98<br>(18.91,<br>52.12)                                         | 30.22<br>(10.67,<br>47.01) | 22.78<br>(4.87,<br>41.33)  | 10.35<br>(0.74,<br>28.80) | 3.93<br>(0.12,<br>17.67) | 1,215 (455,<br>2,006)                                            | 993 (292,<br>1,787) | 748 (148,<br>1,503) | 340 (22,<br>1,025) | 129 (3, 635) |
| P<br>R<br>K | 3,285 (2,019,<br>4,605)        | Zhang et<br>al. 2021       | 21.04<br>(14.78,<br>26.42)                                         | 17.13<br>(10.57,<br>22.79) | 13.02<br>(6.34,<br>18.97)  | 5.44<br>(1.19,<br>11.01)  | 1.40<br>(0.08,<br>4.93)  | 691 (382,<br>1,041)                                              | 563 (286,<br>879)   | 428 (182,<br>722)   | 179 (35,<br>395)   | 46 (2, 156)  |
| P<br>R<br>K | 3,285 (2,019,<br>4,605)        | Xie et<br>al. 2021         | 28.38<br>(12.15,<br>42.86)                                         | 23.13<br>(6.18,<br>38.66)  | 17.53<br>(2.52,<br>34.13)  | 8.12<br>(0.41,<br>24.15)  | 3.16<br>(0.11,<br>15.13) | 932 (371,<br>1,569)                                              | 760 (181,<br>1,406) | 576 (69,<br>1,230)  | 267 (12,<br>837)   | 104 (4, 501) |
| P<br>R<br>Y | 1,652 (1,127,<br>2,097)        | Age-<br>specific<br>curves | 18.56<br>(9.34,<br>28.10)                                          | 9.82<br>(4.85,<br>15.28)   | 0.87<br>(0.44,<br>1.38)    | 0.00<br>(0.00,<br>0.03)   | 0.00<br>(0.00,<br>0.00)  | 307 (144,<br>502)                                                | 162 (75,<br>271)    | 14 (7, 24)          | 0 (0, 1)           | 0 (0, 0)     |
| P<br>R<br>Y | 1,652 (1,127,<br>2,097)        | All-ages<br>curve          | 18.44<br>(5.19,<br>29.91)                                          | 10.04<br>(0.27,<br>22.81)  | 3.68<br>(0.02,<br>14.80)   | 0.10<br>(0.00,<br>3.61)   | 0.01<br>(0.00,<br>1.44)  | 305 (73,<br>539)                                                 | 166 (5, 396)        | 61 (0, 244)         | 2 (0, 58)          | 0 (0, 23)    |
| P<br>R<br>Y | 1,652 (1,127,<br>2,097)        | Zhang et<br>al. 2021       | 9.43<br>(5.83,<br>12.79)                                           | 4.91<br>(1.30,<br>8.42)    | 0.88<br>(0.02,<br>3.93)    | 0.00<br>(0.00,<br>0.12)   | 0.00<br>(0.00,<br>0.00)  | 156 (82,<br>225)                                                 | 81 (20, 146)        | 15 (0, 64)          | 0 (0, 2)           | 0 (0, 0)     |
| P<br>R<br>Y | 1,652 (1,127,<br>2,097)        | Xie et<br>al. 2021         | 13.01<br>(3.19,<br>22.77)                                          | 6.65<br>(0.34,<br>16.92)   | 2.07<br>(0.05,<br>11.03)   | 0.15<br>(0.00,<br>2.94)   | 0.03<br>(0.00,<br>1.08)  | 215 (46,<br>387)                                                 | 110 (5, 275)        | 34 (1, 170)         | 3 (0, 44)          | 1 (0, 17)    |
| PS<br>E     | 1,598 (935,<br>2,272)          | Age-<br>specific<br>curves | 31.84<br>(16.85,<br>45.27)                                         | 24.48<br>(12.79,<br>35.67) | 16.33<br>(8.48,<br>24.32)  | 0.96<br>(0.53,<br>1.44)   | 0.00<br>(0.00,<br>0.00)  | 509 (205,<br>811)                                                | 391 (156,<br>635)   | 261 (103,<br>428)   | 15 (6, 26)         | 0 (0, 0)     |
| PS<br>E     | 1,598 (935,<br>2,272)          | All-ages<br>curve          | 30.80<br>(13.82,<br>45.67)                                         | 23.01<br>(5.25,<br>40.23)  | 14.67<br>(1.14,<br>34.29)  | 3.42<br>(0.06,<br>20.53)  | 0.84<br>(0.00,<br>9.48)  | 492 (167,<br>901)                                                | 368 (64,<br>783)    | 234 (15,<br>660)    | 55 (1, 358)        | 13 (0, 152)  |
| PS<br>E     | 1,598 (935,<br>2,272)          | Zhang et<br>al. 2021       | 16.95<br>(11.55,<br>21.70)                                         | 12.84<br>(7.15,<br>17.86)  | 8.51<br>(2.70,<br>13.86)   | 1.09<br>(0.04,<br>5.44)   | 0.03<br>(0.00,<br>0.70)  | 271 (141,<br>421)                                                | 205 (96,<br>340)    | 136 (41,<br>257)    | 17 (1, 94)         | 0 (0, 12)    |



| IS<br>O     | Total number<br>of stillbirths | Method                     | Fraction of stillbirths attributable to $PM_{2.5} > C_0 \mu g/m^3$ |                            |                            |                            |                            | Number of stillbirths attributable to $PM_{2.5} > C_0 \mu g/m^3$ |                         |                         |                            |                       |
|-------------|--------------------------------|----------------------------|--------------------------------------------------------------------|----------------------------|----------------------------|----------------------------|----------------------------|------------------------------------------------------------------|-------------------------|-------------------------|----------------------------|-----------------------|
|             |                                |                            | $C_0 = 5$                                                          | $C_0 = 10$                 | $C_0 = 15$                 | $C_0 = 25$                 | $C_0 = 35$                 | $C_0 = 5$                                                        | $C_0 = 10$              | $C_0 = 15$              | $C_0 = 25$                 | $C_0 = 35$            |
| PS<br>E     | 1,598 (935,<br>2,272)          | Xie et<br>al. 2021         | 23.18<br>(8.94,<br>36.38)                                          | 17.59<br>(2.94,<br>31.67)  | 11.59<br>(0.66,<br>26.58)  | 2.93<br>(0.05,<br>15.42)   | 0.59<br>(0.00,<br>6.77)    | 370 (112,<br>685)                                                | 281 (45,<br>594)        | 185 (11,<br>476)        | 47 (1, 261)                | 9 (0, 108)            |
| Q<br>A<br>T | 151 (124, 179)                 | Age-<br>specific<br>curves | 71.16<br>(56.17,<br>80.88)                                         | 68.13<br>(52.60,<br>78.16) | 64.77<br>(49.83,<br>74.41) | 57.06<br>(41.52,<br>69.17) | 48.15<br>(31.53,<br>62.44) | 107 (79,<br>135)                                                 | 103 (76,<br>131)        | 98 (72, 125)            | 86 (61, 113)               | 73 (46, 100)          |
| Q<br>A<br>T | 151 (124, 179)                 | All-ages<br>curve          | 66.81<br>(48.13,<br>78.50)                                         | 63.30<br>(42.55,<br>76.20) | 59.41<br>(36.34,<br>73.64) | 50.48<br>(22.24,<br>67.77) | 40.44<br>(10.74,<br>61.12) | 101 (71,<br>131)                                                 | 96 (63, 126)            | 90 (54, 121)            | 76 (35, 110)               | 61 (18, 96)           |
| Q<br>A<br>T | 151 (124, 179)                 | Zhang et<br>al. 2021       | 54.59<br>(43.10,<br>63.11)                                         | 52.34<br>(40.32,<br>61.28) | 49.98<br>(37.39,<br>59.34) | 44.88<br>(31.10,<br>55.18) | 39.25<br>(24.16,<br>50.58) | 82 (61, 103)                                                     | 79 (57, 99)             | 75 (54, 96)             | 68 (45, 88)                | 59 (35, 80)           |
| Q<br>A<br>T | 151 (124, 179)                 | Xie et<br>al. 2021         | 67.44<br>(40.52,<br>83.35)                                         | 65.09<br>(36.13,<br>82.15) | 62.56<br>(31.39,<br>80.85) | 56.88<br>(20.83,<br>77.94) | 50.26<br>(10.95,<br>74.56) | 102 (59,<br>137)                                                 | 98 (52, 135)            | 94 (45, 132)            | 86 (31, 126)               | 76 (16, 118)          |
| R<br>W<br>A | 6,951 (6,452,<br>7,452)        | Age-<br>specific<br>curves | 48.72<br>(28.58,<br>64.25)                                         | 43.20<br>(25.07,<br>57.86) | 37.07<br>(21.40,<br>50.31) | 22.91<br>(13.56,<br>31.57) | 6.43<br>(4.02,<br>8.94)    | 3,387 (2,092,<br>4,494)                                          | 3,003 (1,846,<br>4,044) | 2,577 (1,569,<br>3,512) | 1,592 (971,<br>2,223)      | 447 (281,<br>627)     |
| R<br>W<br>A | 6,951 (6,452,<br>7,452)        | All-ages<br>curve          | 46.87<br>(27.03,<br>63.37)                                         | 41.06<br>(19.13,<br>59.43) | 34.57<br>(10.61,<br>55.02) | 19.84<br>(1.76,<br>44.87)  | 8.93<br>(0.18,<br>33.40)   | 3,258 (1,858,<br>4,425)                                          | 2,854 (1,314,<br>4,141) | 2,403 (729,<br>3,836)   | 1,379 (121,<br>3,138)      | 621 (12,<br>2,320)    |
| R<br>W<br>A | 6,951 (6,452,<br>7,452)        | Zhang et<br>al. 2021       | 28.14<br>(20.41,<br>34.58)                                         | 24.62<br>(16.51,<br>31.33) | 20.92<br>(12.44,<br>27.92) | 12.97<br>(3.91,<br>20.56)  | 4.81<br>(0.18,<br>12.45)   | 1,956 (1,392,<br>2,437)                                          | 1,711 (1,132,<br>2,212) | 1,454 (859,<br>1,975)   | 901 (271,<br>1,442)        | 334 (12,<br>875)      |
| R<br>W<br>A | 6,951 (6,452,<br>7,452)        | Xie et<br>al. 2021         | 37.55<br>(17.79,<br>54.00)                                         | 33.12<br>(11.78,<br>50.69) | 28.35<br>(5.91,<br>47.11)  | 17.73<br>(0.91,<br>39.11)  | 7.91<br>(0.16,<br>29.82)   | 2,610 (1,187,<br>3,796)                                          | 2,302 (796,<br>3,559)   | 1,971 (400,<br>3,288)   | 1,233 (65,<br>2,708)       | 550 (10,<br>2,049)    |
| S<br>A<br>U | 3,439 (2,022,<br>4,842)        | Age-<br>specific<br>curves | 68.38<br>(52.37,<br>79.06)                                         | 64.96<br>(50.63,<br>75.25) | 61.15<br>(47.66,<br>70.86) | 52.34<br>(38.80,<br>61.57) | 42.11<br>(28.39,<br>53.66) | 2,352 (1,383,<br>3,453)                                          | 2,234 (1,306,<br>3,283) | 2,103 (1,224,<br>3,108) | 1,800<br>(1,018,<br>2,720) | 1,448 (736,<br>2,251) |
| S<br>A<br>U | 3,439 (2,022,<br>4,842)        | All-ages<br>curve          | 62.89<br>(43.42,<br>75.27)                                         | 58.90<br>(37.33,<br>72.62) | 54.45<br>(30.70,<br>69.67) | 44.26<br>(17.22,<br>62.90) | 33.18<br>(7.54,<br>55.28)  | 2,163 (1,144,<br>3,233)                                          | 2,026 (1,083,<br>3,098) | 1,872 (937,<br>2,935)   | 1,522 (560,<br>2,578)      | 1,141 (280,<br>2,183) |
| S<br>A<br>U | 3,439 (2,022,<br>4,842)        | Zhang et<br>al. 2021       | 48.32<br>(37.61,<br>56.51)                                         | 45.77<br>(34.52,<br>54.36) | 43.09<br>(31.29,<br>52.11) | 37.31<br>(24.37,<br>47.24) | 31.01<br>(17.15,<br>41.89) | 1,662 (959,<br>2,478)                                            | 1,574 (900,<br>2,361)   | 1,482 (818,<br>2,257)   | 1,283 (676,<br>2,024)      | 1,066 (504,<br>1,745) |

| IS<br>O     | Total number<br>of stillbirths | Method                     | Fraction of stillbirths attributable to $PM_{2.5} > C_0 \mu g/m^3$ |                            |                            |                            |                            | Number of stillbirths attributable to $PM_{2.5} > C_0 \mu g/m^3$ |                              |                              |                             |                            |
|-------------|--------------------------------|----------------------------|--------------------------------------------------------------------|----------------------------|----------------------------|----------------------------|----------------------------|------------------------------------------------------------------|------------------------------|------------------------------|-----------------------------|----------------------------|
|             |                                |                            | $C_0 = 5$                                                          | $C_0 = 10$                 | $C_0 = 15$                 | $C_0 = 25$                 | $C_0 = 35$                 | $C_0 = 5$                                                        | $C_0 = 10$                   | $C_0 = 15$                   | $C_0 = 25$                  | $C_0 = 35$                 |
| S<br>A<br>U | 3,439 (2,022,<br>4,842)        | Xie et<br>al. 2021         | 60.58<br>(35.04,<br>77.09)                                         | 57.69<br>(30.31,<br>75.42) | 54.58<br>(25.27,<br>73.61) | 47.63<br>(15.14,<br>69.55) | 39.79<br>(7.52,<br>64.82)  | 2,083 (930,<br>3,024)                                            | 1,984 (815,<br>2,911)        | 1,877 (692,<br>2,812)        | 1,638 (436,<br>2,620)       | 1,368 (204,<br>2,398)      |
| S<br>D<br>N | 31,918<br>(21,675,<br>43,101)  | Age-<br>specific<br>curves | 47.55<br>(28.12,<br>62.69)                                         | 41.92<br>(24.62,<br>56.02) | 35.68<br>(20.88,<br>48.15) | 21.39<br>(13.40,<br>29.22) | 7.25<br>(4.81,<br>9.66)    | 15,176<br>(7,706,<br>22,544)                                     | 13,380<br>(6,780,<br>20,106) | 11,388<br>(5,832,<br>17,204) | 6,826<br>(3,654,<br>10,397) | 2,314<br>(1,268,<br>3,431) |
| S<br>D<br>N | 31,918<br>(21,675,<br>43,101)  | All-ages<br>curve          | 46.09<br>(26.62,<br>62.35)                                         | 40.25<br>(18.78,<br>58.32) | 33.73<br>(10.81,<br>53.84) | 19.58<br>(2.30,<br>43.56)  | 9.14<br>(0.49,<br>32.37)   | 14,711<br>(7,317,<br>23,561)                                     | 12,846<br>(5,023,<br>21,639) | 10,768<br>(3,018,<br>19,788) | 6,251 (654,<br>15,374)      | 2,916 (127,<br>11,044)     |
| S<br>D<br>N | 31,918<br>(21,675,<br>43,101)  | Zhang et<br>al. 2021       | 27.75<br>(20.10,<br>34.14)                                         | 24.18<br>(16.15,<br>30.88) | 20.44<br>(12.01,<br>27.47) | 12.46<br>(4.09,<br>20.12)  | 5.16<br>(0.55,<br>12.29)   | 8,856 (5,200,<br>13,486)                                         | 7,719 (4,122,<br>12,030)     | 6,525 (3,145,<br>10,498)     | 3,976<br>(1,088,<br>7,365)  | 1,646 (153,<br>4,362)      |
| S<br>D<br>N | 31,918<br>(21,675,<br>43,101)  | Xie et<br>al. 2021         | 36.91<br>(17.54,<br>53.21)                                         | 32.30<br>(11.57,<br>49.79) | 27.34<br>(6.09,<br>46.11)  | 16.65<br>(1.03,<br>37.84)  | 7.80<br>(0.29,<br>28.52)   | 11,781<br>(5,143,<br>19,708)                                     | 10,311<br>(3,303,<br>17,917) | 8,727 (1,755,<br>16,075)     | 5,314 (337,<br>12,744)      | 2,490 (92,<br>9,075)       |
| S<br>E<br>N | 10,951<br>(10,158,<br>11,876)  | Age-<br>specific<br>curves | 55.13<br>(34.70,<br>69.38)                                         | 50.31<br>(32.11,<br>64.15) | 44.95<br>(29.10,<br>57.89) | 32.63<br>(21.56,<br>42.73) | 18.37<br>(12.31,<br>23.79) | 6,038 (3,855,<br>7,788)                                          | 5,509 (3,529,<br>7,172)      | 4,923 (3,156,<br>6,447)      | 3,573<br>(2,298,<br>4,762)  | 2,011<br>(1,343,<br>2,716) |
| S<br>E<br>N | 10,951<br>(10,158,<br>11,876)  | All-ages<br>curve          | 52.82<br>(31.87,<br>68.10)                                         | 47.55<br>(24.62,<br>64.64) | 41.66<br>(16.59,<br>60.79) | 28.19<br>(4.51,<br>51.91)  | 15.10<br>(1.02,<br>42.02)  | 5,785 (3,444,<br>7,500)                                          | 5,208 (2,665,<br>7,095)      | 4,562 (1,798,<br>6,637)      | 3,087 (491,<br>5,699)       | 1,653 (111,<br>4,630)      |
| S<br>E<br>N | 10,951<br>(10,158,<br>11,876)  | Zhang et<br>al. 2021       | 33.81<br>(25.06,<br>41.00)                                         | 30.54<br>(21.36,<br>38.10) | 27.10<br>(17.49,<br>35.05) | 19.69<br>(9.16,<br>28.48)  | 11.59<br>(2.23,<br>21.24)  | 3,702 (2,681,<br>4,469)                                          | 3,344 (2,277,<br>4,138)      | 2,967 (1,867,<br>3,815)      | 2,156 (995,<br>3,085)       | 1,269 (239,<br>2,284)      |
| S<br>E<br>N | 10,951<br>(10,158,<br>11,876)  | Xie et<br>al. 2021         | 44.37<br>(22.48,<br>61.65)                                         | 40.33<br>(16.85,<br>58.87) | 35.96<br>(10.92,<br>55.86) | 26.19<br>(2.82,<br>49.10)  | 15.93<br>(0.65,<br>41.22)  | 4,859 (2,395,<br>6,901)                                          | 4,416 (1,821,<br>6,582)      | 3,938 (1,195,<br>6,252)      | 2,868 (309,<br>5,436)       | 1,744 (71,<br>4,478)       |
| S<br>G<br>P | 109 (99, 119)                  | Age-<br>specific<br>curves | 35.63<br>(17.13,<br>52.08)                                         | 28.95<br>(13.97,<br>43.33) | 21.53<br>(10.46,<br>32.94) | 4.24<br>(2.15,<br>6.69)    | 0.00<br>(0.00,<br>0.00)    | 39 (19, 56)                                                      | 32 (15, 47)                  | 23 (11, 35)                  | 5 (2, 7)                    | 0 (0, 0)                   |
| S<br>G<br>P | 109 (99, 119)                  | All-ages<br>curve          | 36.06<br>(16.29,<br>50.52)                                         | 30.01<br>(6.51,<br>45.38)  | 23.32<br>(1.80,<br>39.76)  | 9.48<br>(0.06,<br>26.99)   | 4.15<br>(0.00,<br>14.67)   | 39 (18, 57)                                                      | 33 (7, 51)                   | 25 (2, 44)                   | 10 (0, 30)                  | 5 (0, 16)                  |
| S<br>G<br>P | 109 (99, 119)                  | Zhang et<br>al. 2021       | 19.71<br>(13.61,<br>24.83)                                         | 15.83<br>(9.33,<br>21.15)  | 11.77<br>(4.77,<br>17.31)  | 3.35<br>(0.07,<br>8.91)    | 0.07<br>(0.00,<br>1.87)    | 21 (15, 27)                                                      | 17 (10, 23)                  | 13 (5, 19)                   | 4 (0, 10)                   | 0 (0, 2)                   |

| IS<br>O     | Total number<br>of stillbirths | Method              | Fraction of stillbirths attributable to $PM_{2.5} > C_0 \mu g/m^3$ |                            |                            |                           |                          | Number of stillbirths attributable to $PM_{2.5} > C_0 \mu g/m^3$ |                       |                       |                    |                  |
|-------------|--------------------------------|---------------------|--------------------------------------------------------------------|----------------------------|----------------------------|---------------------------|--------------------------|------------------------------------------------------------------|-----------------------|-----------------------|--------------------|------------------|
|             |                                |                     | $C_0 = 5$                                                          | $C_0 = 10$                 | $C_0 = 15$                 | $C_0 = 25$                | $C_0 = 35$               | $C_0 = 5$                                                        | $C_0 = 10$            | $C_0 = 15$            | $C_0 = 25$         | $C_0 = 35$       |
| S<br>G<br>P | 109 (99, 119)                  | Xie et al. 2021     | 26.35<br>(10.53,<br>40.73)                                         | 20.63<br>(4.33,<br>36.32)  | 14.46<br>(1.05,<br>31.61)  | 4.98<br>(0.06,<br>21.11)  | 1.59<br>(0.00,<br>11.33) | 29 (11, 44)                                                      | 22 (4, 39)            | 16 (1, 34)            | 5 (0, 23)          | 2 (0, 12)        |
| S<br>L<br>B | 221 (123, 319)                 | Age-specific curves | 12.42<br>(6.34,<br>19.06)                                          | 2.80<br>(1.40,<br>4.42)    | 0.00<br>(0.00,<br>0.09)    | 0.00<br>(0.00,<br>0.11)   | 0.00<br>(0.00,<br>0.00)  | 27 (11, 50)                                                      | 6 (2, 12)             | 0 (0, 0)              | 0 (0, 0)           | 0 (0, 0)         |
| S<br>L<br>B | 221 (123, 319)                 | All-ages curve      | 12.15<br>(2.16,<br>21.99)                                          | 3.71<br>(0.00,<br>13.61)   | 0.62<br>(0.00,<br>7.01)    | 0.00<br>(0.00,<br>1.80)   | 0.00<br>(0.00,<br>0.58)  | 27 (4, 55)                                                       | 8 (0, 31)             | 1 (0, 15)             | 0 (0, 4)           | 0 (0, 1)         |
| S<br>L<br>B | 221 (123, 319)                 | Zhang et al. 2021   | 5.91<br>(3.31,<br>8.76)                                            | 1.20<br>(0.05,<br>4.25)    | 0.00<br>(0.00,<br>0.68)    | 0.00<br>(0.00,<br>0.00)   | 0.00<br>(0.00,<br>0.00)  | 13 (6, 22)                                                       | 3 (0, 10)             | 0 (0, 1)              | 0 (0, 0)           | 0 (0, 0)         |
| S<br>L<br>B | 221 (123, 319)                 | Xie et al. 2021     | 8.65<br>(1.13,<br>16.34)                                           | 2.60<br>(0.00,<br>10.14)   | 0.04<br>(0.00,<br>4.70)    | 0.00<br>(0.00,<br>1.40)   | 0.00<br>(0.00,<br>0.89)  | 19 (2, 42)                                                       | 6 (0, 26)             | 0 (0, 11)             | 0 (0, 3)           | 0 (0, 2)         |
| S<br>L<br>E | 6,409 (3,576,<br>9,115)        | Age-specific curves | 38.40<br>(21.09,<br>53.52)                                         | 31.78<br>(17.32,<br>45.27) | 24.44<br>(13.29,<br>35.49) | 7.59<br>(4.17,<br>11.27)  | 0.00<br>(0.00,<br>0.00)  | 2,461 (1,087,<br>3,698)                                          | 2,037 (901,<br>3,118) | 1,566 (694,<br>2,445) | 486 (217,<br>780)  | 0 (0, 0)         |
| S<br>L<br>E | 6,409 (3,576,<br>9,115)        | All-ages curve      | 37.47<br>(18.91,<br>53.05)                                         | 30.75<br>(10.36,<br>48.27) | 23.29<br>(3.70,<br>42.97)  | 8.27<br>(0.20,<br>30.33)  | 1.10<br>(0.00,<br>17.77) | 2,402 (902,<br>3,873)                                            | 1,971 (525,<br>3,452) | 1,493 (160,<br>2,999) | 530 (11,<br>2,071) | 70 (0,<br>1,147) |
| S<br>L<br>E | 6,409 (3,576,<br>9,115)        | Zhang et al. 2021   | 21.15<br>(14.71,<br>26.50)                                         | 17.34<br>(10.45,<br>22.87) | 13.34<br>(5.98,<br>19.06)  | 4.90<br>(0.26,<br>10.92)  | 0.86<br>(0.00,<br>3.01)  | 1,356 (665,<br>1,974)                                            | 1,111 (497,<br>1,672) | 855 (288,<br>1,348)   | 314 (15,<br>687)   | 55 (0, 181)      |
| S<br>L<br>E | 6,409 (3,576,<br>9,115)        | Xie et al. 2021     | 28.23<br>(12.31,<br>43.07)                                         | 22.66<br>(6.11,<br>38.71)  | 16.63<br>(1.83,<br>34.12)  | 5.92<br>(0.17,<br>24.02)  | 1.97<br>(0.00,<br>13.16) | 1,809 (594,<br>3,061)                                            | 1,452 (289,<br>2,705) | 1,066 (90,<br>2,346)  | 380 (10,<br>1,619) | 126 (0, 856)     |
| S<br>L<br>V | 1,316 (935,<br>1,675)          | Age-specific curves | 38.48<br>(21.34,<br>53.21)                                         | 31.88<br>(17.40,<br>44.99) | 24.56<br>(13.24,<br>35.24) | 8.19<br>(4.57,<br>11.93)  | 0.01<br>(0.01,<br>0.02)  | 506 (254,<br>764)                                                | 419 (209,<br>642)     | 323 (159,<br>501)     | 108 (52,<br>171)   | 0 (0, 0)         |
| S<br>L<br>V | 1,316 (935,<br>1,675)          | All-ages curve      | 37.94<br>(18.98,<br>53.12)                                         | 31.53<br>(10.26,<br>48.25) | 24.41<br>(3.67,<br>42.83)  | 10.59<br>(0.34,<br>30.48) | 3.48<br>(0.03,<br>18.12) | 499 (226,<br>808)                                                | 415 (119,<br>719)     | 321 (46,<br>623)      | 139 (4, 432)       | 46 (0, 248)      |
| S<br>L<br>V | 1,316 (935,<br>1,675)          | Zhang et al. 2021   | 21.26<br>(14.92,<br>26.73)                                         | 17.35<br>(10.71,<br>23.11) | 13.23<br>(6.31,<br>19.31)  | 4.74<br>(0.54,<br>11.15)  | 0.43<br>(0.00,<br>3.60)  | 280 (166,<br>402)                                                | 228 (126,<br>345)     | 174 (77,<br>285)      | 62 (6, 159)        | 6 (0, 51)        |

| IS<br>O     | Total number<br>of stillbirths | Method                     | Fraction of stillbirths attributable to $PM_{2.5} > C_0 \mu g/m^3$ |                            |                           |                          |                          | Number of stillbirths attributable to $PM_{2.5} > C_0 \mu g/m^3$ |                         |                       |                    |                   |
|-------------|--------------------------------|----------------------------|--------------------------------------------------------------------|----------------------------|---------------------------|--------------------------|--------------------------|------------------------------------------------------------------|-------------------------|-----------------------|--------------------|-------------------|
|             |                                |                            | $C_0 = 5$                                                          | $C_0 = 10$                 | $C_0 = 15$                | $C_0 = 25$               | $C_0 = 35$               | $C_0 = 5$                                                        | $C_0 = 10$              | $C_0 = 15$            | $C_0 = 25$         | $C_0 = 35$        |
| S<br>L<br>V | 1,316 (935,<br>1,675)          | Xie et<br>al. 2021         | 28.87<br>(12.37,<br>43.57)                                         | 23.76<br>(6.20,<br>39.48)  | 18.28<br>(2.16,<br>35.07) | 7.86<br>(0.25,<br>25.07) | 2.46<br>(0.06,<br>14.82) | 380 (138,<br>590)                                                | 313 (70,<br>522)        | 241 (22,<br>452)      | 103 (4, 311)       | 32 (1, 178)       |
| S<br>O<br>M | 16,635 (9,680,<br>23,718)      | Age-<br>specific<br>curves | 24.62<br>(13.48,<br>35.56)                                         | 16.34<br>(8.86,<br>23.94)  | 8.23<br>(4.54,<br>11.99)  | 2.08<br>(1.26,<br>2.99)  | 0.16<br>(0.11,<br>0.22)  | 4,095 (1,766,<br>6,778)                                          | 2,719 (1,177,<br>4,542) | 1,370 (591,<br>2,264) | 347 (168,<br>562)  | 26 (13, 43)       |
| S<br>O<br>M | 16,635 (9,680,<br>23,718)      | All-ages<br>curve          | 23.57<br>(9.40,<br>36.16)                                          | 15.42<br>(3.45,<br>29.40)  | 8.76<br>(1.09,<br>22.20)  | 3.10<br>(0.13,<br>11.11) | 1.15<br>(0.02,<br>5.67)  | 3,921 (1,169,<br>7,177)                                          | 2,565 (464,<br>5,489)   | 1,457 (170,<br>3,913) | 516 (17,<br>1,877) | 191 (3, 962)      |
| S<br>O<br>M | 16,635 (9,680,<br>23,718)      | Zhang et<br>al. 2021       | 12.88<br>(8.36,<br>16.71)                                          | 8.66<br>(4.04,<br>12.60)   | 4.82<br>(1.79,<br>8.40)   | 1.32<br>(0.20,<br>3.21)  | 0.20<br>(0.01,<br>1.04)  | 2,142 (1,054,<br>3,271)                                          | 1,441 (527,<br>2,296)   | 803 (232,<br>1,418)   | 219 (28,<br>520)   | 34 (2, 156)       |
| S<br>O<br>M | 16,635 (9,680,<br>23,718)      | Xie et<br>al. 2021         | 17.61<br>(6.00,<br>28.71)                                          | 11.83<br>(1.99,<br>23.49)  | 7.16<br>(0.66,<br>17.98)  | 2.52<br>(0.11,<br>9.43)  | 1.05<br>(0.03,<br>5.01)  | 2,929 (804,<br>5,281)                                            | 1,968 (316,<br>4,187)   | 1,192 (105,<br>3,021) | 419 (16,<br>1,585) | 174 (4, 828)      |
| SS<br>D     | 11,379 (6,367,<br>16,113)      | Age-<br>specific<br>curves | 33.28<br>(18.10,<br>47.15)                                         | 26.00<br>(13.99,<br>37.69) | 17.92<br>(9.60,<br>26.54) | 2.05<br>(1.13,<br>3.06)  | 0.01<br>(0.01,<br>0.01)  | 3,786 (1,775,<br>6,423)                                          | 2,959 (1,387,<br>5,120) | 2,040 (959,<br>3,586) | 234 (115,<br>416)  | 1 (1, 2)          |
| SS<br>D     | 11,379 (6,367,<br>16,113)      | All-ages<br>curve          | 32.03<br>(14.90,<br>46.74)                                         | 24.54<br>(6.50,<br>41.11)  | 16.32<br>(1.81,<br>34.86) | 4.80<br>(0.11,<br>21.18) | 1.08<br>(0.01,<br>10.15) | 3,644 (1,381,<br>6,643)                                          | 2,793 (572,<br>5,593)   | 1,857 (156,<br>4,641) | 546 (9,<br>2,723)  | 123 (1,<br>1,253) |
| SS<br>D     | 11,379 (6,367,<br>16,113)      | Zhang et<br>al. 2021       | 17.67<br>(12.12,<br>22.48)                                         | 13.61<br>(7.82,<br>18.63)  | 9.34<br>(3.46,<br>14.60)  | 1.89<br>(0.08,<br>6.24)  | 0.12<br>(0.00,<br>1.02)  | 2,011 (1,030,<br>3,181)                                          | 1,549 (629,<br>2,554)   | 1,063 (300,<br>1,937) | 215 (9, 781)       | 14 (0, 121)       |
| SS<br>D     | 11,379 (6,367,<br>16,113)      | Xie et<br>al. 2021         | 24.06<br>(9.60,<br>37.61)                                          | 18.48<br>(3.64,<br>33.06)  | 12.53<br>(0.88,<br>28.15) | 3.42<br>(0.07,<br>17.39) | 0.84<br>(0.03,<br>8.14)  | 2,737 (912,<br>4,664)                                            | 2,103 (358,<br>4,020)   | 1,425 (90,<br>3,255)  | 389 (8,<br>1,984)  | 96 (3, 911)       |
| S<br>T<br>P | 90 (52, 129)                   | Age-<br>specific<br>curves | 25.93<br>(13.98,<br>37.82)                                         | 17.81<br>(9.45,<br>26.59)  | 8.78<br>(4.61,<br>13.34)  | 0.25<br>(0.15,<br>0.39)  | 0.00<br>(0.00,<br>0.00)  | 23 (10, 40)                                                      | 16 (7, 28)              | 8 (3, 14)             | 0 (0, 0)           | 0 (0, 0)          |
| S<br>T<br>P | 90 (52, 129)                   | All-ages<br>curve          | 25.62<br>(9.49,<br>38.17)                                          | 18.36<br>(2.52,<br>31.76)  | 10.57<br>(0.46,<br>24.98) | 2.70<br>(0.03,<br>11.82) | 1.03<br>(0.00,<br>4.41)  | 23 (8, 42)                                                       | 17 (2, 34)              | 10 (0, 26)            | 2 (0, 11)          | 1 (0, 4)          |
| S<br>T<br>P | 90 (52, 129)                   | Zhang et<br>al. 2021       | 13.27<br>(8.74,<br>17.28)                                          | 8.91<br>(4.33,<br>13.23)   | 4.48<br>(1.05,<br>8.95)   | 0.33<br>(0.01,<br>1.92)  | 0.00<br>(0.00,<br>0.20)  | 12 (6, 19)                                                       | 8 (3, 14)               | 4 (1, 9)              | 0 (0, 2)           | 0 (0, 0)          |

| IS<br>O     | Total number<br>of stillbirths | Method              | Fraction of stillbirths attributable to $PM_{2.5} > C_0 \mu g/m^3$ |                           |                          |                          |                         | Number of stillbirths attributable to $PM_{2.5} > C_0 \mu g/m^3$ |              |             |            |            |
|-------------|--------------------------------|---------------------|--------------------------------------------------------------------|---------------------------|--------------------------|--------------------------|-------------------------|------------------------------------------------------------------|--------------|-------------|------------|------------|
|             |                                |                     | $C_0 = 5$                                                          | $C_0 = 10$                | $C_0 = 15$               | $C_0 = 25$               | $C_0 = 35$              | $C_0 = 5$                                                        | $C_0 = 10$   | $C_0 = 15$  | $C_0 = 25$ | $C_0 = 35$ |
| S<br>T<br>P | 90 (52, 129)                   | Xie et al. 2021     | 18.18<br>(5.99,<br>29.91)                                          | 12.08<br>(1.38,<br>24.76) | 6.34<br>(0.29,<br>19.25) | 1.41<br>(0.04,<br>8.92)  | 0.22<br>(0.01,<br>3.38) | 16 (5, 30)                                                       | 11 (1, 24)   | 6 (0, 18)   | 1 (0, 9)   | 0 (0, 3)   |
| S<br>U<br>R | 129 (80, 178)                  | Age-specific curves | 26.17<br>(13.55,<br>38.44)                                         | 18.26<br>(9.29,<br>27.51) | 9.48<br>(4.76,<br>14.64) | 0.00<br>(0.00,<br>0.00)  | 0.00<br>(0.00,<br>0.00) | 34 (13, 56)                                                      | 24 (9, 40)   | 12 (5, 21)  | 0 (0, 0)   | 0 (0, 0)   |
| S<br>U<br>R | 129 (80, 178)                  | All-ages curve      | 25.39<br>(9.96,<br>39.25)                                          | 17.09<br>(2.48,<br>33.27) | 8.47<br>(0.24,<br>25.98) | 0.88<br>(0.00,<br>12.33) | 0.04<br>(0.00,<br>4.25) | 33 (9, 59)                                                       | 22 (2, 48)   | 11 (0, 37)  | 1 (0, 15)  | 0 (0, 5)   |
| S<br>U<br>R | 129 (80, 178)                  | Zhang et al. 2021   | 13.99<br>(8.96,<br>17.79)                                          | 10.06<br>(4.32,<br>13.78) | 5.96<br>(0.59,<br>9.61)  | 0.84<br>(0.00,<br>1.71)  | 0.00<br>(0.00,<br>0.07) | 18 (9, 26)                                                       | 13 (5, 19)   | 8 (1, 12)   | 1 (0, 2)   | 0 (0, 0)   |
| S<br>U<br>R | 129 (80, 178)                  | Xie et al. 2021     | 18.83<br>(6.53,<br>30.45)                                          | 12.93<br>(1.43,<br>25.25) | 7.13<br>(0.20,<br>19.33) | 1.65<br>(0.00,<br>8.22)  | 0.46<br>(0.00,<br>3.07) | 24 (6, 45)                                                       | 17 (1, 37)   | 9 (0, 28)   | 2 (0, 12)  | 1 (0, 4)   |
| S<br>W<br>Z | 428 (296, 555)                 | Age-specific curves | 23.42<br>(12.05,<br>34.47)                                         | 15.16<br>(7.65,<br>22.86) | 6.12<br>(3.09,<br>9.41)  | 0.00<br>(0.00,<br>0.01)  | 0.00<br>(0.00,<br>0.00) | 100 (45,<br>164)                                                 | 65 (28, 108) | 26 (11, 44) | 0 (0, 0)   | 0 (0, 0)   |
| S<br>W<br>Z | 428 (296, 555)                 | All-ages curve      | 23.25<br>(8.21,<br>35.68)                                          | 15.45<br>(1.69,<br>29.08) | 8.00<br>(0.28,<br>21.77) | 1.39<br>(0.00,<br>8.64)  | 0.61<br>(0.00,<br>2.91) | 99 (29, 166)                                                     | 66 (6, 130)  | 34 (1, 96)  | 6 (0, 38)  | 3 (0, 13)  |
| S<br>W<br>Z | 428 (296, 555)                 | Zhang et al. 2021   | 12.09<br>(7.78,<br>15.87)                                          | 7.73<br>(3.27,<br>11.74)  | 3.36<br>(0.47,<br>7.41)  | 0.07<br>(0.00,<br>1.05)  | 0.00<br>(0.00,<br>0.05) | 52 (31, 75)                                                      | 33 (13, 54)  | 14 (2, 34)  | 0 (0, 5)   | 0 (0, 0)   |
| S<br>W<br>Z | 428 (296, 555)                 | Xie et al. 2021     | 16.60<br>(5.27,<br>27.69)                                          | 10.46<br>(0.87,<br>22.29) | 5.02<br>(0.17,<br>16.55) | 1.05<br>(0.02,<br>6.78)  | 0.36<br>(0.00,<br>2.29) | 71 (19, 129)                                                     | 45 (3, 101)  | 21 (1, 73)  | 5 (0, 29)  | 2 (0, 10)  |
| S<br>Y<br>C | 16 (13, 19)                    | Age-specific curves | 8.17<br>(4.11,<br>12.91)                                           | 0.04<br>(0.02,<br>0.06)   | 0.00<br>(0.00,<br>0.16)  | 0.00<br>(0.00,<br>0.21)  | 0.00<br>(0.00,<br>0.00) | 1 (1, 2)                                                         | 0 (0, 0)     | 0 (0, 0)    | 0 (0, 0)   | 0 (0, 0)   |
| S<br>Y<br>C | 16 (13, 19)                    | All-ages curve      | 7.74<br>(0.71,<br>16.69)                                           | 1.26<br>(0.00,<br>7.85)   | 0.17<br>(0.00,<br>2.69)  | 0.00<br>(0.00,<br>0.84)  | 0.00<br>(0.00,<br>0.15) | 1 (0, 3)                                                         | 0 (0, 1)     | 0 (0, 0)    | 0 (0, 0)   | 0 (0, 0)   |
| S<br>Y<br>C | 16 (13, 19)                    | Zhang et al. 2021   | 4.09<br>(1.62,<br>6.20)                                            | 0.24<br>(0.00,<br>1.70)   | 0.00<br>(0.00,<br>0.10)  | 0.00<br>(0.00,<br>0.00)  | 0.00<br>(0.00,<br>0.00) | 1 (0, 1)                                                         | 0 (0, 0)     | 0 (0, 0)    | 0 (0, 0)   | 0 (0, 0)   |

| IS<br>O     | Total number<br>of stillbirths | Method              | Fraction of stillbirths attributable to $PM_{2.5} > C_0 \mu g/m^3$ |                            |                            |                            |                           | Number of stillbirths attributable to $PM_{2.5} > C_0 \mu g/m^3$ |                          |                          |                            |                            |
|-------------|--------------------------------|---------------------|--------------------------------------------------------------------|----------------------------|----------------------------|----------------------------|---------------------------|------------------------------------------------------------------|--------------------------|--------------------------|----------------------------|----------------------------|
|             |                                |                     | $C_0 = 5$                                                          | $C_0 = 10$                 | $C_0 = 15$                 | $C_0 = 25$                 | $C_0 = 35$                | $C_0 = 5$                                                        | $C_0 = 10$               | $C_0 = 15$               | $C_0 = 25$                 | $C_0 = 35$                 |
| S<br>Y<br>C | 16 (13, 19)                    | Xie et al. 2021     | 5.41<br>(0.42,<br>12.01)                                           | 1.11<br>(0.00,<br>5.70)    | 0.38<br>(0.00,<br>1.68)    | 0.15<br>(0.00,<br>0.59)    | 0.00<br>(0.00,<br>0.33)   | 1 (0, 2)                                                         | 0 (0, 1)                 | 0 (0, 0)                 | 0 (0, 0)                   | 0 (0, 0)                   |
| S<br>Y<br>R | 5,019 (3,021,<br>7,094)        | Age-specific curves | 44.44<br>(25.39,<br>59.87)                                         | 38.54<br>(21.82,<br>52.72) | 31.99<br>(18.06,<br>44.29) | 16.96<br>(10.08,<br>23.69) | 4.35<br>(2.82,<br>5.95)   | 2,230 (1,023,<br>3,477)                                          | 1,934 (889,<br>3,042)    | 1,606 (743,<br>2,544)    | 851 (410,<br>1,359)        | 218 (115,<br>345)          |
| S<br>Y<br>R | 5,019 (3,021,<br>7,094)        | All-ages curve      | 43.56<br>(24.41,<br>59.57)                                         | 37.60<br>(16.27,<br>55.27) | 30.97<br>(8.63,<br>50.48)  | 17.02<br>(1.35,<br>39.50)  | 7.82<br>(0.23,<br>27.74)  | 2,186 (890,<br>3,479)                                            | 1,887 (609,<br>3,206)    | 1,554 (346,<br>2,870)    | 854 (67,<br>2,176)         | 392 (13,<br>1,450)         |
| S<br>Y<br>R | 5,019 (3,021,<br>7,094)        | Zhang et al. 2021   | 25.60<br>(18.36,<br>31.66)                                         | 21.95<br>(14.33,<br>28.28) | 18.11<br>(10.09,<br>24.72) | 9.93<br>(2.65,<br>17.06)   | 3.26<br>(0.23,<br>9.11)   | 1,285 (699,<br>1,853)                                            | 1,102 (563,<br>1,633)    | 909 (424,<br>1,416)      | 498 (117,<br>953)          | 164 (10,<br>482)           |
| S<br>Y<br>R | 5,019 (3,021,<br>7,094)        | Xie et al. 2021     | 34.20<br>(15.70,<br>50.05)                                         | 29.38<br>(9.48,<br>46.39)  | 24.18<br>(4.31,<br>42.42)  | 13.47<br>(0.71,<br>33.52)  | 5.98<br>(0.24,<br>23.69)  | 1,717 (686,<br>2,721)                                            | 1,475 (419,<br>2,491)    | 1,213 (208,<br>2,243)    | 676 (33,<br>1,703)         | 300 (11,<br>1,132)         |
| T<br>C<br>D | 18,009<br>(10,916,<br>25,485)  | Age-specific curves | 49.90<br>(31.57,<br>63.86)                                         | 44.52<br>(28.02,<br>57.67) | 38.56<br>(24.92,<br>50.43) | 24.90<br>(17.16,<br>32.71) | 11.20<br>(7.52,<br>14.36) | 8,986 (3,966,<br>13,649)                                         | 8,018 (3,563,<br>12,280) | 6,944 (3,137,<br>10,781) | 4,485<br>(2,212,<br>6,976) | 2,017<br>(1,000,<br>3,071) |
| T<br>C<br>D | 18,009<br>(10,916,<br>25,485)  | All-ages curve      | 48.71<br>(28.88,<br>64.27)                                         | 43.25<br>(21.24,<br>60.48) | 37.18<br>(13.38,<br>56.26) | 23.70<br>(3.98,<br>46.58)  | 12.79<br>(1.41,<br>35.74) | 8,772 (3,324,<br>13,455)                                         | 7,789 (2,476,<br>12,276) | 6,695 (1,680,<br>11,015) | 4,267 (644,<br>8,388)      | 2,303 (196,<br>6,165)      |
| T<br>C<br>D | 18,009<br>(10,916,<br>25,485)  | Zhang et al. 2021   | 30.60<br>(22.55,<br>37.28)                                         | 27.16<br>(18.74,<br>34.19) | 23.54<br>(14.74,<br>30.94) | 15.76<br>(6.94,<br>23.94)  | 8.43<br>(2.72,<br>16.35)  | 5,511 (2,842,<br>7,991)                                          | 4,891 (2,395,<br>7,199)  | 4,239 (1,930,<br>6,350)  | 2,838 (928,<br>4,658)      | 1,518 (385,<br>2,968)      |
| T<br>C<br>D | 18,009<br>(10,916,<br>25,485)  | Xie et al. 2021     | 40.22<br>(19.95,<br>56.64)                                         | 35.82<br>(14.10,<br>53.43) | 31.07<br>(8.58,<br>49.97)  | 20.94<br>(2.81,<br>42.18)  | 12.43<br>(1.04,<br>33.36) | 7,243 (3,197,<br>11,504)                                         | 6,451 (2,293,<br>10,498) | 5,595 (1,519,<br>9,685)  | 3,770 (483,<br>8,036)      | 2,238 (188,<br>6,325)      |
| T<br>G<br>O | 6,050 (3,489,<br>8,563)        | Age-specific curves | 48.23<br>(28.48,<br>63.19)                                         | 42.64<br>(25.03,<br>56.58) | 36.43<br>(21.36,<br>48.87) | 22.14<br>(13.84,<br>29.85) | 8.36<br>(5.70,<br>10.92)  | 2,918 (1,519,<br>4,777)                                          | 2,580 (1,356,<br>4,256)  | 2,204 (1,175,<br>3,681)  | 1,340 (739,<br>2,246)      | 506 (284,<br>822)          |
| T<br>G<br>O | 6,050 (3,489,<br>8,563)        | All-ages curve      | 46.58<br>(27.01,<br>62.77)                                         | 40.86<br>(19.19,<br>58.73) | 34.50<br>(11.32,<br>54.23) | 20.30<br>(2.45,<br>43.88)  | 9.59<br>(0.59,<br>32.63)  | 2,818 (1,191,<br>4,613)                                          | 2,472 (823,<br>4,187)    | 2,087 (518,<br>3,792)    | 1,228 (149,<br>3,030)      | 580 (31,<br>2,128)         |
| T<br>G<br>O | 6,050 (3,489,<br>8,563)        | Zhang et al. 2021   | 28.21<br>(20.52,<br>34.68)                                         | 24.67<br>(16.61,<br>31.46) | 20.94<br>(12.51,<br>28.09) | 12.93<br>(4.62,<br>20.82)  | 5.73<br>(0.90,<br>12.92)  | 1,707 (964,<br>2,646)                                            | 1,492 (803,<br>2,379)    | 1,267 (613,<br>2,073)    | 782 (249,<br>1,455)        | 346 (40,<br>867)           |

| IS<br>O     | Total number<br>of stillbirths | Method                     | Fraction of stillbirths attributable to $PM_{2.5} > C_0 \mu g/m^3$ |                            |                            |                           |                          | Number of stillbirths attributable to $PM_{2.5} > C_0 \mu g/m^3$ |                       |                       |                      |                    |
|-------------|--------------------------------|----------------------------|--------------------------------------------------------------------|----------------------------|----------------------------|---------------------------|--------------------------|------------------------------------------------------------------|-----------------------|-----------------------|----------------------|--------------------|
|             |                                |                            | $C_0 = 5$                                                          | $C_0 = 10$                 | $C_0 = 15$                 | $C_0 = 25$                | $C_0 = 35$               | $C_0 = 5$                                                        | $C_0 = 10$            | $C_0 = 15$            | $C_0 = 25$           | $C_0 = 35$         |
| T<br>G<br>O | 6,050 (3,489,<br>8,563)        | Xie et<br>al. 2021         | 37.48<br>(17.96,<br>53.83)                                         | 32.92<br>(12.02,<br>50.47) | 27.99<br>(6.46,<br>46.84)  | 17.60<br>(1.31,<br>38.69) | 9.44<br>(0.30,<br>29.45) | 2,268 (907,<br>3,890)                                            | 1,992 (606,<br>3,511) | 1,694 (368,<br>3,194) | 1,065 (83,<br>2,540) | 571 (25,<br>1,897) |
| T<br>H<br>A | 4,748 (2,899,<br>6,637)        | Age-<br>specific<br>curves | 30.58<br>(16.12,<br>44.17)                                         | 23.16<br>(12.08,<br>34.20) | 14.93<br>(7.76,<br>22.43)  | 1.87<br>(1.03,<br>2.77)   | 0.01<br>(0.00,<br>0.01)  | 1,452 (715,<br>2,395)                                            | 1,100 (535,<br>1,852) | 709 (344,<br>1,215)   | 89 (45, 149)         | 0 (0, 1)           |
| T<br>H<br>A | 4,748 (2,899,<br>6,637)        | All-ages<br>curve          | 30.26<br>(13.11,<br>44.24)                                         | 23.02<br>(4.96,<br>38.32)  | 15.25<br>(1.30,<br>31.75)  | 4.87<br>(0.09,<br>18.15)  | 1.42<br>(0.01,<br>8.40)  | 1,437 (445,<br>2,538)                                            | 1,093 (187,<br>2,084) | 724 (55,<br>1,661)    | 231 (4, 814)         | 67 (0, 399)        |
| T<br>H<br>A | 4,748 (2,899,<br>6,637)        | Zhang et<br>al. 2021       | 16.37<br>(11.09,<br>20.96)                                         | 12.24<br>(6.70,<br>17.06)  | 7.90<br>(2.58,<br>12.97)   | 1.38<br>(0.10,<br>4.81)   | 0.11<br>(0.00,<br>0.92)  | 777 (407,<br>1,189)                                              | 581 (266,<br>933)     | 375 (117,<br>686)     | 66 (5, 245)          | 5 (0, 45)          |
| T<br>H<br>A | 4,748 (2,899,<br>6,637)        | Xie et<br>al. 2021         | 22.38<br>(8.43,<br>35.29)                                          | 16.74<br>(2.96,<br>30.53)  | 10.94<br>(0.85,<br>25.40)  | 3.30<br>(0.11,<br>14.59)  | 0.79<br>(0.06,<br>6.65)  | 1,062 (297,<br>1,898)                                            | 795 (109,<br>1,597)   | 520 (31,<br>1,299)    | 157 (5, 692)         | 38 (2, 306)        |
| TJ<br>K     | 2,589 (1,474,<br>3,647)        | Age-<br>specific<br>curves | 41.39<br>(23.82,<br>55.89)                                         | 35.04<br>(20.02,<br>48.19) | 28.14<br>(16.06,<br>39.35) | 13.45<br>(7.66,<br>19.19) | 2.44<br>(1.56,<br>3.37)  | 1,072 (483,<br>1,726)                                            | 907 (404,<br>1,468)   | 729 (322,<br>1,181)   | 348 (157,<br>557)    | 63 (32, 101)       |
| TJ<br>K     | 2,589 (1,474,<br>3,647)        | All-ages<br>curve          | 40.34<br>(21.91,<br>55.99)                                         | 33.93<br>(13.87,<br>51.32) | 26.98<br>(6.92,<br>46.18)  | 13.30<br>(1.19,<br>34.90) | 5.14<br>(0.23,<br>23.71) | 1,044 (379,<br>1,743)                                            | 879 (251,<br>1,572)   | 698 (129,<br>1,391)   | 344 (24,<br>989)     | 133 (5, 657)       |
| TJ<br>K     | 2,589 (1,474,<br>3,647)        | Zhang et<br>al. 2021       | 23.45<br>(16.67,<br>29.18)                                         | 19.69<br>(12.59,<br>25.68) | 15.80<br>(8.44,<br>22.02)  | 8.01<br>(1.84,<br>14.47)  | 2.40<br>(0.17,<br>7.17)  | 607 (325,<br>906)                                                | 510 (257,<br>779)     | 409 (193,<br>649)     | 207 (45,<br>393)     | 62 (4, 183)        |
| TJ<br>K     | 2,589 (1,474,<br>3,647)        | Xie et<br>al. 2021         | 31.36<br>(14.06,<br>46.63)                                         | 26.26<br>(8.02,<br>42.68)  | 20.87<br>(3.30,<br>38.45)  | 10.42<br>(0.52,<br>29.23) | 4.20<br>(0.16,<br>19.57) | 812 (262,<br>1,332)                                              | 680 (148,<br>1,197)   | 540 (63,<br>1,068)    | 270 (9, 814)         | 109 (3, 536)       |
| T<br>K<br>M | 1,249 (749,<br>1,760)          | Age-<br>specific<br>curves | 41.35<br>(23.37,<br>56.23)                                         | 35.03<br>(19.66,<br>48.48) | 28.03<br>(15.71,<br>39.49) | 12.32<br>(6.99,<br>17.68) | 1.94<br>(1.24,<br>2.69)  | 516 (244,<br>816)                                                | 438 (206,<br>701)     | 350 (165,<br>569)     | 154 (77,<br>254)     | 24 (12, 39)        |
| T<br>K<br>M | 1,249 (749,<br>1,760)          | All-ages<br>curve          | 40.50<br>(21.59,<br>56.18)                                         | 34.21<br>(13.19,<br>51.56) | 27.23<br>(6.25,<br>46.41)  | 13.37<br>(1.01,<br>34.66) | 5.16<br>(0.23,<br>22.68) | 506 (171,<br>817)                                                | 427 (92,<br>736)      | 340 (40,<br>641)      | 167 (7, 453)         | 64 (2, 287)        |
| T<br>K<br>M | 1,249 (749,<br>1,760)          | Zhang et<br>al. 2021       | 23.33<br>(16.56,<br>29.07)                                         | 19.54<br>(12.43,<br>25.56) | 15.57<br>(8.10,<br>21.87)  | 7.33<br>(1.57,<br>13.95)  | 1.87<br>(0.13,<br>6.47)  | 291 (139,<br>442)                                                | 244 (107,<br>387)     | 194 (79,<br>324)      | 92 (16, 203)         | 23 (2, 87)         |

| IS<br>O     | Total number<br>of stillbirths | Method                     | Fraction of stillbirths attributable to $PM_{2.5} > C_0 \mu g/m^3$ |                           |                           |                           |                          | Number of stillbirths attributable to $PM_{2.5} > C_0 \mu g/m^3$ |                   |                   |              |             |
|-------------|--------------------------------|----------------------------|--------------------------------------------------------------------|---------------------------|---------------------------|---------------------------|--------------------------|------------------------------------------------------------------|-------------------|-------------------|--------------|-------------|
|             |                                |                            | $C_0 = 5$                                                          | $C_0 = 10$                | $C_0 = 15$                | $C_0 = 25$                | $C_0 = 35$               | $C_0 = 5$                                                        | $C_0 = 10$        | $C_0 = 15$        | $C_0 = 25$   | $C_0 = 35$  |
| T<br>K<br>M | 1,249 (749,<br>1,760)          | Xie et<br>al. 2021         | 31.29<br>(13.91,<br>46.58)                                         | 26.18<br>(7.66,<br>42.61) | 20.67<br>(3.12,<br>38.33) | 10.16<br>(0.49,<br>28.70) | 4.01<br>(0.13,<br>18.68) | 391 (129,<br>672)                                                | 327 (77,<br>604)  | 258 (29,<br>532)  | 127 (5, 384) | 50 (2, 242) |
| T<br>L<br>S | 492 (294, 700)                 | Age-<br>specific<br>curves | 14.69<br>(7.54,<br>22.50)                                          | 5.35<br>(2.71,<br>8.41)   | 0.00<br>(0.00,<br>0.05)   | 0.00<br>(0.00,<br>0.09)   | 0.00<br>(0.00,<br>0.00)  | 72 (34, 132)                                                     | 26 (13, 49)       | 0 (0, 0)          | 0 (0, 0)     | 0 (0, 0)    |
| T<br>L<br>S | 492 (294, 700)                 | All-ages<br>curve          | 14.30<br>(2.91,<br>24.75)                                          | 6.00<br>(0.10,<br>17.05)  | 1.24<br>(0.00,<br>8.66)   | 0.00<br>(0.00,<br>1.64)   | 0.00<br>(0.00,<br>0.74)  | 70 (14, 134)                                                     | 29 (0, 80)        | 6 (0, 42)         | 0 (0, 8)     | 0 (0, 3)    |
| T<br>L<br>S | 492 (294, 700)                 | Zhang et<br>al. 2021       | 7.30<br>(4.09,<br>10.12)                                           | 2.73<br>(0.33,<br>5.73)   | 0.21<br>(0.00,<br>1.67)   | 0.00<br>(0.00,<br>0.02)   | 0.00<br>(0.00,<br>0.00)  | 36 (17, 56)                                                      | 13 (1, 29)        | 1 (0, 8)          | 0 (0, 0)     | 0 (0, 0)    |
| T<br>L<br>S | 492 (294, 700)                 | Xie et<br>al. 2021         | 9.87<br>(1.83,<br>18.50)                                           | 3.68<br>(0.13,<br>12.37)  | 0.73<br>(0.00,<br>6.73)   | 0.01<br>(0.00,<br>1.35)   | 0.00<br>(0.00,<br>0.49)  | 49 (10, 101)                                                     | 18 (1, 66)        | 4 (0, 35)         | 0 (0, 7)     | 0 (0, 3)    |
| T<br>T<br>O | 187 (157, 220)                 | Age-<br>specific<br>curves | 22.31<br>(11.13,<br>33.56)                                         | 14.04<br>(6.88,<br>21.71) | 5.01<br>(2.42,<br>7.93)   | 0.00<br>(0.00,<br>0.01)   | 0.00<br>(0.00,<br>0.00)  | 42 (20, 67)                                                      | 26 (13, 43)       | 9 (4, 16)         | 0 (0, 0)     | 0 (0, 0)    |
| T<br>T<br>O | 187 (157, 220)                 | All-ages<br>curve          | 21.99<br>(7.61,<br>34.72)                                          | 13.63<br>(0.84,<br>28.01) | 6.58<br>(0.04,<br>20.19)  | 1.27<br>(0.00,<br>7.81)   | 0.44<br>(0.00,<br>2.54)  | 41 (14, 68)                                                      | 25 (1, 54)        | 12 (0, 38)        | 2 (0, 13)    | 1 (0, 5)    |
| T<br>T<br>O | 187 (157, 220)                 | Zhang et<br>al. 2021       | 11.61<br>(7.44,<br>15.31)                                          | 7.25<br>(2.87,<br>11.19)  | 2.79<br>(0.19,<br>6.76)   | 0.12<br>(0.00,<br>0.59)   | 0.00<br>(0.00,<br>0.00)  | 22 (12, 29)                                                      | 14 (5, 21)        | 5 (0, 13)         | 0 (0, 1)     | 0 (0, 0)    |
| T<br>T<br>O | 187 (157, 220)                 | Xie et<br>al. 2021         | 16.29<br>(4.80,<br>26.68)                                          | 10.52<br>(0.59,<br>21.24) | 5.00<br>(0.09,<br>15.41)  | 1.19<br>(0.00,<br>5.24)   | 0.12<br>(0.00,<br>1.59)  | 30 (8, 54)                                                       | 20 (1, 43)        | 9 (0, 32)         | 2 (0, 11)    | 0 (0, 3)    |
| T<br>U<br>N | 2,520 (2,369,<br>2,664)        | Age-<br>specific<br>curves | 25.72<br>(13.08,<br>38.93)                                         | 17.74<br>(8.94,<br>27.57) | 8.89<br>(4.49,<br>14.13)  | 0.13<br>(0.08,<br>0.21)   | 0.00<br>(0.00,<br>0.01)  | 648 (325,<br>948)                                                | 447 (222,<br>671) | 224 (111,<br>343) | 3 (2, 5)     | 0 (0, 0)    |
| T<br>U<br>N | 2,520 (2,369,<br>2,664)        | All-ages<br>curve          | 24.86<br>(10.05,<br>38.41)                                         | 16.53<br>(2.67,<br>32.01) | 8.34<br>(0.44,<br>25.01)  | 1.70<br>(0.01,<br>11.11)  | 0.45<br>(0.00,<br>4.02)  | 627 (242,<br>998)                                                | 417 (63,<br>828)  | 210 (10,<br>643)  | 43 (0, 286)  | 11 (0, 101) |
| T<br>U<br>N | 2,520 (2,369,<br>2,664)        | Zhang et<br>al. 2021       | 13.40<br>(8.82,<br>17.41)                                          | 9.14<br>(4.36,<br>13.32)  | 4.74<br>(0.85,<br>9.05)   | 0.24<br>(0.01,<br>1.67)   | 0.01<br>(0.00,<br>0.12)  | 338 (219,<br>450)                                                | 230 (108,<br>346) | 119 (21,<br>232)  | 6 (0, 43)    | 0 (0, 3)    |



| IS<br>O     | Total number<br>of stillbirths | Method                     | Fraction of stillbirths attributable to $PM_{2.5} > C_0 \mu g/m^3$ |                            |                            |                           |                          | Number of stillbirths attributable to $PM_{2.5} > C_0 \mu g/m^3$ |                              |                          |                            |                      |
|-------------|--------------------------------|----------------------------|--------------------------------------------------------------------|----------------------------|----------------------------|---------------------------|--------------------------|------------------------------------------------------------------|------------------------------|--------------------------|----------------------------|----------------------|
|             |                                |                            | $C_0 = 5$                                                          | $C_0 = 10$                 | $C_0 = 15$                 | $C_0 = 25$                | $C_0 = 35$               | $C_0 = 5$                                                        | $C_0 = 10$                   | $C_0 = 15$               | $C_0 = 25$                 | $C_0 = 35$           |
| T<br>U<br>N | 2,520 (2,369,<br>2,664)        | Xie et<br>al. 2021         | 18.51<br>(6.33,<br>30.22)                                          | 12.68<br>(1.39,<br>25.21)  | 6.96<br>(0.23,<br>19.83)   | 0.98<br>(0.02,<br>8.79)   | 0.42<br>(0.00,<br>2.87)  | 466 (159,<br>761)                                                | 320 (35,<br>635)             | 175 (6, 497)             | 25 (0, 221)                | 11 (0, 75)           |
| T<br>U<br>R | 6,333 (6,167,<br>6,524)        | Age-<br>specific<br>curves | 39.99<br>(22.09,<br>55.05)                                         | 33.59<br>(18.38,<br>47.02) | 26.49<br>(14.51,<br>37.56) | 11.01<br>(6.23,<br>15.65) | 1.94<br>(1.26,<br>2.70)  | 2,533 (1,396,<br>3,482)                                          | 2,127 (1,162,<br>2,979)      | 1,677 (921,<br>2,386)    | 697 (396,<br>989)          | 123 (81,<br>171)     |
| T<br>U<br>R | 6,333 (6,167,<br>6,524)        | All-ages<br>curve          | 39.23<br>(20.62,<br>54.67)                                         | 32.79<br>(12.29,<br>49.83) | 25.65<br>(5.68,<br>44.43)  | 12.25<br>(0.88,<br>32.19) | 4.65<br>(0.16,<br>20.64) | 2,485 (1,303,<br>3,455)                                          | 2,077 (776,<br>3,135)        | 1,624 (359,<br>2,787)    | 776 (55,<br>2,012)         | 295 (10,<br>1,290)   |
| T<br>U<br>R | 6,333 (6,167,<br>6,524)        | Zhang et<br>al. 2021       | 22.47<br>(15.89,<br>28.10)                                         | 18.63<br>(11.72,<br>24.55) | 14.60<br>(7.41,<br>20.82)  | 6.51<br>(1.44,<br>12.86)  | 1.68<br>(0.10,<br>5.82)  | 1,423 (1,005,<br>1,791)                                          | 1,180 (740,<br>1,562)        | 925 (466,<br>1,325)      | 412 (90,<br>816)           | 107 (6, 370)         |
| T<br>U<br>R | 6,333 (6,167,<br>6,524)        | Xie et<br>al. 2021         | 30.24<br>(13.31,<br>45.25)                                         | 25.12<br>(7.17,<br>41.24)  | 19.62<br>(2.92,<br>36.90)  | 9.51<br>(0.47,<br>27.24)  | 3.81<br>(0.15,<br>17.45) | 1,915 (836,<br>2,871)                                            | 1,591 (451,<br>2,619)        | 1,242 (185,<br>2,346)    | 602 (30,<br>1,736)         | 241 (9,<br>1,113)    |
| T<br>Z<br>A | 40,166<br>(33,359,<br>47,151)  | Age-<br>specific<br>curves | 29.07<br>(15.84,<br>41.69)                                         | 21.37<br>(11.56,<br>31.29) | 12.91<br>(6.95,<br>19.20)  | 1.68<br>(0.98,<br>2.44)   | 0.02<br>(0.01,<br>0.02)  | 11,676<br>(6,397,<br>16,983)                                     | 8,582 (4,652,<br>12,730)     | 5,186 (2,788,<br>7,782)  | 674 (391,<br>986)          | 6 (4, 9)             |
| T<br>Z<br>A | 40,166<br>(33,359,<br>47,151)  | All-ages<br>curve          | 28.40<br>(12.00,<br>42.02)                                         | 20.92<br>(4.35,<br>35.88)  | 13.45<br>(1.26,<br>29.17)  | 3.72<br>(0.13,<br>15.79)  | 1.14<br>(0.01,<br>7.18)  | 11,406<br>(4,724,<br>17,384)                                     | 8,405 (1,761,<br>14,868)     | 5,402 (503,<br>11,958)   | 1,495 (50,<br>6,067)       | 458 (4,<br>2,679)    |
| T<br>Z<br>A | 40,166<br>(33,359,<br>47,151)  | Zhang et<br>al. 2021       | 15.34<br>(10.29,<br>19.72)                                         | 11.16<br>(5.88,<br>15.74)  | 6.85<br>(2.20,<br>11.57)   | 1.24<br>(0.11,<br>4.14)   | 0.11<br>(0.00,<br>0.90)  | 6,160 (3,963,<br>8,164)                                          | 4,482 (2,312,<br>6,404)      | 2,751 (909,<br>4,716)    | 500 (46,<br>1,621)         | 43 (0, 350)          |
| T<br>Z<br>A | 40,166<br>(33,359,<br>47,151)  | Xie et<br>al. 2021         | 20.94<br>(7.73,<br>33.43)                                          | 15.17<br>(2.51,<br>28.54)  | 9.45<br>(0.64,<br>23.28)   | 2.85<br>(0.10,<br>12.72)  | 0.97<br>(0.04,<br>5.85)  | 8,412 (2,991,<br>13,900)                                         | 6,093 (949,<br>11,661)       | 3,798 (239,<br>9,388)    | 1,144 (37,<br>4,983)       | 389 (15,<br>2,273)   |
| U<br>G<br>A | 30,318<br>(26,704,<br>33,932)  | Age-<br>specific<br>curves | 40.30<br>(23.22,<br>54.80)                                         | 33.82<br>(19.40,<br>46.71) | 26.63<br>(15.33,<br>37.21) | 11.74<br>(6.81,<br>16.57) | 1.84<br>(1.20,<br>2.59)  | 12,218<br>(7,214,<br>16,721)                                     | 10,253<br>(5,974,<br>14,161) | 8,073 (4,683,<br>11,244) | 3,558<br>(2,179,<br>4,968) | 558 (350,<br>794)    |
| U<br>G<br>A | 30,318<br>(26,704,<br>33,932)  | All-ages<br>curve          | 39.17<br>(20.74,<br>54.61)                                         | 32.65<br>(12.57,<br>49.73) | 25.44<br>(6.07,<br>44.29)  | 12.23<br>(0.63,<br>32.15) | 4.43<br>(0.08,<br>20.66) | 11,877<br>(5,991,<br>17,358)                                     | 9,898 (3,721,<br>15,785)     | 7,713 (1,804,<br>13,817) | 3,709 (185,<br>9,931)      | 1,344 (26,<br>6,386) |
| U<br>G<br>A | 30,318<br>(26,704,<br>33,932)  | Zhang et<br>al. 2021       | 22.53<br>(15.95,<br>28.16)                                         | 18.70<br>(11.79,<br>24.63) | 14.67<br>(7.53,<br>20.91)  | 6.85<br>(1.49,<br>13.09)  | 1.72<br>(0.06,<br>6.38)  | 6,831 (4,419,<br>8,853)                                          | 5,669 (3,284,<br>7,751)      | 4,449 (2,132,<br>6,582)  | 2,075 (454,<br>4,046)      | 520 (17,<br>1,963)   |

| IS<br>O     | Total number<br>of stillbirths | Method                     | Fraction of stillbirths attributable to $PM_{2.5} > C_0 \mu g/m^3$ |                            |                            |                           |                          | Number of stillbirths attributable to $PM_{2.5} > C_0 \mu g/m^3$ |                          |                        |                       |                      |
|-------------|--------------------------------|----------------------------|--------------------------------------------------------------------|----------------------------|----------------------------|---------------------------|--------------------------|------------------------------------------------------------------|--------------------------|------------------------|-----------------------|----------------------|
|             |                                |                            | $C_0 = 5$                                                          | $C_0 = 10$                 | $C_0 = 15$                 | $C_0 = 25$                | $C_0 = 35$               | $C_0 = 5$                                                        | $C_0 = 10$               | $C_0 = 15$             | $C_0 = 25$            | $C_0 = 35$           |
| U<br>G<br>A | 30,318<br>(26,704,<br>33,932)  | Xie et<br>al. 2021         | 30.31<br>(13.37,<br>45.28)                                         | 25.21<br>(7.37,<br>41.26)  | 19.76<br>(3.03,<br>36.93)  | 9.88<br>(0.44,<br>27.40)  | 4.09<br>(0.11,<br>17.87) | 9,190 (3,964,<br>13,716)                                         | 7,643 (2,218,<br>12,304) | 5,992 (914,<br>11,037) | 2,996 (132,<br>8,273) | 1,240 (34,<br>5,465) |
| U<br>R<br>Y | 234 (220, 247)                 | Age-<br>specific<br>curves | 13.24<br>(6.78,<br>20.34)                                          | 3.95<br>(1.99,<br>6.24)    | 0.00<br>(0.00,<br>0.08)    | 0.00<br>(0.00,<br>0.10)   | 0.00<br>(0.00,<br>0.00)  | 31 (16, 48)                                                      | 9 (5, 15)                | 0 (0, 0)               | 0 (0, 0)              | 0 (0, 0)             |
| U<br>R<br>Y | 234 (220, 247)                 | All-ages<br>curve          | 12.50<br>(2.64,<br>22.65)                                          | 4.02<br>(0.11,<br>14.56)   | 1.26<br>(0.00,<br>7.29)    | 0.01<br>(0.00,<br>1.64)   | 0.00<br>(0.00,<br>0.60)  | 29 (6, 54)                                                       | 9 (0, 35)                | 3 (0, 17)              | 0 (0, 4)              | 0 (0, 1)             |
| U<br>R<br>Y | 234 (220, 247)                 | Zhang et<br>al. 2021       | 6.66<br>(3.62,<br>9.34)                                            | 2.16<br>(0.19,<br>4.88)    | 0.07<br>(0.00,<br>1.20)    | 0.00<br>(0.00,<br>0.00)   | 0.00<br>(0.00,<br>0.00)  | 16 (8, 22)                                                       | 5 (0, 11)                | 0 (0, 3)               | 0 (0, 0)              | 0 (0, 0)             |
| U<br>R<br>Y | 234 (220, 247)                 | Xie et<br>al. 2021         | 9.13<br>(1.48,<br>17.44)                                           | 3.05<br>(0.11,<br>11.52)   | 0.59<br>(0.00,<br>5.93)    | 0.02<br>(0.00,<br>0.93)   | 0.00<br>(0.00,<br>0.45)  | 21 (4, 41)                                                       | 7 (0, 27)                | 1 (0, 14)              | 0 (0, 2)              | 0 (0, 1)             |
| U<br>Z<br>B | 5,263 (3,136,<br>7,316)        | Age-<br>specific<br>curves | 43.50<br>(24.99,<br>58.48)                                         | 37.39<br>(21.32,<br>51.23) | 30.62<br>(17.44,<br>42.69) | 15.38<br>(8.79,<br>21.88) | 3.21<br>(2.03,<br>4.42)  | 2,289 (1,047,<br>3,604)                                          | 1,968 (898,<br>3,121)    | 1,611 (739,<br>2,586)  | 810 (393,<br>1,327)   | 169 (86,<br>264)     |
| U<br>Z<br>B | 5,263 (3,136,<br>7,316)        | All-ages<br>curve          | 42.58<br>(23.78,<br>58.53)                                         | 36.37<br>(15.65,<br>54.07) | 29.45<br>(8.09,<br>49.16)  | 15.14<br>(1.45,<br>37.89) | 6.42<br>(0.30,<br>26.08) | 2,241 (993,<br>3,573)                                            | 1,914 (692,<br>3,210)    | 1,550 (358,<br>2,851)  | 797 (65,<br>2,141)    | 338 (13,<br>1,444)   |
| U<br>Z<br>B | 5,263 (3,136,<br>7,316)        | Zhang et<br>al. 2021       | 24.98<br>(17.89,<br>30.98)                                         | 21.28<br>(13.85,<br>27.56) | 17.38<br>(9.62,<br>23.97)  | 9.20<br>(2.50,<br>16.26)  | 2.95<br>(0.26,<br>8.52)  | 1,315 (687,<br>1,966)                                            | 1,120 (596,<br>1,722)    | 915 (435,<br>1,455)    | 484 (100,<br>938)     | 155 (10,<br>472)     |
| U<br>Z<br>B | 5,263 (3,136,<br>7,316)        | Xie et<br>al. 2021         | 33.49<br>(15.30,<br>49.13)                                         | 28.66<br>(9.20,<br>45.41)  | 23.48<br>(4.25,<br>41.39)  | 12.87<br>(0.64,<br>32.39) | 5.41<br>(0.17,<br>22.67) | 1,762 (691,<br>2,973)                                            | 1,509 (425,<br>2,663)    | 1,236 (187,<br>2,355)  | 677 (32,<br>1,753)    | 285 (8,<br>1,202)    |
| V<br>C<br>T | 22 (19, 25)                    | Age-<br>specific<br>curves | 20.57<br>(10.51,<br>30.88)                                         | 12.01<br>(6.02,<br>18.53)  | 2.58<br>(1.28,<br>4.09)    | 0.00<br>(0.00,<br>0.01)   | 0.00<br>(0.00,<br>0.00)  | 5 (2, 7)                                                         | 3 (1, 4)                 | 1 (0, 1)               | 0 (0, 0)              | 0 (0, 0)             |
| V<br>C<br>T | 22 (19, 25)                    | All-ages<br>curve          | 19.80<br>(6.47,<br>32.29)                                          | 10.89<br>(0.86,<br>25.46)  | 3.08<br>(0.02,<br>17.37)   | 0.29<br>(0.00,<br>5.65)   | 0.00<br>(0.00,<br>1.77)  | 4 (1, 7)                                                         | 2 (0, 6)                 | 1 (0, 4)               | 0 (0, 1)              | 0 (0, 0)             |
| V<br>C<br>T | 22 (19, 25)                    | Zhang et<br>al. 2021       | 10.77<br>(6.55,<br>14.00)                                          | 6.63<br>(1.88,<br>9.81)    | 2.51<br>(0.05,<br>5.39)    | 0.02<br>(0.00,<br>0.23)   | 0.00<br>(0.00,<br>0.00)  | 2 (1, 3)                                                         | 1 (0, 2)                 | 1 (0, 1)               | 0 (0, 0)              | 0 (0, 0)             |

| IS<br>O     | Total number<br>of stillbirths | Method              | Fraction of stillbirths attributable to $PM_{2.5} > C_0 \mu g/m^3$ |                            |                            |                            |                            | Number of stillbirths attributable to $PM_{2.5} > C_0 \mu g/m^3$ |                          |                          |                            |                            |
|-------------|--------------------------------|---------------------|--------------------------------------------------------------------|----------------------------|----------------------------|----------------------------|----------------------------|------------------------------------------------------------------|--------------------------|--------------------------|----------------------------|----------------------------|
|             |                                |                     | $C_0 = 5$                                                          | $C_0 = 10$                 | $C_0 = 15$                 | $C_0 = 25$                 | $C_0 = 35$                 | $C_0 = 5$                                                        | $C_0 = 10$               | $C_0 = 15$               | $C_0 = 25$                 | $C_0 = 35$                 |
| V<br>C<br>T | 22 (19, 25)                    | Xie et al. 2021     | 14.32<br>(4.21,<br>24.77)                                          | 7.90<br>(0.50,<br>19.31)   | 3.19<br>(0.03,<br>13.37)   | 0.46<br>(0.00,<br>4.15)    | 0.00<br>(0.00,<br>1.51)    | 3 (1, 5)                                                         | 2 (0, 4)                 | 1 (0, 3)                 | 0 (0, 1)                   | 0 (0, 0)                   |
| V<br>E<br>N | 5,258 (2,999,<br>7,410)        | Age-specific curves | 28.33<br>(15.00,<br>40.75)                                         | 20.68<br>(10.78,<br>30.43) | 12.36<br>(6.39,<br>18.58)  | 0.41<br>(0.24,<br>0.63)    | 0.00<br>(0.00,<br>0.00)    | 1,490 (672,<br>2,413)                                            | 1,087 (483,<br>1,791)    | 650 (287,<br>1,087)      | 22 (10, 36)                | 0 (0, 0)                   |
| V<br>E<br>N | 5,258 (2,999,<br>7,410)        | All-ages curve      | 27.98<br>(11.59,<br>41.91)                                         | 20.35<br>(3.59,<br>35.92)  | 12.46<br>(0.64,<br>29.30)  | 2.82<br>(0.04,<br>15.23)   | 0.54<br>(0.00,<br>6.29)    | 1,471 (479,<br>2,681)                                            | 1,070 (139,<br>2,228)    | 655 (29,<br>1,794)       | 149 (2, 861)               | 28 (0, 344)                |
| V<br>E<br>N | 5,258 (2,999,<br>7,410)        | Zhang et al. 2021   | 15.02<br>(10.07,<br>19.39)                                         | 10.78<br>(5.66,<br>15.42)  | 6.41<br>(1.76,<br>11.28)   | 0.63<br>(0.02,<br>3.37)    | 0.02<br>(0.00,<br>0.33)    | 790 (398,<br>1,213)                                              | 567 (229,<br>923)        | 337 (67,<br>664)         | 33 (1, 192)                | 1 (0, 17)                  |
| V<br>E<br>N | 5,258 (2,999,<br>7,410)        | Xie et al. 2021     | 20.71<br>(7.61,<br>33.08)                                          | 15.06<br>(2.32,<br>28.21)  | 9.28<br>(0.48,<br>22.89)   | 2.13<br>(0.05,<br>12.19)   | 0.33<br>(0.02,<br>4.86)    | 1,089 (333,<br>1,865)                                            | 792 (98,<br>1,582)       | 488 (22,<br>1,256)       | 112 (2, 620)               | 17 (1, 256)                |
| V<br>N<br>M | 13,633 (9,353,<br>18,165)      | Age-specific curves | 35.68<br>(19.98,<br>49.27)                                         | 28.78<br>(16.09,<br>40.30) | 21.13<br>(11.91,<br>29.89) | 8.69<br>(5.01,<br>12.32)   | 1.93<br>(1.24,<br>2.71)    | 4,865 (2,360,<br>7,482)                                          | 3,924 (1,893,<br>6,138)  | 2,881 (1,389,<br>4,558)  | 1,184 (614,<br>1,866)      | 264 (142,<br>398)          |
| V<br>N<br>M | 13,633 (9,353,<br>18,165)      | All-ages curve      | 35.17<br>(17.70,<br>49.74)                                         | 28.41<br>(9.98,<br>44.46)  | 21.16<br>(4.85,<br>38.59)  | 9.91<br>(0.83,<br>26.30)   | 4.10<br>(0.21,<br>16.79)   | 4,794 (1,978,<br>7,945)                                          | 3,873 (1,099,<br>6,985)  | 2,885 (520,<br>5,944)    | 1,351 (88,<br>3,835)       | 558 (25,<br>2,305)         |
| V<br>N<br>M | 13,633 (9,353,<br>18,165)      | Zhang et al. 2021   | 19.90<br>(13.91,<br>25.05)                                         | 15.93<br>(9.66,<br>21.34)  | 11.77<br>(5.81,<br>17.45)  | 5.23<br>(1.32,<br>9.82)    | 1.73<br>(0.08,<br>4.80)    | 2,713 (1,677,<br>3,866)                                          | 2,172 (1,221,<br>3,195)  | 1,605 (749,<br>2,529)    | 713 (176,<br>1,428)        | 235 (9, 677)               |
| V<br>N<br>M | 13,633 (9,353,<br>18,165)      | Xie et al. 2021     | 26.92<br>(11.30,<br>40.87)                                         | 21.63<br>(5.70,<br>36.58)  | 16.23<br>(2.40,<br>31.96)  | 7.87<br>(0.36,<br>22.19)   | 3.11<br>(0.11,<br>14.14)   | 3,669 (1,447,<br>6,116)                                          | 2,948 (702,<br>5,387)    | 2,213 (291,<br>4,629)    | 1,072 (42,<br>3,019)       | 424 (13,<br>1,916)         |
| Y<br>E<br>M | 20,512<br>(15,380,<br>25,427)  | Age-specific curves | 53.63<br>(34.21,<br>68.09)                                         | 48.58<br>(30.72,<br>62.53) | 42.98<br>(27.68,<br>55.99) | 30.15<br>(20.11,<br>39.81) | 15.64<br>(10.62,<br>20.45) | 11,000<br>(6,487,<br>15,265)                                     | 9,965 (5,842,<br>13,967) | 8,816 (5,156,<br>12,438) | 6,185<br>(3,710,<br>8,813) | 3,208<br>(2,032,<br>4,647) |
| Y<br>E<br>M | 20,512<br>(15,380,<br>25,427)  | All-ages curve      | 51.91<br>(31.23,<br>67.19)                                         | 46.78<br>(24.08,<br>63.62) | 41.07<br>(16.17,<br>59.64) | 28.04<br>(4.46,<br>50.52)  | 16.01<br>(1.10,<br>40.38)  | 10,648<br>(5,834,<br>14,903)                                     | 9,595 (4,498,<br>13,907) | 8,423 (3,001,<br>12,910) | 5,751 (816,<br>10,766)     | 3,283 (218,<br>8,786)      |
| Y<br>E<br>M | 20,512<br>(15,380,<br>25,427)  | Zhang et al. 2021   | 32.87<br>(24.30,<br>39.95)                                         | 29.56<br>(20.57,<br>37.01) | 26.07<br>(16.65,<br>33.92) | 18.58<br>(8.31,<br>27.27)  | 10.50<br>(2.19,<br>19.96)  | 6,743 (4,198,<br>9,394)                                          | 6,063 (3,650,<br>8,697)  | 5,348 (2,996,<br>7,965)  | 3,810<br>(1,533,<br>6,304) | 2,154 (414,<br>4,397)      |

| IS<br>O     | Total number<br>of stillbirths | Method                     | Fraction of stillbirths attributable to $PM_{2.5} > C_0 \mu g/m^3$ |                            |                            |                           |                           | Number of stillbirths attributable to $PM_{2.5} > C_0 \mu g/m^3$ |                          |                          |                            |                       |
|-------------|--------------------------------|----------------------------|--------------------------------------------------------------------|----------------------------|----------------------------|---------------------------|---------------------------|------------------------------------------------------------------|--------------------------|--------------------------|----------------------------|-----------------------|
|             |                                |                            | $C_0 = 5$                                                          | $C_0 = 10$                 | $C_0 = 15$                 | $C_0 = 25$                | $C_0 = 35$                | $C_0 = 5$                                                        | $C_0 = 10$               | $C_0 = 15$               | $C_0 = 25$                 | $C_0 = 35$            |
| Y<br>E<br>M | 20,512<br>(15,380,<br>25,427)  | Xie et<br>al. 2021         | 43.23<br>(21.64,<br>60.31)                                         | 39.14<br>(15.86,<br>57.43) | 34.72<br>(9.82,<br>54.32)  | 24.86<br>(2.41,<br>47.34) | 14.75<br>(0.67,<br>39.22) | 8,868 (4,028,<br>13,695)                                         | 8,028 (2,984,<br>12,834) | 7,122 (1,934,<br>11,945) | 5,100 (502,<br>10,186)     | 3,026 (122,<br>8,418) |
| Z<br>A<br>F | 20,415<br>(17,209,<br>24,025)  | Age-<br>specific<br>curves | 30.73<br>(18.27,<br>41.73)                                         | 23.96<br>(14.32,<br>32.54) | 17.58<br>(10.68,<br>23.76) | 9.10<br>(6.25,<br>11.93)  | 4.75<br>(3.04,<br>6.11)   | 6,273 (3,274,<br>8,615)                                          | 4,891 (2,644,<br>6,690)  | 3,590 (2,095,<br>4,872)  | 1,857<br>(1,204,<br>2,481) | 970 (650,<br>1,318)   |
| Z<br>A<br>F | 20,415<br>(17,209,<br>24,025)  | All-ages<br>curve          | 29.92<br>(15.60,<br>42.97)                                         | 23.19<br>(9.31,<br>37.09)  | 17.21<br>(5.31,<br>31.34)  | 9.37<br>(1.48,<br>21.34)  | 5.02<br>(0.48,<br>14.86)  | 6,108 (2,967,<br>9,279)                                          | 4,735 (1,890,<br>7,873)  | 3,514 (1,120,<br>6,661)  | 1,914 (304,<br>4,433)      | 1,024 (92,<br>2,917)  |
| Z<br>A<br>F | 20,415<br>(17,209,<br>24,025)  | Zhang et<br>al. 2021       | 17.67<br>(12.33,<br>22.27)                                         | 13.91<br>(8.65,<br>18.59)  | 10.55<br>(5.84,<br>15.17)  | 6.02<br>(2.70,<br>9.61)   | 3.44<br>(1.03,<br>6.23)   | 3,607 (2,358,<br>4,888)                                          | 2,840 (1,691,<br>4,027)  | 2,153 (1,177,<br>3,274)  | 1,228 (559,<br>2,073)      | 701 (219,<br>1,343)   |
| Z<br>A<br>F | 20,415<br>(17,209,<br>24,025)  | Xie et<br>al. 2021         | 23.68<br>(10.10,<br>35.92)                                         | 18.74<br>(5.88,<br>31.39)  | 14.38<br>(3.41,<br>27.02)  | 8.27<br>(1.12,<br>19.28)  | 4.94<br>(0.37,<br>13.81)  | 4,835 (1,857,<br>7,589)                                          | 3,826 (1,045,<br>6,628)  | 2,936 (601,<br>5,721)    | 1,688 (196,<br>4,054)      | 1,008 (67,<br>2,845)  |
| Z<br>M<br>B | 9,615 (8,097,<br>11,134)       | Age-<br>specific<br>curves | 31.13<br>(16.73,<br>44.56)                                         | 23.72<br>(12.57,<br>34.73) | 15.50<br>(8.18,<br>23.16)  | 1.29<br>(0.72,<br>1.95)   | 0.00<br>(0.00,<br>0.00)   | 2,993 (1,594,<br>4,283)                                          | 2,281 (1,199,<br>3,340)  | 1,491 (783,<br>2,228)    | 124 (70,<br>188)           | 0 (0, 0)              |
| Z<br>M<br>B | 9,615 (8,097,<br>11,134)       | All-ages<br>curve          | 30.53<br>(13.42,<br>44.84)                                         | 23.18<br>(5.09,<br>39.08)  | 15.24<br>(1.11,<br>32.68)  | 4.80<br>(0.08,<br>18.94)  | 1.42<br>(0.00,<br>8.70)   | 2,936 (1,140,<br>4,503)                                          | 2,228 (420,<br>3,918)    | 1,465 (104,<br>3,268)    | 462 (8,<br>1,888)          | 137 (0, 872)          |
| Z<br>M<br>B | 9,615 (8,097,<br>11,134)       | Zhang et<br>al. 2021       | 16.58<br>(11.28,<br>21.26)                                         | 12.44<br>(6.91,<br>17.40)  | 8.10<br>(2.78,<br>13.34)   | 1.31<br>(0.04,<br>5.18)   | 0.04<br>(0.00,<br>0.74)   | 1,594 (997,<br>2,071)                                            | 1,196 (615,<br>1,676)    | 779 (250,<br>1,271)      | 126 (4, 477)               | 3 (0, 70)             |
| Z<br>M<br>B | 9,615 (8,097,<br>11,134)       | Xie et<br>al. 2021         | 22.76<br>(8.73,<br>35.74)                                          | 17.22<br>(3.05,<br>31.03)  | 11.52<br>(0.82,<br>25.90)  | 3.42<br>(0.06,<br>15.25)  | 0.99<br>(0.02,<br>7.16)   | 2,188 (810,<br>3,563)                                            | 1,656 (280,<br>3,094)    | 1,107 (69,<br>2,588)     | 329 (5,<br>1,484)          | 95 (2, 678)           |
| Z<br>W<br>E | 8,392 (7,954,<br>8,797)        | Age-<br>specific<br>curves | 24.30<br>(12.34,<br>35.86)                                         | 16.22<br>(8.12,<br>24.54)  | 7.43<br>(3.71,<br>11.46)   | 0.00<br>(0.00,<br>0.01)   | 0.00<br>(0.00,<br>0.00)   | 2,039 (1,047,<br>2,986)                                          | 1,361 (688,<br>2,048)    | 623 (314,<br>959)        | 0 (0, 0)                   | 0 (0, 0)              |
| Z<br>W<br>E | 8,392 (7,954,<br>8,797)        | All-ages<br>curve          | 23.83<br>(9.29,<br>36.87)                                          | 15.57<br>(2.30,<br>30.34)  | 7.55<br>(0.35,<br>23.16)   | 0.96<br>(0.01,<br>10.01)  | 0.10<br>(0.00,<br>3.22)   | 2,000 (773,<br>3,152)                                            | 1,306 (192,<br>2,589)    | 634 (29,<br>1,965)       | 81 (1, 839)                | 9 (0, 272)            |
| Z<br>W<br>E | 8,392 (7,954,<br>8,797)        | Zhang et<br>al. 2021       | 12.79<br>(8.25,<br>16.65)                                          | 8.56<br>(3.75,<br>12.53)   | 4.28<br>(0.61,<br>8.22)    | 0.19<br>(0.00,<br>1.28)   | 0.01<br>(0.00,<br>0.05)   | 1,074 (695,<br>1,414)                                            | 718 (315,<br>1,068)      | 359 (51,<br>700)         | 16 (0, 106)                | 1 (0, 4)              |

| IS<br>O     | Total number<br>of stillbirths | Method             | Fraction of stillbirths attributable to $PM_{2.5} > C_0 \mu g/m^3$ |                           |                          |                         |                         | Number of stillbirths attributable to $PM_{2.5} > C_0 \mu g/m^3$ |                    |                    |             |             |
|-------------|--------------------------------|--------------------|--------------------------------------------------------------------|---------------------------|--------------------------|-------------------------|-------------------------|------------------------------------------------------------------|--------------------|--------------------|-------------|-------------|
|             |                                |                    | $C_0 = 5$                                                          | $C_0 = 10$                | $C_0 = 15$               | $C_0 = 25$              | $C_0 = 35$              | $C_0 = 5$                                                        | $C_0 = 10$         | $C_0 = 15$         | $C_0 = 25$  | $C_0 = 35$  |
| Z<br>W<br>E | 8,392 (7,954,<br>8,797)        | Xie et<br>al. 2021 | 17.55<br>(5.82,<br>28.90)                                          | 11.60<br>(1.08,<br>23.68) | 6.08<br>(0.18,<br>18.06) | 1.17<br>(0.02,<br>7.68) | 0.17<br>(0.00,<br>2.60) | 1,473 (488,<br>2,432)                                            | 973 (90,<br>1,998) | 510 (16,<br>1,529) | 98 (2, 650) | 14 (0, 219) |
