# Supplementary material for: Estimation of stillbirths attributable to ambient fine particles in 137 countries
Source: PubMed Central journal article supplement (PMC9709081; doi:10.1038/s41467-022-34250-4), 2022-11-29
Supplement: 41467_2022_34250_MOESM4_ESM.pdf [file 41467_2022_34250_MOESM4_ESM.pdf]

## **Description of Additional Supplementary Files**

File Name: Supplementary Data 1

Description: A series of look-up tables represent the exposure-response functions estimated in the current study or obtained from previous meta-analyses.

File Name: Supplementary Data 2

Description: The R codes and relevant data for the epidemiological analyses and figures.
